1 **Large-scale analysis of interindividual variability in single and paired-**  
2 **pulse TMS data: results from the ‘Big TMS Data Collaboration’**

3

4 Daniel T. Corp\*<sup>1,2</sup>, Hannah G. K. Bereznicki<sup>1</sup>, Gillian M. Clark<sup>1</sup>, George J.  
5 Youssef<sup>1,3</sup>, Peter J. Fried<sup>2</sup>, Ali Jannati<sup>2,4</sup>, Charlotte B. Davies<sup>1</sup>, Joyce Gomes-  
6 Osman<sup>2,5</sup>, Melissa Kirkovski<sup>1</sup>, Natalia Albein-Urios<sup>1</sup> Paul B. Fitzgerald<sup>6,7</sup>,  
7 Giacomo Koch<sup>8,9</sup>, Vincenzo Di Lazzaro<sup>10</sup>, Alvaro Pascual-Leone<sup>11,12,13</sup>, Peter  
8 G. Enticott<sup>1</sup>, and the ‘Big TMS Data Collaboration’

9

10 <sup>1</sup>Cognitive Neuroscience Unit, School of Psychology, Deakin University,  
11 Geelong, Australia

12 <sup>2</sup>Berenson-Allen Center for Non-Invasive Brain Stimulation, Beth Israel  
13 Deaconess Medical Center, Harvard Medical School, Boston, MA, USA

14 <sup>3</sup>Centre for Adolescent Health, Murdoch Children's Research Institute,  
15 Parkville, Australia

16 <sup>4</sup>Neuromodulation Program and Division of Epilepsy and Clinical  
17 Neurophysiology, Department of Neurology, Boston Children's Hospital,  
18 Harvard Medical School, Boston, MA, USA

19 <sup>5</sup>Department of Physical Therapy, University of Miami Miller School of  
20 Medicine, Miami, FL

21 <sup>6</sup>Monash Alfred Psychiatry Research Centre, Central Clinical School, The  
22 Alfred and Monash University, Melbourne, Australia

23 <sup>7</sup>Epworth Centre for Innovation in Mental Health, Epworth HealthCare and  
24 Central Clinical School, Melbourne, Australia

1 <sup>8</sup>Non-invasive Brain Stimulation Unit, Department of Clinical and Behavioral

2 Neurology, IRCCS Santa Lucia Foundation, Rome, Italy

3 <sup>9</sup>Department of Biomedical and Specialty Surgical Sciences, Section of

4 Human Physiology, University of Ferrara, Italy

5 <sup>10</sup>Unit of Neurology, Neurophysiology and Neurobiology, Università Campus

6 Bio-Medico, Rome, Italy

7 <sup>11</sup>Hinda and Arthur Marcus Institute for Aging Research. Hebrew SeniorLife,

8 Boston, MA, USA

9 <sup>12</sup>Department of Neurology, Harvard Medical School, Boston, MA, USA

10 <sup>13</sup>Guttmann Brain Health Institute, Institut Guttmann de Neurorehabilitació,

11 Universitat Autònoma de Barcelona, Barcelona, Spain

12

13 \*Corresponding author. Email: [daniel.corp@deakin.edu.au](mailto:daniel.corp@deakin.edu.au)

14

15

16

17

## **Abstract**

*Objective:* Interindividual variability of single and paired-pulse TMS data has limited the clinical and experimental applicability of these methods. This study brought together over 60 TMS researchers to create the largest known sample of individual participant single and paired-pulse TMS data to date, enabling a more comprehensive evaluation of factors driving response variability.

*Methods:* 118 corresponding authors provided deidentified individual TMS data. Mixed-effects regression investigated a range of individual and study level variables for their contribution to variability in response to single and pp TMS data.

*Results:* 687 healthy participant's TMS data was pooled across 35 studies. Target muscle, pulse waveform, neuronavigation use, and TMS machine significantly predicted an individual's single pulse TMS amplitude. Baseline MEP amplitude, M1 hemisphere, and biphasic AMT significantly predicted SICl response. Baseline MEP amplitude, test stimulus intensity, interstimulus interval, monophasic RMT, monophasic AMT, and biphasic RMT significantly predicted ICF response. Age, M1 hemisphere, and TMS machine significantly predicted motor threshold.

*Conclusions:* This large-scale analysis has identified a number of factors influencing participants' responses to single and paired pulse TMS. We provide specific recommendations to increase the standardisation of TMS methods within and across laboratories, thereby minimising interindividual variability in single and pp TMS data.

## 1 **Abbreviations and nomenclature**

2 TMS: Transcranial magnetic stimulation

3 MEP: motor evoked potential

4 pp: paired-pulse

5 SICI: short-interval intracortical inhibition

6 ICF: intracortical facilitation

7 IV: independent variable

8 DV: dependent variable

9 Normalised MEP: DV for SICI and ICF analyses (conditioned MEP amplitude expressed as a  
10 percentage of the baseline MEP amplitude)

11 CS: conditioning stimulus (initial pulse for paired-pulse TMS protocols)

12 TS: test stimulus (second pulse for pp TMS protocols, or unconditioned / baseline MEPs for  
13 pp protocol)

14 ISI: interstimulus interval

15 RMT: resting motor threshold

16 AMT: active motor threshold

17 Pulse waveform: monophasic or biphasic pulse waveforms

18

19

## 20 **Highlights**

21 • 687 healthy participant's TMS data was pooled across 35 studies

22 • Significant relationships between age and resting motor threshold

23 • Significant relationships between baseline MEP amplitude and

24 SICI/ICF

25

26

## 1 **1. Introduction**

2 Single and paired-pulse (pp) TMS protocols are used to measure neural  
3 excitability within the primary motor cortex (M1) (Hallett 2000). However,  
4 these measures of M1 excitability have been shown to vary significantly  
5 between individuals (Iskan et al. 2016, Orth et al. 2003). A lack of  
6 understanding of the factors driving this variability has restricted greater  
7 application of single and pp TMS as a clinical and experimental tool (Iskan et  
8 al. 2016). Many studies have investigated this issue, yet there are conflicting  
9 findings in relation to the role of individual factors such as age (Cahn et al.  
10 2003, Peinemann et al. 2001) and gender (Cahn et al. 2003, Shibuya et al.  
11 2016), and also methodological factors such as the stimulus intensity used  
12 (Cosentino et al. 2018, Ibáñez et al. 2020, Ilić et al. 2002), and the  
13 hemisphere stimulated (Ilic et al. 2004, Maeda et al. 2002). Some of these  
14 conflicting findings are likely caused by small sample sizes inherent to most  
15 single-site studies (Fried et al. 2017a, Gilbert et al. 2005). To attempt to  
16 overcome this limitation, we recently formed the ‘Big TMS Data collaboration’  
17 (Supplementary file 1) to combine individual participant TMS data across  
18 multiple studies. In the first instance, we used mixed-model regression to  
19 analyse data across 22 distinct datasets and demonstrate the variables  
20 driving interindividual variability in response to theta-burst stimulation (TBS)  
21 (Corp et al. 2020). Here we employ the same method, combining data from 35  
22 TMS studies, to investigate the factors accounting for interindividual variability  
23 in response to single and pp TMS. The collation of multiple data-sets allowed  
24 us to more thoroughly examine sources of variability demonstrated by  
25 previous single and pp TMS studies, such as age, gender, and baseline MEP

1 amplitude (Cahn et al. 2003, Shibuya et al. 2016, Strube et al. 2015), and also  
2 to further explore the possible influence of less examined variables on single  
3 and pp response, such as TMS machine, target muscle, and neuronavigation.

4

## 5 **2. Methods**

6 This project was deemed exempt from ethical review by the Deakin University  
7 Human Research Ethics Committee because it involved only the use of pre-  
8 existing, non-identifiable or re-identifiable data. All primary studies had been  
9 approved by local institutional review boards, and all participants had provided  
10 informed consent.

11

### 12 *2.1 Article identification strategy*

13 This analysis comes from a larger project collecting individual participant  
14 single and pp TMS data, input-output (I/O) curve data, and TBS data.  
15 Systematic search procedures are described in detail our companion paper  
16 (Corp et al. 2020), and the full search syntax is provided in Supplementary file  
17 2. Inclusion criteria were: studies using a figure-of-eight coil; studies  
18 measuring TMS responses from intrinsic hand muscles of humans; and  
19 studies that collected baseline and conditioned MEP amplitudes. If an article  
20 met inclusion criteria, the corresponding authors of studies were emailed to  
21 ask for participants' age, gender, motor threshold, and baseline and  
22 conditioned MEP amplitudes. Corresponding authors were asked to deidentify  
23 data prior to sending. A number of other studies were also included via  
24 informal data sharing with colleagues (Corp et al. 2020).

25

1    2.2    *Variables of interest and data used for present analyses*

2    Only healthy participant data were analysed within the present paper. To  
3    investigate interindividual variability for single pulse MEP amplitude, we used  
4    baseline MEP responses collected at 120% of RMT as our dependent  
5    variable (DV), collected across TBS, paired-pulse, and I/O curve datasets.  
6    This intensity was chosen as the DV because it was the most commonly used  
7    single-pulse TMS intensity, enabling comparison across multiple studies (see  
8    Results, Table 3). We were not able to collect sufficient input/output curve  
9    data to analyse MEP amplitudes across a range of TS intensities. For SICI  
10   and ICF, each individual's mean conditioned MEP amplitude was normalised  
11   to their mean baseline MEP amplitude ('normalised MEP') using the equation:  
12   (conditioned MEP amplitude / baseline MEP amplitude) x 100 (Amandusson  
13   et al. 2017, Di Lazzaro et al. 2006), where a value of 100% represents no  
14   change in conditioned MEP amplitudes. Note that the use of a 'normalised  
15   MEP' value or a percentage of change value (Fried et al. 2017b) (0% = no  
16   change in conditioned MEPs) provide the exact same results after regression  
17   analyses (Corp et al. 2020).

18  
19   Because MT is extensively used as a measure of corticospinal excitability  
20   (Fried et al. 2017a, Kammer et al. 2001), we also investigated interindividual  
21   variability for four types of MT for which we had data: monophasic RMT,  
22   monophasic AMT, biphasic RMT and biphasic AMT. In addition to these four  
23   MTs being used as DVs (as above), MT may also predict single and pp TMS  
24   outcomes (Amandusson et al. 2017, Chen et al. 1998), thus these four MTs  
25   were also used as independent variables (IV) for our analyses of factors

1 predicting single pulse MEP amplitude, and pp normalised MEP. Other IVs  
2 investigated were: age, gender, target muscle, M1 hemisphere, conditioning  
3 stimulus (CS) intensity, test stimulus (TS) intensity, pulse waveform (i.e.  
4 monophasic or biphasic), inter-stimulus interval (ISI), baseline MEP  
5 amplitude, the use/absence of neuronavigation, and TMS machine (Corp et  
6 al. 2020). Studies used either a Magstim 200<sup>2</sup> TMS machine, a Magstim  
7 Rapid TMS machine, a Nexstim NBS TMS, or a MagPro TMS machine. We  
8 could not determine the specific MagPro model used in all studies, therefore  
9 these machines were grouped based on the brand. We controlled for pulse  
10 waveform in regression analyses to ensure that the effect of TMS machine  
11 was not due the differential use of monophasic or biphasic pulses. For TS  
12 intensity, studies used either 120% of RMT or a machine stimulus output  
13 evoking an MEP amplitude of 0.5 mV, 0.5 - 1 mV, 1 mV MEP, or 0.5 - 1.5 mV.  
14 To increase statistical power, we grouped these intensities into machine  
15 stimulus output evoking an MEP amplitude of 0.5 - 1.5 mV. Three studies did  
16 not use a TS intensity evoking 0.5 - 1.5 mV or 120% of RMT (Corp et al.  
17 2015, Puri et al. 2016, Singh et al. 2016), and were therefore excluded from  
18 this comparison. We were not able to obtain baseline MEP amplitude data  
19 from one study (Munneke et al. 2013), thus these values were imputed as per  
20 the method of Corp et al. (2020). For studies that tested the effect of external  
21 interventions on TMS outcomes (e.g. exercise Singh et al. (2016)), only  
22 control/baseline data were analysed. We collected handedness data for 21  
23 studies, yet there were only nine left handers represented across five studies,  
24 therefore this IV could not be analysed statistically.

25



1 We verified the accuracy of the data sent to us by comparing the results to  
2 group mean data in the corresponding published paper. In cases where we  
3 could not verify based on this group mean data, corresponding authors were  
4 contacted for clarification. In instances where data could not be verified, the  
5 study was excluded (n = 1).

6

7 All statistical analyses were conducted using Stata 13.0 (StataCorp, USA).

8 First, data were checked for outliers using histograms and descriptive  
9 statistics. A number of outliers were detected in single and pp MEP data,  
10 therefore values falling outside of the 2<sup>nd</sup> and 98<sup>th</sup> percentiles were winsorized  
11 (Field 2009, Tukey 1962). Histograms prior to outlier winsorization are  
12 provided in Supplementary file 3.

13

### 14 2.3 *Variability analyses*

15 Prior to our main analyses investigating IVs predicting interindividual  
16 variability in single and pp TMS responses, we sought to characterise the  
17 variability of the data across our collected sample. As per the method of  
18 Brown et al. (2017), we calculated intraclass correlation coefficient (ICC),  
19 standard deviation (SD), and coefficient of variation (CV) (Brasil-Neto et al.  
20 1992) values to assess within study, and between study variability of single  
21 and pp TMS data. Within study SDs and CVs were calculated using the mean  
22 MEP amplitude (or MT) of participants, and between study SDs and CVs were  
23 calculated using the mean MEP amplitude (or MT) of each study (Brown et al.  
24 2017). ICC values < 0.50 were considered low; values 0.50 – 0.75 considered  
25 moderate; and > 0.75 considered high (Portney and Watkins 2009). High

1 'within study' ICC values reflect smaller variance within studies relative to  
2 larger variance between studies (Kline 2000).

3

4 Only one study (Beynel et al. 2014) assessed participants' corticospinal  
5 excitability at multiple time-points, restricting an analysis of within-participant  
6 reliability over time. Yet, with the corresponding authors' permission, we  
7 provide these (unpublished) data in Supplementary file 4.

8

#### 9 *2.4 Main regression analysis*

10 Our main analyses investigated IVs predicting the aforementioned single, pp,  
11 and MT data. To do this, we employed the same regression analyses as  
12 described in detail in Corp et al. (2020). Briefly here, we used mixed-effects  
13 linear regression using a 'one-step' model as described by Riley et al. (2010),  
14 using 'study ID' as a random factor. Some data contained multiple entries by  
15 the same participants due to studies collecting multiple data-points across  
16 certain measures, such as ISI (e.g., 2 ms and 4 ms) (Croarkin et al. 2013).  
17 Thus, in these regressions we also included a random factor of 'participant ID'  
18 to maintain the nesting of these data-points within individual participants.

19

20 We used forward-stepwise regression in two stages for each TMS protocol  
21 (Bendel and Afifi 1977). Stage 1 regressions analysed the variance explained  
22 in the DV by each IV separately, while controlling for the age and gender of  
23 participants. IVs with p-values < 0.10 were added to the regression model in  
24 stage 2, while IVs with p-values > 0.10 were dropped (Corp et al. 2020). The  
25 stage 2 starting regression model comprised of all IVs that were  $p < 0.10$  in

1 stage 1. Consecutive regressions then iterated through IVs that were dropped  
2 in stage 1, to see whether these IVs now obtained a p-value < 0.10 controlling  
3 for IVs in the starting stage 2 model. Thus, the final regression model  
4 comprised of IVs that obtained a p-value < 0.10 in predicting the DV in either  
5 stage 1 or 2 regressions (Corp et al. 2020).

6

7 IVs were omitted from regression analyses for three possible reasons. First,  
8 an IV was omitted if it was not comprised of at least three studies within each  
9 IV level, given that unreliable estimates may have resulted from a smaller  
10 number of studies per level (Corp et al. 2020). For example, the IV 'ISI' was  
11 included only if all ISIs for which we had data (e.g. for SICl: 2 ms, 2.5 ms, 3  
12 ms, and 4 ms) were used in at least three separate studies. Where some, but  
13 not all, levels of a given IV were represented across three or more studies, we  
14 compared these levels post-hoc (see below). Second, an IV was omitted if its  
15 inclusion led to a substantial reduction in the overall sample size of the  
16 regression analysis for that DV, due to that IV only being measured in a  
17 subset of studies. We defined a 'substantial reduction of the regression  
18 sample size' as cases where two or more studies were excluded from the  
19 regression analysis. Third, an IV was omitted because of collinearity, which  
20 occurred if two types of MTs were included in the same regression model. To  
21 avoid this, if two or more types of MTs had a p-value < 0.10 in stage 1  
22 regressions, for stage 2 we included only the MT that was the strongest  
23 predictor of normalised MEP for that particular regression analysis.

24

1 Given the presence of non-linearity and non-normality, robust variance  
2 estimates were used for all regressions (Graubard and Korn 1996). Adjusted  
3 marginal means (just ‘marginal means’ henceforth) estimated the mean  
4 normalised MEP amplitude adjusted/controlled for all other variables in the  
5 regression model (Williams 2012). This allowed an interpretable estimate of  
6 the mean across the sample, and also for each level of categorical IVs (e.g.  
7 the levels ‘left’ and ‘right’ for the IV ‘M1 hemisphere’) (Williams 2012).

8

### 9 2.5 *Post-hoc analyses*

10 Where sufficient data, post-hoc analyses were run on IVs that were omitted  
11 from the main regression analyses for any of the three aforementioned  
12 reasons. In relation to reason three for omission (i.e. collinearity), different  
13 types of MT were always analysed in separate regression models, to assess  
14 their independent relationship to normalised MEP. Next, post-hoc pairwise  
15 comparisons were performed on significant IVs that had 3 or more levels  
16 (given that results from IVs with only 2 levels can be interpreted from the main  
17 regression output). Given their exploratory nature, these pairwise analyses  
18 were not corrected for multiple comparisons. Finally, scatterplots indicated  
19 possible non-linear relationships between normalised MEP and some  
20 continuous variables (e.g. age). Therefore, we re-analysed all (continuous  
21 variable) relationships that were included in the final regression model, or  
22 were significant in post-hoc analyses, using quadratic and cubic regression  
23 models (Davidson and MacKinnon 1993). All post-hoc analyses controlled for  
24 all other IVs in the final regression model.

25

## 1 2.6 Additional analyses

2 A number of additional analyses were performed to further explore the data.  
3 Marginal means following single pulse regression analysis indicated that  
4 120% RMT MEP data did not reach 1 mV in amplitude. Therefore, we then  
5 assessed whether these MEP amplitudes were significantly lower in  
6 comparison to MEP amplitudes collected using the 1 mV method (i.e. stimulus  
7 intensity required to evoke a 1 mV MEP amplitude). To do this, we performed  
8 two-stage mixed-effects linear regression analysis, as above, including TS  
9 intensity (with levels of 120 RMT method and 1 mV method) as an IV. Given  
10 that controlling for other IVs may cause unwanted influence on 1 mV values,  
11 which were already adjusted by TMS operators to attain a 1 mV amplitude  
12 regardless of age, gender etc., we also repeated this analysis without the  
13 inclusion of these IVs (i.e. including only the TS intensity IV, and 'study ID'  
14 and 'Participant ID' as a random factors). This analysis did not include the  
15 imputed data of Munneke et al. (2013).

16

17 We then assessed a possible difference in MEP amplitude *variance* between  
18 these TS intensity methods. Here we used the same method as in our  
19 'variability analysis', calculating SD and CV values of single pulse MEP  
20 amplitudes, yet split the sample to analyse SD and CV separately for studies  
21 that used the 120% RMT method, and the 1 mV method. Significance  
22 between the TS intensity methods was assessed using Levene's robust test  
23 for equality of variances (Levene 1961). While lower variance may be  
24 expected for the 1mV method, given that operators specifically set the

1 machine intensity to evoke a 1mV amplitude, we still thought it valuable to  
2 quantify these (possible) differences.

3

4 Lastly, we analysed correlations between the four types of MT. Because  
5 different studies use different methods for obtaining MTs and therefore vary in  
6 their average MT values, we normalised MTs to z-values within study, then  
7 performed Pearson's correlation analyses on these z-values across the  
8 sample. This gives similar results to correlating MT values within studies, then  
9 taking the average of these correlations (Supplementary file 5).

10

### 11 **3. Results**

12 See Corp et al. (2020) for the PRISMA flowchart describing our initial  
13 systematic search. In total, 38 studies contributed individual participant data.  
14 Three studies were removed because they either included clinical populations  
15 only (2) (Kuppuswamy et al. 2015, Murdoch et al. 2016), or we were unable  
16 verify the accuracy of the sent data through email correspondence (1)  
17 (Malcolm et al. 2015). MT and single-pulse data were drawn from this larger  
18 sample of 35 studies and 687 healthy participants, which included theta-burst  
19 stimulation and I/O curve datasets in addition to pp data (Table 1). Pp TMS  
20 data were drawn from 16 studies, including 15 SICI and 14 ICF datasets  
21 comprising 295 healthy participants. Figure 1 shows the distribution of single,  
22 pp, and MT data.

23

24 < Table 1 here. Study characteristics >

25

**Table 1. Characteristics of included studies.**

| <b>Study</b> | <b>Author/s</b>             | <b>Participants</b>                                                                                                 | <b>TMS protocols</b>  |
|--------------|-----------------------------|---------------------------------------------------------------------------------------------------------------------|-----------------------|
| 1            | Barhoun (unp.)              | 13 healthy (5F, 22.1 ± 3.0 y)                                                                                       | cTBS                  |
| 2            | Beynel et al. (2014)        | 20 younger (14F, 26.4 ± 7.9 y), 19 older healthy (12F, 63.7 ± 1.7 y)                                                | SICI, ICF             |
| 3            | Busan et al., (2013)        | 40 healthy adults (12F, 26.2 ± 6.6 y)                                                                               | I/O curves            |
| 4            | Capone et al. (2009)        | 22 healthy (13F, 27.6 ± 9.0 y)                                                                                      | SICI, ICF             |
| 5            | Corp et al. (2015)          | 14 healthy (3F, 29.6 ± 6.7 y)                                                                                       | SICI, ICF             |
| 6            | Cosentino et al. (2015)     | 25 cluster headache patients (4F, 37.7 ± 10.5 y), 13 healthy (2F, 35.2 ± 11.2 y)                                    | SICI, ICF             |
| 7            | Croarkin et al. (2013)      | 24 MDD (14F, 13.9 ± 2.1 y), 22 healthy (11F, 13.8 ± 2.2 y)                                                          | SICI, ICF             |
| 8            | Di Lazzaro (unp.)           | 17 healthy (5F, 23.9 ± 5.1 y)                                                                                       | SICI, ICF             |
| 9            | Di Lazzaro et al. (2008)    | 12 stroke patients (5F, 69.4 ± 9.5 y), 12 controls (2F, 63.2 ± 5.3 y)                                               | iTBS & cTBS           |
| 10           | Di Lazzaro et al. (2011)    | 10 healthy (7F, 26.6 ± 4.1 y)                                                                                       | SICI, ICF, iTBS, cTBS |
| 11           | Dickins et al. (2015)       | 20 younger (10F, 22.9 ± 2.5 y) and 20 older participants (10F, 70.2 ± 3.1 y)                                        | iTBS                  |
| 12           | Dileone et al. (2016)       | 16 healthy (10F, 23.2 ± 3.8 y)                                                                                      | iTBS                  |
| 13           | Do et al. (2018)            | 20 healthy (14F, 26.5 ± 3.1 y)                                                                                      | cTBS                  |
| 14           | Fried et al. (2017)         | 28 type 2 diabetes patients (12F, 65.8 ± 7.7 y), 22 AD patients (13F, 69.6 ± 7.4 y), 26 healthy (13F, 62.9 ± 8.9 y) | SICI, ICF, iTBS       |
| 15           | Fuhl et al., (2015)         | 10 healthy (1F, 24.6 ± 3.9 y)                                                                                       | I/O curves            |
| 16           | Goldsworthy et al. (2016)   | 18 healthy (10F, 22.1 ± 4.4 y)                                                                                      | iTBS                  |
| 17           | Gomes-Osman (unp.)          | 17 healthy (10F, 30.0 ± 12.9 y)                                                                                     | SICI, ICF, iTBS       |
| 18           | Helm et al. (2015)          | 11 healthy (2F, 25 ± 4.3 y)                                                                                         | ICF                   |
| 19           | Hoseini et al., (2016)      | 18-40 y                                                                                                             | I/O curves            |
| 20           | Jannati et al. (2017)       | 30 healthy (3F, 36.0 ± 14.4 y)                                                                                      | cTBS                  |
| 21           | Koch et al. (2016)          | 40 AD patients (17F, 71.0 ± 6.4 y) and 24 healthy (12F, 69.3 ± 2.3 y)                                               | iTBS, cTBS            |
| 22           | Lee et al. (2014)           | 18 healthy (12F, 73.8 ± 5.1 y)                                                                                      | cTBS                  |
| 23           | Li et al. (2017)            | 26 GAD patients (13F, 42 ± 9.7 y), 35 controls (20F, 41 ± 10.6 y)                                                   | SICI, ICF             |
| 24           | McDonnell et al. (2013)     | 25 healthy (9F, 26.8 ± 8.1 y)                                                                                       | cTBS                  |
| 25           | Lücke et al., (2014)        | 9 healthy (3F, 25 ± 4.2 y)                                                                                          | I/O curves            |
| 26           | Morris (unp.)               | 15 healthy (9F, 25 ± 2.7 y)                                                                                         | SICI, ICF, iTBS       |
| 27           | Munneke et al. (2013)       | 10 ALS patients (10M, 57.8 ± 1.8 y) and 10 controls (0F, 49.0 ± 3.6 y)                                              | SICI, ICF, cTBS       |
| 28           | Nettekoven et al. (2014)    | 16 healthy (9F, 27.0 ± 3.0 y)                                                                                       | iTBS                  |
| 29           | Opie et al. (2013)          | 13 sleep apnoea patients (2F, 42.6 ± 10.2 y), 11 controls (2F, 43.0 ± 10.3 y)                                       | SICI, cTBS            |
| 30           | Opie et al. (2015)          | 13 younger (7F, 22.3 ± 3.8 y) and 15 older healthy (7F, 73.7 ± 4.0 y)                                               | SICI                  |
| 31           | Puri et al. (2016)          | 33 healthy (21F, 66.0 ± 4.8 y)                                                                                      | iTBS                  |
| 32           | Singh et al. (2016)         | 10 healthy (6F, 25.4 ± 4.0 y)                                                                                       | SICI, ICF, cTBS       |
| 33           | Vallence et al. (2015)      | 18 healthy (10F, 23.1 ± 4.0 y)                                                                                      | cTBS                  |
| 34           | Vernet et al. (2014)        | 10 healthy (5F, 33.0 ± 18.0 y)                                                                                      | cTBS                  |
| 35           | Young-Bernier et al. (2014) | 20 younger (13F, 22.3 ± 3.2 y) and 18 older healthy (9F, 70.1 ± 5.6 y)                                              | iTBS                  |

Note: age mean and standard deviation are shown. Studies without paired-pulse data were used in single pulse and/or motor threshold analyses. Abbreviations: F = females; y = years old; GAD = generalised anxiety disorder; AD = Alzheimer's disease; ALS = amyotrophic lateral sclerosis; MDD = major depressive disorder; I/O = input/output; FDI = first dorsal interosseous; APB = abductor pollicis brevis.



1 < Figure 1 here. Histograms for all protocols >

2

### 3 3.1 *Variability analyses*

4 Table 2 shows measures of reliability for all TMS outcomes. 120% of RMT

5 MEP amplitudes, SICI, and ICF demonstrated higher within, than between,

6 study variance. This is also demonstrated by low ICC values for these

7 outcomes, reflecting little grouping of within study values relative to the overall

8 sample. Consistent with previous reports (Davila-Pérez et al. 2018, Fried et al.

9 2017a), within and between study reliability was higher for MTs than the

10 aforementioned (120% of RMT) single pulse and pp TMS outcomes.

11

12 < Table 2 here – variability analysis >

13

### 14 3.2 *Single pulse TMS regression analysis*

15 The inclusion of any MT in the model would have substantially reduced the

16 regression sample size. Thus, see post-hoc analyses for these relationships.

17

18 The final regression model showed that muscle, pulse waveform, the use of

19 neuronavigation, and TMS machine were all significant predictors of 120% of

20 RMT single-pulse MEP amplitude (Table 3). See Figure 2 for single pulse

21 TMS marginal means.

22

23 < Table 3 here. Single pulse regression >

24

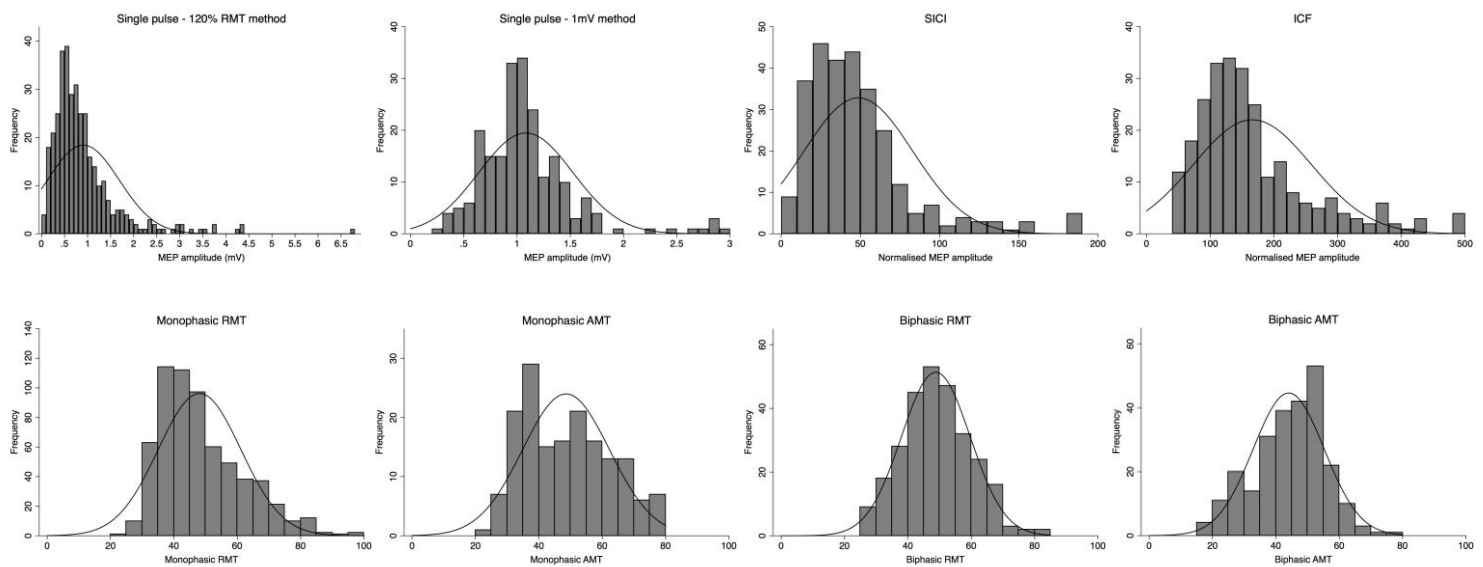

Figure 1. Distribution plots. Histograms of single pulse, paired pulse, and motor threshold data. 120% RMT data was used for single-pulse main regression analysis. These data were then compared to single pulse data using the 1 mV method in the 'additional analyses'. In addition to differences in amplitude and variance (see Results), 120% RMT data appear positively skewed, also evidenced by low median value (0.73 mV). 1 mV method data median = 1.03 mV. So that each participant was only represented once within all histograms and scatterplots (multiple data points due to some studies using multiple ISIs, muscles, etc. – see Methods) we take each participant's mean normalised MEP value across their multiple measurements. Note that in regression analyses, multiple measurements were dealt with by including 'participant ID' as a random factor – see Methods.

**Table 2. Variability of single and paired-pulse TMS data.** ICC = intraclass correlation coefficient; SD = standard deviation; CV = coefficient of variation %.

|                       | <i>ICC within studies</i> | <i>SD within studies</i> | <i>SD between studies</i> | <i>CV within studies (%)</i> | <i>CV between studies (%)</i> |
|-----------------------|---------------------------|--------------------------|---------------------------|------------------------------|-------------------------------|
| <b>120% RMT MEP</b>   | 0.14                      | 0.49                     | 0.28                      | 51.80                        | 28.52                         |
| <b>SICI</b>           | 0.10                      | 28.86                    | 14.96                     | 58.34                        | 30.95                         |
| <b>ICF</b>            | 0.10                      | 75.43                    | 38.39                     | 46.15                        | 24.23                         |
| <b>Monophasic RMT</b> | 0.50                      | 7.78                     | 9.15                      | 19.36                        | 19.67                         |
| <b>Biphasic RMT</b>   | 0.27                      | 8.47                     | 5.82                      | 17.43                        | 11.84                         |
| <b>Monophasic AMT</b> | 0.56                      | 10.16                    | 7.28                      | 17.62                        | 24.05                         |
| <b>Biphasic AMT</b>   | 0.52                      | 7.45                     | 8.16                      | 17.99                        | 19.25                         |

**Table 3. Final single pulse MEP amplitude regression model.** B-values for categorical IVs show the differences between the IV levels in mV. e.g. the APB demonstrated 0.27 mV lower MEP amplitudes than the FDI. Bold denotes significance ( $p < 0.05$ ). Participants = 341; studies = 17. \*TMS machine had 3 levels (Magstim 200<sup>2</sup>, MagPro, and Nextstim), therefore main effect:  $\chi^2 = 11.62$ ,  $df = 2$ . See post-hocs for pairwise comparisons between levels.

| <b>IV</b>           | <b>B</b> | <b>SE</b> | <b>95% CIs</b> |         | <b><math>\beta</math></b> | <b>p</b>         |
|---------------------|----------|-----------|----------------|---------|---------------------------|------------------|
| Muscle              | -0.27    | 0.11      | -0.49          | - -0.05 | -0.40                     | <b>0.016</b>     |
| Pulse waveform      | 0.30     | 0.05      | 0.20           | - 0.39  | 0.44                      | <b>&lt;0.001</b> |
| Neuronavigation use | 0.11     | 0.04      | 0.20           | - 0.03  | 0.17                      | <b>0.011</b>     |
| Machine*            |          |           |                |         |                           | <b>0.003</b>     |

1 Other IVs not included in final regression model had p-values > 0.10 in both  
2 stage 1 and 2 regressions (see Supplementary file 6 for all stage 1 and 2  
3 results).

4 < Figure 2 here. Single pulse marginal means >

5

6

### 7 3.3 *Single pulse TMS post-hoc analyses*

8 When controlling for all IVs in the final regression model, all four types of MT  
9 were significantly negatively associated with single pulse MEP amplitude at  
10 120% RMT. Monophasic RMT,  $B = -0.015$ ;  $SE = 0.004$ ;  $\beta = 0.31$ ;  $p < 0.001$   
11 (studies = 13;  $N = 248$ ). Biphasic RMT,  $B = -0.020$ ;  $SE = 0.005$ ;  $\beta = -0.31$ ;  $p <$   
12  $0.001$  (studies = 8;  $N = 174$ ). Monophasic AMT,  $B = -0.010$ ;  $SE = 0.004$ ;  $\beta = -$   
13  $0.20$ ;  $p = 0.024$  (studies = 3;  $N = 62$ ). Biphasic AMT,  $B = -0.017$ ;  $SE = 0.006$ ;  
14  $\beta = -0.29$ ;  $p = 0.005$  (studies = 9;  $N = 174$ ). Figure 3 shows bivariate  
15 relationship between single-pulse MEP amplitude and monophasic RMT.

16

17 < Figure 3 here. Single pulse scatterplot >

18

19 In addition, non-linear analyses demonstrated a significant quadratic  
20 relationship between single pulse MEP amplitude and biphasic AMT ( $p =$   
21  $0.042$ ), and significant cubic relationships between single pulse MEP  
22 amplitude and biphasic RMT, and monophasic AMT ( $p = 0.001$  and  $p = 0.010$ ,  
23 respectively) (see Supplementary file 7 for scatterplots).

24

### 25 3.4 *SICI regression analysis*

Figure2

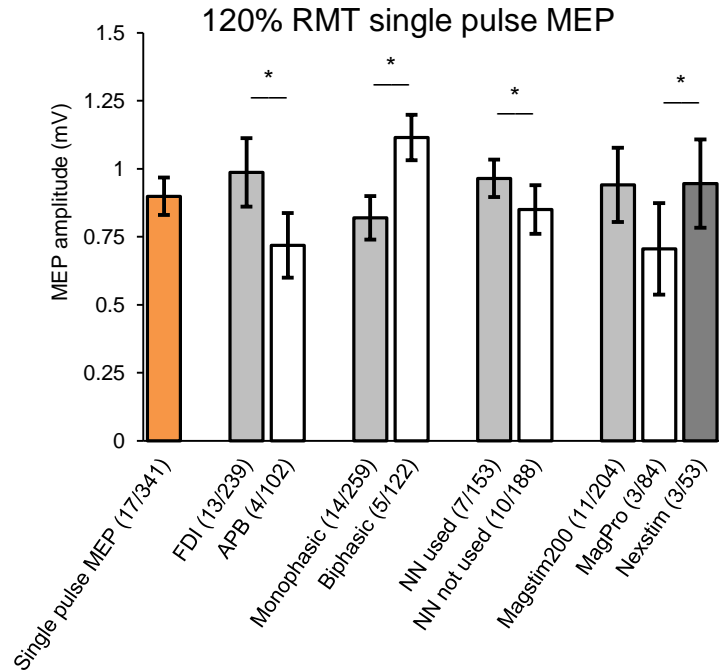

Figure 2. Marginal means for 120% RMT single pulse MEPs. Marginal means provide an estimate of normalised MEP, adjusted for all variables in the final model. Orange bar shows the overall marginal mean for single pulse MEPs. Grey and white bars show marginal means for each level of the IVs muscle, pulse waveform, neuronavigation (NN), and TMS machine. \* denotes a significant difference between levels ( $p < 0.05$ ). Error bars show 95% confidence intervals. Brackets show (studies/participants). Difference between Magstim 2002 and MagPro was close to significance ( $p = 0.078$ ).

Figure3

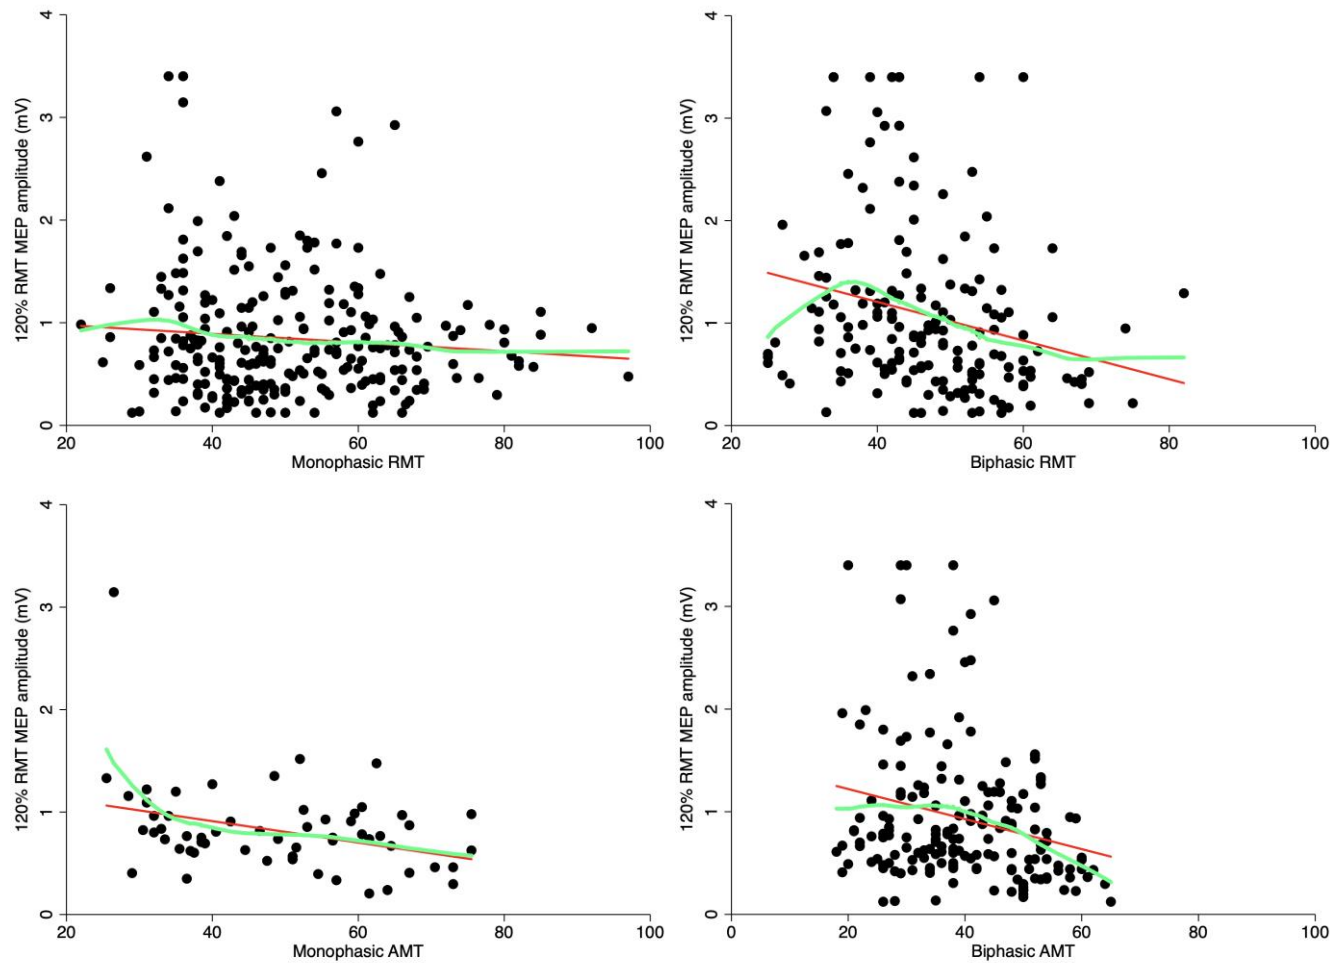

Figure 3. Relationships between 120% RMT single pulse MEPs and MTs. All relationships were significant in post-hoc regression analyses. Note that these scatterplots show raw bivariate relationships to give an indication of relationships only, see post-hoc section for results controlled for other IVs in the single pulse TMS model. Green lines fit a smoothed 'lowess' curve through data (smoothing level = 0.8, default).

1 IVs 'TMS machine', 'CS intensity', 'pulse waveform', and 'ISI' were omitted  
2 because they did not include at least three studies within each IV level, while  
3 biphasic AMT and biphasic AMT were  $p < 0.10$  in stage 1 regressions but  
4 substantially reduced regression sample size, thus were analysed post-hoc.  
5 The final SICI regression model showed that baseline MEP and M1  
6 hemisphere were both significant predictors of SICI normalised MEP (Table  
7 4). M1 hemisphere was still significant when re-analysed including only data  
8 from only right handers (from the sample in which we had handedness data)  
9 (studies = 9; N = 144; B = -9.04; SE = 2.85;  $p = 0.002$ ).

10

11 Figure 4 shows bivariate relationships for continuous IVs baseline MEP and  
12 age, which were included in the final regression model. See Figure 5 for SICI  
13 marginal means.

14

15 < Insert Table 4 here. SICI regression >

16

17 < Insert Figure 4 here. SICI scatterplots >

18

19 Other IVs not included in final regression model had p-values  $> 0.10$  in both  
20 stage 1 and 2 regressions (see Supplementary file 8 for all stage 1 and 2  
21 results).

22

23 < Figure 5. SICI marginal means >

24

25 3.5 *SICI post-hoc analyses*



**Table 4. Final SICI regression model.** B-values for continuous IVs show the amount of increase in normalised MEP, for a one unit increase in the IV, after adjusting for all other variables in the model. i.e. a 1mV increase in baseline MEP resulted in a 23.29% reduction in SICI normalised MEP (greater inhibition). Bold denotes significance ( $p < 0.05$ ). Participants = 283; studies = 15. See Figure 5 for IV levels.

| <b>IV</b>    | <b>B</b> | <b>SE</b> | <b>95% CIs</b> |         | <b><math>\beta</math></b> | <b>p</b>     |
|--------------|----------|-----------|----------------|---------|---------------------------|--------------|
| Age          | 0.11     | 0.11      | -0.11          | - 0.34  | 0.04                      | 0.334        |
| Gender       | 5.67     | 3.63      | -1.45          | - 12.78 | 0.15                      | 0.119        |
| Baseline MEP | -23.29   | 8.22      | -39.41         | - -7.17 | -0.33                     | <b>0.005</b> |
| Hemisphere   | -4.01    | 1.73      | -7.41          | - -0.62 | -0.10                     | <b>0.021</b> |

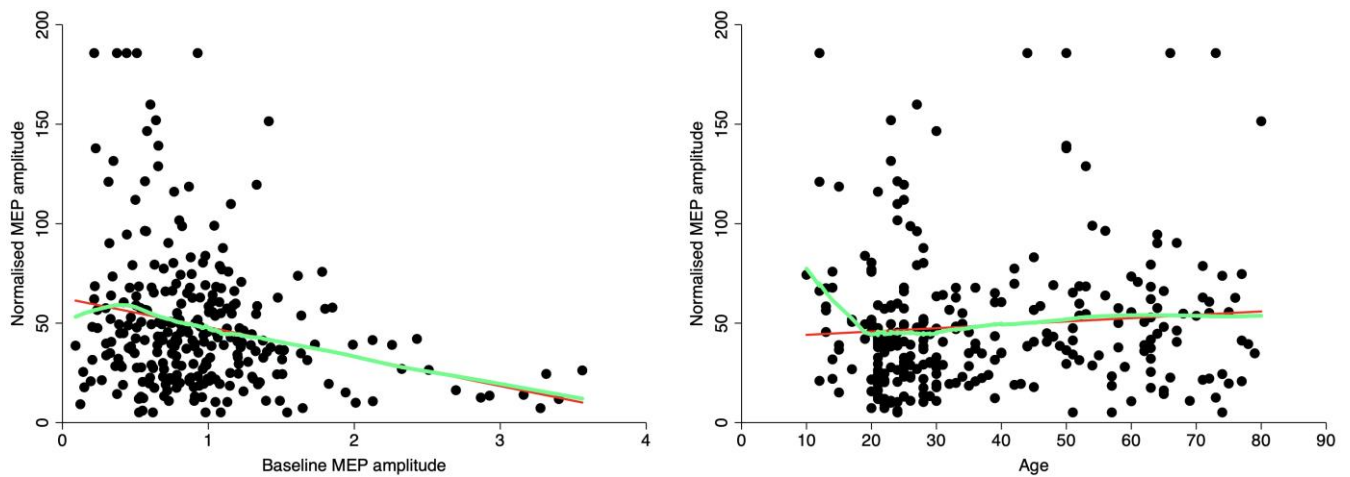

Figure 4. Relationships between continuous IVs and SICI. Baseline MEP amplitude was a significant predictor of SICI. Bivariate scatterplots give an indication of results only; see Table 4 for results controlled for other IVs. Green lines fit a smoothed 'lowess' curve through data. The appearance of a line of datapoints at the top (and to a lesser extent the bottom) of these (and other) scatterplots is due to winsorization; where small and large value outliers are converted to the value of the datapoint at the 2nd and 98th percentile (Field 2009, Tukey 1962) (see Methods).

Figure5

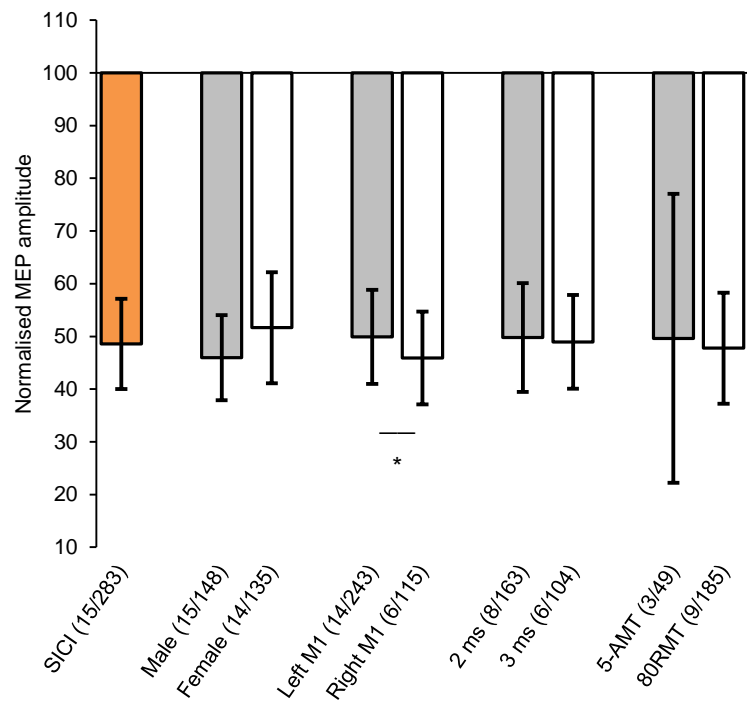

Figure 5. Marginal means for SICI normalised MEP. Orange bar shows the overall marginal mean for SICI. Grey and white bars show marginal means for each level of the IVs gender, M1 hemisphere, interstimulus interval and CS intensity (5% of machine intensity below AMT and 80% of RMT), which were included in the final model or post-hoc tests. \* denotes a significant difference between levels ( $p < 0.05$ ). All samples demonstrated significant inhibition ( $p < 0.001$ ). Error bars show 95% confidence intervals. Brackets show (studies/participants).

1 CS intensity and ISI were omitted from the main analysis, yet we had  
2 sufficient data to compare SICI normalised MEP between studies that used an  
3 intensity of 80% of RMT to those that used a machine intensity 5% below  
4 AMT (5-AMT), and also ISI of 2 ms and 3 ms (> 3 studies for these levels).  
5 Neither comparison was significant ( $p = 0.900$  and  $p = 0.778$ , respectively;  
6 Figure 5).

7

8 Biphasic AMT was a significant predictor of SICI normalised MEP when  
9 controlling for all IVs in the final model: 6 studies, 85 participants;  $B = -0.86$ ;  
10  $SE = 0.30$ ;  $\beta = -0.24$ ;  $p = 0.004$ . Biphasic RMT was not a significant predictor  
11 of normalised MEP: 3 studies, 78 participants;  $B = 0.24$ ;  $SE = 0.31$ ;  $\beta = 0.07$ ;  
12  $p = 0.426$ .

13

14 There were no significant non-linear relationships between SICI and age,  
15 baseline MEP amplitude, or biphasic AMT. Although the quadratic relationship  
16 between SICI and baseline MEP amplitude almost reached significance ( $p =$   
17  $0.053$ ).

18

### 19 3.6 ICF regression analysis

20 IVs 'TMS machine', 'CS intensity', 'pulse waveform', and 'ISI' were omitted  
21 from ICF regression due to insufficient data. The inclusion of any the MTs as  
22 IVs would have led to a substantial reduction in regression sample size,  
23 therefore these were analysed post-hoc.

24

25 < Insert Table 5 here. ICF regression

**Table 5. Final ICF regression model.** Bold denotes significance ( $p < 0.05$ ).  
Participants = 242; studies = 13. See Figure 7 for IV levels.

| <b>IV</b>    | <b>B</b> | <b>SE</b> | <b>95% CIs</b> |          | <b><math>\beta</math></b> | <b>p</b>     |
|--------------|----------|-----------|----------------|----------|---------------------------|--------------|
| Gender       | -4.46    | 8.24      | -20.61         | - 11.69  | -0.05                     | 0.588        |
| Baseline MEP | -80.82   | 32.66     | -144.83        | - -16.81 | -0.46                     | <b>0.013</b> |
| TS intensity | -33.32   | 16.43     | -65.52         | - -1.11  | -0.34                     | <b>0.043</b> |

1

2

3 The final regression model showed that baseline MEP amplitude and TS  
4 intensity (i.e. 120% RMT vs 0.5 - 1.5 mV methods) were significant predictors  
5 of ICF normalised MEP (Table 5 and Figure 6). See Figure 7 for ICF marginal  
6 means. Other IVs not included in final regression model had p-values > 0.10  
7 in both stage 1 and 2 regressions (see Supplementary file 8 for all stage 1  
8 and 2 results).

9

10 < Insert Figure 6 here. ICF scatters >

11

12 < Figure 7. ICF marginal means >

13

14

### 15 3.7 ICF post-hoc analyses

16 While CS intensity and ISI were omitted from the main analysis, we had  
17 sufficient data to compare 80% of RMT to 5-AMT CS intensities and to  
18 compare 10 ms, 12, ms, and 15 ms ISIs. The CS intensity comparison was  
19 not significant ( $p = 0.303$ ), however for ISI, there was significantly higher ICF  
20 for 12 ms ISI data compared to both 10 ms ( $p = 0.043$ ) and 15 ms ISI data ( $p$   
21 = 0.042) (Figure 7).

22

23 Of the four types of MT, only biphasic AMT was not significantly positively  
24 associated with ICF normalised MEP. Monophasic RMT,  $B = 2.09$ ;  $SE = 0.55$ ;  
25  $\beta = 0.29$ ;  $p < 0.001$  (studies = 11;  $N = 193$ ). Biphasic RMT,  $B = 1.46$ ;  $SE =$

Figure6

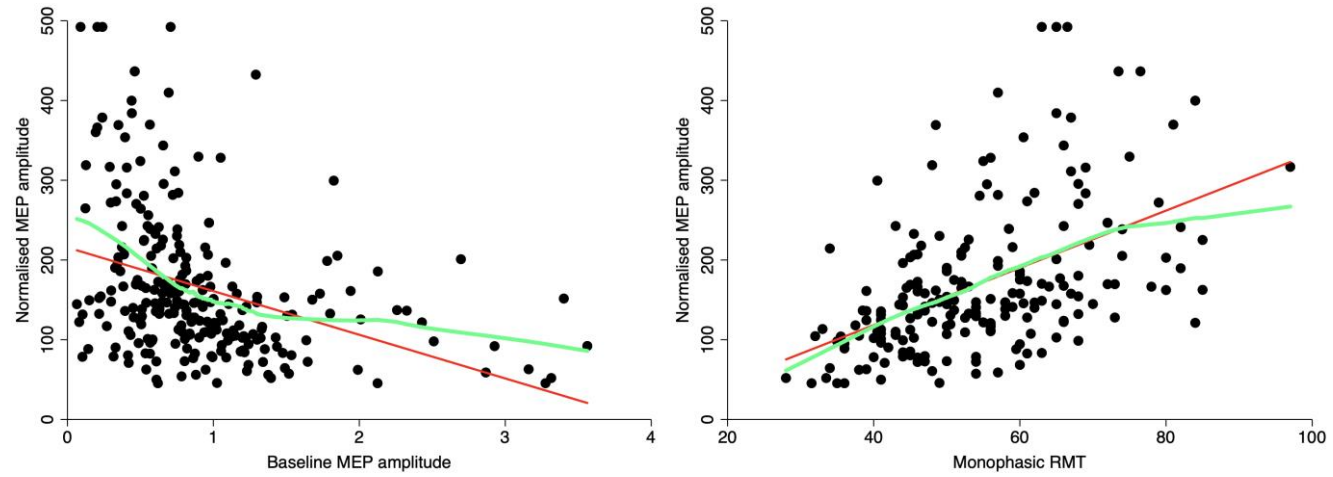

Figure 6. Relationships between continuous IVs and ICF. Baseline MEP and monophasic RMT were significant predictors of ICF MEP change. Bivariate scatterplots give an indication of results only; see Table 5 for results controlled for other IVs. Green lines fit a smoothed 'lowess' curve through data.

Figure 7

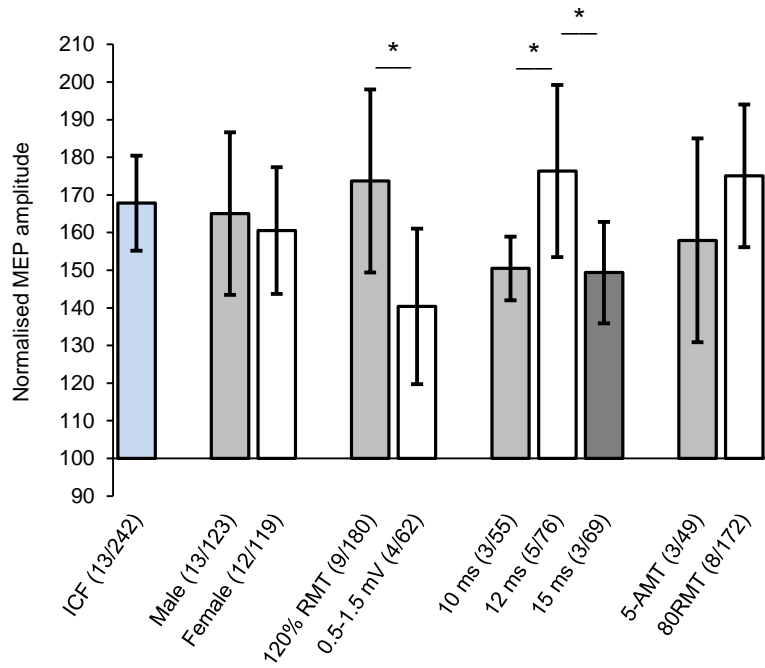

Figure 7. Marginal means for ICF normalised MEP. Blue bar shows the overall marginal mean for ICF. Grey and white bars show marginal means for each level of the IVs gender, TS intensity, ISI, and CS intensity (5% machine intensity below AMT vs. 80% of RMT) which were included in the final model or post-hoc tests. \* denotes a significant difference between levels ( $p < 0.05$ ). All samples demonstrated significant facilitation ( $p < 0.001$ ). Error bars show 95% confidence intervals. Brackets show (studies/participants).



1 0.30;  $\beta = 0.16$ ;  $p < 0.001$  (studies = 3; N = 79). Monophasic AMT, B = 1.33;

2 SE = 0.48;  $\beta = 0.19$ ;  $p < 0.005$  (studies = 3; N = 84).

3

4 Non-linear analyses demonstrated a significant quadratic and cubic

5 relationship between ICF and baseline MEP amplitude ( $p = 0.025$  and  $p =$

6 0.044, respectively) (Figure 6). There was also a significant quadratic

7 relationship between ICF and monophasic AMT ( $p = 0.001$ ), and a significant

8 cubic relationship between ICF and biphasic RMT (scatterplots in

9 Supplementary file 9).

10

### 11 3.8 *MT regression analyses*

12 Table 6 shows the four final regression models, demonstrating IVs predicting

13 each type of MT (see captions for IVs omitted due to insufficient data). Age,

14 M1 hemisphere, and TMS machine were significant predictors of different

15 types of MT. There was still higher monophasic RMT for the left hemisphere

16 when including only data from only right handers (from the restricted sample

17 in which we had handedness data), however this effect was now non-

18 significant (studies = 18; N = 319; B = -0.69; SE = 0.39;  $p = 0.079$ ). Age

19 demonstrated a significant positive relationship with monophasic RMT and

20 biphasic RMT (Figure 8). See Figure 9 for marginal means of each IV level.

21

22 < Insert Table 6 here. MT regressions >

23

24 < Insert Figure 8 here. Scatterplots MT and age >

25

**Table 6. Final MT regression models.** Separate analyses were conducted to investigate IVs explaining variability in each of the four types of MT. Bold denotes significance ( $p < 0.05$ ). IVs omitted because of insufficient data are listed below. See Figure 9 for all IV levels.

### **Monophasic RMT**

Participants = 518; studies = 26. Omitted IV: TMS machine.

| <b>IV</b>  | <b>B</b> | <b>SE</b> | <b>95% CIs</b> |         | <b><math>\beta</math></b> | <b>p</b>     |
|------------|----------|-----------|----------------|---------|---------------------------|--------------|
| Age        | 0.08     | 0.02      | 0.03           | - 0.13  | 0.12                      | <b>0.001</b> |
| Hemisphere | -2.17    | 0.89      | -3.92          | - -0.42 | -0.17                     | <b>0.015</b> |

### **Monophasic AMT**

Participants = 123; studies = 6. Omitted IVs: target muscle, TMS machine, neuronavigation.

| <b>IV</b> | <b>B</b> | <b>SE</b> | <b>95% CIs</b> |        | <b><math>\beta</math></b> | <b>p</b> |
|-----------|----------|-----------|----------------|--------|---------------------------|----------|
| Age       | 0.09     | 0.05      | -0.01          | - 0.19 | 0.12                      | 0.079    |

### **Biphasic RMT**

Participants = 258; studies = 12. Omitted IV: target muscle, M1 hemisphere. \*TMS machine had 3 levels (Magstim 200<sup>2</sup>, MagPro, and Nextstim), therefore main effect:  $\chi^2 = 24.97$ ,  $df = 2$ . See Figure 9 for pairwise comparisons between levels.

| <b>IV</b>           | <b>B</b> | <b>SE</b> | <b>95% CIs</b> |        | <b><math>\beta</math></b> | <b>p</b>         |
|---------------------|----------|-----------|----------------|--------|---------------------------|------------------|
| Age                 | 0.14     | 0.06      | 0.02           | - 0.27 | 0.25                      | <b>0.026</b>     |
| Gender              | 2.62     | 1.49      | -0.31          | - 5.55 | 0.25                      | 0.080            |
| Neuronavigation use | -2.27    | 2.16      | -1.97          | - 6.50 | 0.21                      | 0.295            |
| Machine*            |          |           |                |        |                           | <b>&lt;0.001</b> |

### **Biphasic AMT**

Participants = 277; studies = 14. Omitted IVs: M1 hemisphere, target muscle.

| <b>IV</b>           | <b>B</b> | <b>SE</b> | <b>95% CIs</b> |         | <b><math>\beta</math></b> | <b>p</b>         |
|---------------------|----------|-----------|----------------|---------|---------------------------|------------------|
| Machine             | 9.91     | 2.41      | 5.18           | - 14.63 | 0.88                      | <b>&lt;0.001</b> |
| Neuronavigation use | -3.60    | 3.32      | -2.90          | - 10.11 | 0.32                      | 0.277            |

Figure8

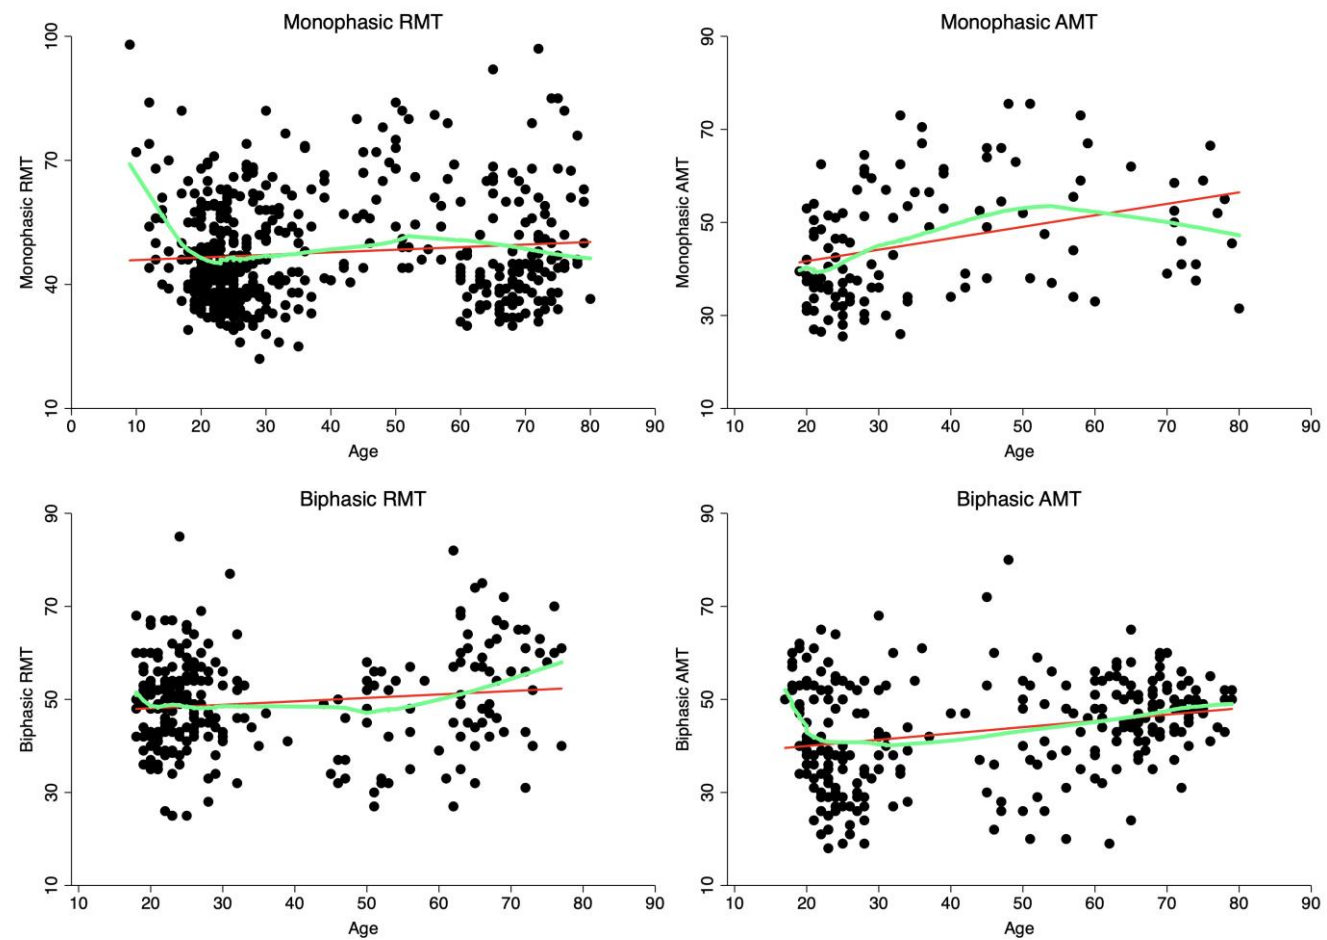

Figure 8. Relationship between age and motor threshold. Monophasic RMT and biphasic RMT showed a significant positive linear relationship with age (Table 6), indicating reduced corticospinal excitability in older adults. There were also significant non-linear relationships between age and monophasic AMT and biphasic AMT (see Results). Green lines fit a smoothed 'lowess' curve through data. Bivariate scatterplots give an indication of results only.

1

2 Other IVs not included in the final regression models had p-values > 0.10 in  
3 both stage 1 and 2 regressions (see Supplementary file 10 for all stage 1 and  
4 2 results).

5

6 < Insert Figure 9 here. MT marginal means >

7

### 8 3.9 *MT post-hoc analyses*

9 There was a significant quadratic and cubic relationship between monophasic  
10 AMT and age ( $p < 0.001$  and  $p = 0.031$ , respectively). A cubic relationship  
11 between biphasic RMT and age did not reach significance ( $p = 0.070$ ) (Figure  
12 8).

13

### 14 3.10 *Additional analyses*

15 Two stage regression analysis demonstrated a significant difference between  
16 single pulse TMS MEP amplitudes collected using 120% of RMT, compared  
17 with those collected using the 1 mV method: 120% RMT marginal mean  
18 (studies = 17;  $N = 341$ ) = 0.87 mV; 95% CIs = 0.78 – 0.96; 1 mV method  
19 marginal mean (studies = 9;  $N = 189$ ) = 1.09 mV; 95% CIs = 0.97 – 1.21;  $B =$   
20 0.22;  $SE = 0.09$ ;  $p = 0.015$ . This effect of TS intensity method was still  
21 significant when not controlling for any covariates ( $p = 0.013$ ) (see Figure 1 for  
22 histograms of both methods).

23

24 Studies that employed the 120% RMT method also displayed higher average  
25 variance between participants' MEP amplitudes: 120% RMT method studies

Figure9

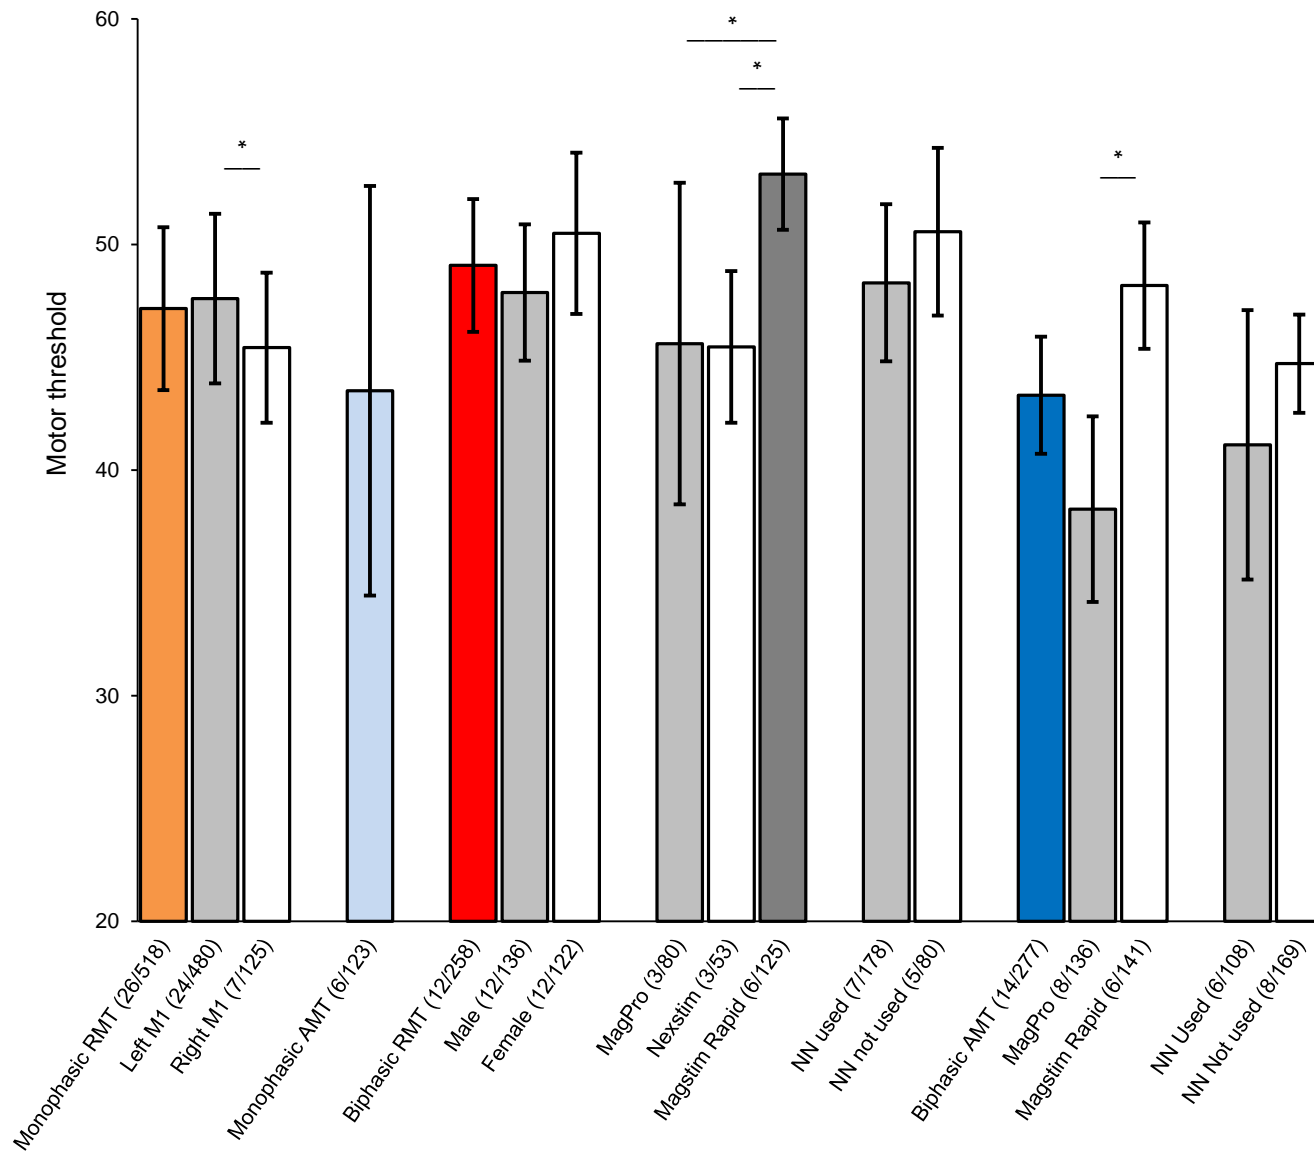

Figure 9. Marginal means for motor threshold. Coloured bars show overall marginal means for monophasic RMT, monophasic AMT, biphasic RMT, and biphasic AMT. Grey and white bars show marginal means of levels of the IVs M1 hemisphere, gender, TMS machine, and neuronavigation (NN), which were included in final regression models. \* denotes a significant difference between levels ( $p < 0.05$ ) Error bars show 95% confidence intervals. Brackets show (studies/participants).

1 average SD = 0.55 mV; average CV = 62.8%. 1 mV method studies average  
2 SD = 0.39 mV; average CV = 33.8%. Levene's robust test demonstrated that  
3 the higher MEP amplitude variance for the 120% RMT method was significant  
4 ( $F = 23.35$ ;  $df = 1, 573$ ,  $p < 0.001$ ). This lower variance for the 1mV method  
5 was expected, given that operators set the machine intensity to evoke this  
6 predefined 1mV amplitude output.

7

8 There were strong significant positive correlations between the four types of  
9 MT (all  $p < 0.001$ ): monophasic RMT x biphasic RMT,  $N = 153$ ,  $R = 0.856$ ;  
10 monophasic RMT x monophasic AMT,  $N = 123$ ,  $R = 0.933$ ; monophasic RMT  
11 x biphasic AMT,  $N = 223$ ,  $R = 0.659$ ; biphasic RMT x biphasic AMT,  $N = 83$ ,  $R$   
12  $= 0.749$ , monophasic AMT x biphasic AMT,  $N = 21$ ,  $R = 0.916$  (no  
13 observations for biphasic RMT x monophasic AMT).

14

## 15 **4. Discussion**

16 This study pooled data from 35 studies to demonstrate factors explaining  
17 interindividual variability in response to single and pp TMS. We suggest  
18 reasons for these observed sources of variability and propose specific  
19 methodological adjustments to reduce for their potential influence. We hope  
20 that these findings will lead to greater standardisation of single and pp TMS  
21 methods in the brain stimulation community, thereby increasing their utility as  
22 a clinical and experimental tool.

23

### 24 **4.1 Baseline MEP amplitude**

1 As in Corp et al. (2020), who applied the present method to TBS data, this  
2 study has demonstrated significant negative relationships between baseline  
3 MEP amplitude and (SICI and ICF) normalised MEP. That is, lower baseline  
4 responses resulted in higher amplitude conditioned MEPs, regardless of the  
5 pp TMS or TBS protocol. We suggest three main reasons as to why these  
6 relationships may occur in both pp TMS and TBS data (Corp et al. 2020):  
7 regression to the mean; floor and ceiling effects; and different cortical  
8 networks being probed between individuals. Regression to the mean is the  
9 statistical phenomenon by which an initial extreme measurement is more  
10 likely to be closer to the mean if measured for a second time (Bland and  
11 Altman 1994, Stigler 1997). By this logic, conditioned MEP responses are  
12 more likely to show facilitation (or ameliorated inhibition) if a person records  
13 extremely low baseline MEP amplitudes, and vice versa (Corp et al. 2020).  
14 Floor and ceiling effects occur when TMS intensities are too close to a floor  
15 (minimal activation) or ceiling (maximal activation of neurons), and thus  
16 further inputs fail to produce discernible changes in MEP amplitude (Devanne  
17 et al. 1997). While TS intensities are individualised, usually to 120% RMT or a  
18 1 mV value, there can be substantial variability in relation to where these  
19 stimulus intensities occur in relation to each individual's input/output curve  
20 (Goldsworthy et al. 2016b, Houdayer et al. 2008, Pitcher et al. 2015). In other  
21 words, these individualised TS intensities can be a relatively low or high  
22 between individuals. This can bias the effects of the CS, with 'inhibition' less  
23 likely for individuals with low relative TS intensities, and 'facilitation' less likely  
24 for those with high relative TS intensities (Amandusson et al. 2017,  
25 Goldsworthy et al. 2016b). If we assume that those with low baseline MEP

1 amplitudes received TMS pulses at relatively low intensities, this would agree  
2 with the negative relationship in the present study, where low baseline MEP  
3 amplitudes resulted in greater ICF effects yet ameliorated SICI effects  
4 (Figures 4 & 6). However, this is speculative given that we could not directly  
5 assess the relative stimulus intensities at which the pulses were applied.  
6 Lastly, it has been shown that TS intensity influences the cortical circuits  
7 activated by the TMS pulse (Di Lazzaro et al. 1998). Thus, if the TS intensity  
8 used for an individual does not probe the circuits activated by the initial CS,  
9 SICI and ICF may not be revealed (Di Lazzaro et al. 1998, Garry and  
10 Thomson 2009). Based on this, the negative relationship for baseline MEP  
11 amplitude in the present study may suggest that SICI is best probed by high  
12 relative TS intensities and ICF best probed by low relative TS intensities.  
13 However, this does not agree with previous research showing that SICI and  
14 ICF are maximal at moderate TS intensities (Cosentino et al. 2018, Garry and  
15 Thomson 2009). This suggests that regression to the mean and floor and  
16 ceiling effects may have been stronger influences on SICI and ICF response,  
17 however again this is speculative, given that we could not directly test the  
18 relative intensities at which the pulses were applied within individuals.

19

#### 20 *4.2 Motor threshold predicts single and paired-pulse TMS response*

21 Our data demonstrated that MT predicted single pulse MEP amplitude, SICI,  
22 and ICF response. For single pulse TMS, this is in agreement with Peterchev  
23 et al. (2013), who showed that individuals with lower MTs have steeper I/O  
24 slopes (Peterchev et al. 2013). We demonstrate a similar result here by  
25 showing that individuals with lower MTs have higher MEP amplitudes at one



1 stimulus intensity along the I/O curve (120% RMT). For SICI and ICF, this  
2 phenomenon may be in part caused by the fact that the conditioning stimulus  
3 intensity (as a percentage of the machine output) is adjusted to an individual's  
4 MT. This is designed to ensure the activation of a similar proportion of  
5 corticospinal neurons between individuals. However, SICI and ICF  
6 mechanisms are dependent on *intracortical*, rather than *corticospinal* neurons,  
7 and the threshold for activation of these two networks does not necessarily  
8 correlate (Chen et al. 1998). Thus, those with higher MTs receive a higher  
9 intensity CS (as a percentage of machine output), and this could cause  
10 stronger activation of intracortical mechanisms (Amandusson et al. 2017) (and  
11 thus an increased SICI and ICF effect, as demonstrated here). However,  
12 these relationships could also be caused by inherent differences in SICI and  
13 ICF for individuals with low or high MTs, with the differential effects of stimulus  
14 intensity and MT unable to be disentangled here due to machine output being  
15 adjusted to MT in all studies.

16

### 17 4.3 *Effect of age on corticospinal excitability*

18 Linear regression showed that, on average, monophasic RMT and biphasic  
19 AMT significantly increased with age. However, this reduction in corticospinal  
20 excitability does not appear to be linear across the lifespan, demonstrated by  
21 significant quadratic relationships for monophasic AMT, and biphasic AMT,  
22 and fitted 'lowess' lines through MT data indicating curved patterns at  
23 particular age points (Figure 8). These fitted lines suggest an initial stage of  
24 hypoexcitability for people under ~20 years of age, with MT then reaching its  
25 lowest point at about the age of 25. After this age, there seemed to be

1 different patterns in monophasic and biphasic data, with monophasic MTs  
2 increasing through middle age, then reducing again in older age, as opposed  
3 to biphasic MTs - which continued to increase with age. The divergent  
4 patterns observed in monophasic and biphasic data could be due to different  
5 cortical mechanisms activated by these pulse waveforms; biphasic pulses  
6 may activate later I-waves compared to monophasic posterior-anterior  
7 stimulation (Di Lazzaro et al. 2001). However, the pattern of activation may  
8 also depend on stimulus intensity, and the initial current direction of the  
9 biphasic pulse (Di Lazzaro et al. 2001), for which we had incomplete  
10 information. The curved pattern of response for monophasic MTs is similar to  
11 that of Shibuya et al. (2016), who demonstrated the lowest monophasic RMTs  
12 for 20-25 year olds and older adults (study age range: 20-83), and maximal  
13 RMT at approximately 50 years of age, and a significant quadratic effect.

14

15 Interestingly, the higher monophasic RMT for < 20 year olds (Figure 8) did not  
16 translate to a significant quadratic or cubic effect. This may be because the  
17 majority of these observations came from one study (Croarkin et al. 2013),  
18 and these values would have been adjusted given that we included 'study ID'  
19 as a random variable to account for the fact that data came from different  
20 studies. However, the relationships between corticospinal excitability and age  
21 observed in the present study should be interpreted with caution given the  
22 relative dearth of data for adolescents and middle-aged adults (Figure 7).

23

24 *4.4 Effect of hemisphere on cortical excitability*

1 Our results demonstrated reduced SICl and increased monophasic RMT in  
2 the left hemisphere. These effects were similar when including only data from  
3 right handers from our restricted sample for which we had handedness data  
4 (although the effect became non-significant for monophasic RMT,  $p = 0.079$ ).  
5 Thus, while we do observe these effects in right handers, we cannot say  
6 whether they are driven by the fact that the left hemisphere is the dominant  
7 M1, or whether it is simply an effect of the left hemisphere across both right  
8 and left handers. The collection of additional data from left handers will be  
9 required to answer this question. In regards to previous literature, Ilic et al.  
10 (2004), also showed reduced SICl in the left M1 in right handed participants.  
11 These authors suggested that less SICl in the dominant hemisphere for right  
12 handers may provide an advantage for the readiness and ease to carry out  
13 movements with the dominant hand (Ilic et al. 2004). In contrast, our  
14 monophasic RMT findings differ to Ilic et al. (2004), who showed *reduced*  
15 monophasic RMT in the left hemisphere for right handers. It is not clear as to  
16 why we obtained conflicting MT results. However, given our non-significant  
17 results when only including right handers, and the small sample size of Ilic et  
18 al. (2004) (9 right handers), these effects are not conclusive, and additional  
19 hemisphere and handedness data needs to be gathered.

20

#### 21 4.5 *Effect of machine on corticospinal excitability*

22 We found that Nexstim machines were more powerful than MagPro machines  
23 for single pulse MEP amplitude, yet observed higher biphasic RMT and  
24 biphasic AMT for the Magstim Rapid machine than MagPro and Nexstim  
25 machines. Much of this effect is likely due to the use of Magstim Rapid

1 machines for biphasic MT assessment prior to repetitive TMS protocols  
2 (delivered with biphasic pulses), which have a reduced power output in  
3 comparison to Magstim 200<sup>2</sup> (Kammer et al. 2001), and MagPro X100  
4 machines (Koponen et al. 2020). These differential effects highlight the  
5 importance of the inclusion of TMS machine (and study location if applicable)  
6 as a covariate in statistical analyses on data that are pooled collaboratively  
7 using different machines. Researchers should also be aware that the various  
8 configurations of the Magstim BiStim machine (i.e. two connected Magstim  
9 200<sup>2</sup> machines) produce different power outputs, which may confound  
10 electrophysiological results if configured incorrectly (Do et al. 2019). We did  
11 not collect information on these configurations in the present study, which  
12 may have affected results.

13

#### 14 4.6 *Limitations*

15 A number of limitations should be acknowledged. First, we were limited to  
16 analysing the variables that were available to us, and so could not measure  
17 the impact of IVs such as menstrual cycle (Hattemer et al. 2007), or  
18 neuroimaging markers (Silbert et al. 2006) on corticospinal excitability.  
19 Second, our approach pooled data from separate studies, and thus does not  
20 have the precision of a repeated-measures design. Pooling different studies'  
21 results increases the risk of between-study variability being caused by factors  
22 such as sampling error, study setting, and experimenter behaviour (Higgins  
23 and Green 2011). Next, of the nine studies using neuronavigation, none  
24 reported coordinates of the motor hotspot, nor coil shift data from the motor  
25 hotspot. Thus, unaccounted for differences in coil position may have

1 explained some unobserved intraindividual variability in TMS outcomes. Next,  
2 we were limited by the incomplete dataset that we could gather for  
3 handedness, and also the small number of left-handers within that dataset.  
4 Thus, we do not know whether our ‘hemisphere’ effects were driven by  
5 hemispheric differences between left and right handers, or by handedness.  
6 Next, we did not measure the potential impact of TMS machine coil size or  
7 type, or initial waveform direction (i.e. AP or PA), on cortical excitability.  
8 Finally, it should be acknowledged that a portion of interindividual variability in  
9 MEP amplitudes occurs due to differences in the excitability of spinal circuits  
10 (Kiers et al. 1993, Lackmy and Marchand-Pauvert 2010), and we could not  
11 account for this given that the included studies did not measure sub-cortical  
12 responses such as the M-max or H-reflex.

13

#### 14 *4.7 Recommendations*

15 We first propose some steps to counter the significant relationships observed  
16 between baseline MEP amplitude and SIC/ICF. To avoid regression to the  
17 mean caused by chance occurrences of high or low MEP amplitudes, we  
18 recommend that investigators: 1) collect a sufficient number (20-30) of MEPs  
19 in their TMS blocks (Chang et al. 2016, Goldsworthy et al. 2016a); 2) avoid  
20 possible initial states of hyperexcitability within TMS sessions (Brasil-Neto et  
21 al. 1994, Schmidt et al. 2009); and 3) include baseline MEP amplitude as a  
22 covariate in statistical analyses. To avoid floor and ceiling effects, the CS  
23 could be normalised to 50% of maximal inhibition/facilitation (McAllister et al.  
24 2009), while the TS could be normalised to 50% of maximal MEP amplitude  
25 (Goldsworthy et al. 2016b, Houdayer et al. 2008). This would also circumvent

1 the aforementioned issues with normalising the CS to MT (Chen et al. 1998).  
2 However, it has previously been suggested that the use of this TS intensity  
3 may still result in substantial between-subject differences in the in the neural  
4 circuits probed by the TMS pulse (i.e. relative D- and I-wave contributions to  
5 the MEP) (Goldsworthy et al. 2016b). Until this can be empirically investigated  
6 (most likely through recordings from the cervical epidural space, e.g. Di  
7 Lazzaro et al. (2001)), we recommend that researchers minimise the  
8 aforementioned biases by collecting data across a range of stimulus  
9 intensities (i.e. pp input/output curves) (Ilić et al. 2002, Orth et al. 2003).  
10 However, in addition to the increased complexity in analysing pp input/output  
11 curve data, their collection is time consuming, especially if varying both CS  
12 and TS intensities. Thus, further effort should be directed towards the  
13 formulation of time effective methods of collection of (single and) pp TMS  
14 curve data, and increased standardisation in their analysis. Next, in order to  
15 reduce possible variability due to coil position, we suggest that where  
16 neuronavigation can be used, researchers should report the coordinates of  
17 the motor hotspot, and report or analyse the impact of shifts from the motor  
18 hotspot for individual participants. Lastly, when making age comparisons,  
19 investigators should be aware that the relationship between age and  
20 corticospinal excitability may not be linear across the lifespan.

21

#### 22 4.8 Conclusions

23 The present study pooled individual participant data across 35 studies to  
24 demonstrate sources of interindividual variability in single and pp TMS  
25 measurements, including baseline MEP amplitude, age, TS intensity, M1

1 hemisphere, ISI, TMS machine, and MT. We have highlighted possible  
2 reasons for these sources of variability and made specific methodological  
3 recommendations to reduce their influence. These findings highlight the need  
4 for increased standardisation of single and pp TMS methods across the brain  
5 stimulation community, which we hope will be facilitated through this  
6 collaborative approach. We are currently expanding the 'Big TMS Data  
7 Collaboration' through the construction of an individual participant TMS data  
8 repository at [www.bigtmsdata.com](http://www.bigtmsdata.com), and welcome additional brain stimulation  
9 researchers to contribute to this database.

10

#### 11 *Acknowledgments*

12 We would like to thank all of the researchers who were kind enough to share  
13 the data that they worked so hard to collect.

14

15 *Declarations of interest: none*

16

#### 17 *Funding and disclosures*

18 A.J. was supported by postdoctoral fellowships from the Natural Sciences and  
19 Engineering Research Council of Canada (NSERC 454617) and the  
20 Canadian Institutes of Health Research (CIHR 41791). A.P.-L. was partly  
21 supported by the Sidney R. Baer Jr. Foundation, the National Institutes of  
22 Health, the National Science Foundation, and DARPA. A.P.-L. serves on the  
23 scientific advisory boards for Starlab Neuroscience, Neuroelectronics, Magstim  
24 Inc., Nexstim, and Cognito; and is listed as an inventor on several issued and  
25 pending patents on the real-time integration of transcranial magnetic

1 stimulation with electroencephalography and magnetic resonance imaging.  
2 J.G.O. was supported by the National Center for Advancing Translational  
3 Sciences of the National Institutes of Health under Award Number  
4 KL2TR002737. P.B.F. is supported by a NHMRC Practitioner Fellowship  
5 (1078567). P.B.F. has received equipment for research from MagVenture A/S,  
6 Medtronic Ltd, Neuronetics and Brainsway Ltd. and funding for research from  
7 Neuronetics. He is on scientific advisory boards for Bionomics Ltd and  
8 LivaNova and is a founder of TMS Clinics Australia. P. G. E. is supported by a  
9 Future Fellowship from the Australian Research Council (FT160100077).

10

## 11 **References**

12 Amandusson, Å, Flink, R and Axelson, HW. Comparison between adaptive  
13 and fixed stimulus paired-pulse transcranial magnetic stimulation (ppTMS) in  
14 normal subjects. *Clinical Neurophysiology Practice* 2017;2:91-97.  
15 Bendel, RB and Afifi, AA. Comparison of stopping rules in forward “stepwise”  
16 regression. *Journal of the American Statistical association* 1977;72:46-53.  
17 Beynel, L, Chauvin, A, Guyader, N, Harquel, S and Marendaz, C. Age-related  
18 changes in intracortical inhibition are mental-cognitive state-dependent. *Biol*  
19 *Psychol* 2014;101:9-12.  
20 Bland, JM and Altman, DG. Statistics notes: some examples of regression  
21 towards the mean. *BMJ* 1994;309:780.  
22 Brasil-Neto, JP, Cohen, LG and Hallett, M. Central fatigue as revealed by  
23 postexercise decrement of motor evoked potentials. *Muscle & Nerve*  
24 1994;17:713-719.



1 Brasil-Neto, JP, McShane, LM, Fuhr, P, Hallett, M and Cohen, LG.  
2 Topographic mapping of the human motor cortex with magnetic stimulation:  
3 factors affecting accuracy and reproducibility. *Electroencephalography and*  
4 *Clinical Neurophysiology/Evoked Potentials Section* 1992;85:9-16.  
5 Brown, KE, Lohse, KR, Mayer, I, Strigaro, G, Desikan, M, Casula, EP, et al.  
6 The reliability of commonly used electrophysiology measures. *Brain*  
7 *stimulation* 2017;10:1102-1111.  
8 Cahn, SD, Herzog, AG and Pascual-Leone, A. Paired-pulse transcranial  
9 magnetic stimulation: effects of hemispheric laterality, gender, and  
10 handedness in normal controls. *Journal of clinical neurophysiology*  
11 2003;20:371-374.  
12 Chang, WH, Fried, PJ, Saxena, S, Jannati, A, Gomes-Osman, J, Kim, Y-H, et  
13 al. Optimal number of pulses as outcome measures of neuronavigated  
14 transcranial magnetic stimulation. *Clinical Neurophysiology* 2016;127:2892-  
15 2897.  
16 Chen, R, Tam, A, Bütefisch, C, Corwell, B, Ziemann, U, Rothwell, JC, et al.  
17 Intracortical inhibition and facilitation in different representations of the human  
18 motor cortex. *Journal of neurophysiology* 1998;80:2870-2881.  
19 Corp, DT, Bereznicki, HGK, Clark, GM, Youssef, GJ, Fried, PJ, Jannati, A, et  
20 al. Large-scale analysis of interindividual variability in theta-burst stimulation  
21 data: results from the 'Big TMS Data Collaboration'. *Brain Stimulation*  
22 2020;13:1476-1488.  
23 Corp, DT, Rogers, MA, Di Lazzaro, V and Pearce, AJ. Intrasession Reliability  
24 of Single and Paired Pulse TMS Evoked From the Biceps Brachii

1 Representation of the Human Motor Cortex. *Brain Stimulation* 2015;8:660-  
2 661.

3 Cosentino, G, Di Marco, S, Ferlisi, S, Valentino, F, Capitano, WM, Fierro, B,  
4 et al. Intracortical facilitation within the migraine motor cortex depends on the  
5 stimulation intensity. A paired-pulse TMS study. *The journal of headache and*  
6 *pain* 2018;19:65.

7 Croarkin, PE, Nakonezny, PA, Husain, MM, Melton, T, Buyukdura, JS,  
8 Kennard, BD, et al. Evidence for increased glutamatergic cortical facilitation in  
9 children and adolescents with major depressive disorder. *JAMA psychiatry*  
10 2013;70:291-299.

11 Davidson, R and MacKinnon, JG. *Estimation and inference in econometrics*.  
12 OUP Catalogue 1993.

13 Davila-Pérez, P, Jannati, A, Fried, PJ, Cudeiro Mazaira, J and Pascual-  
14 Leone, A. The effects of waveform and current direction on the efficacy and  
15 test-retest reliability of transcranial magnetic stimulation. *Neuroscience* 2018.

16 Devanne, H, Lavoie, B and Capaday, C. Input-output properties and gain  
17 changes in the human corticospinal pathway. *Experimental brain research*  
18 1997;114:329-338.

19 Di Lazzaro, V, Oliviero, A, Mazzone, P, Insola, A, Pilato, F, Saturno, E, et al.  
20 Comparison of descending volleys evoked by monophasic and biphasic  
21 magnetic stimulation of the motor cortex in conscious humans. *Experimental*  
22 *brain research* 2001;141:121-127.

23 Di Lazzaro, V, Pilato, F, Oliviero, A, Dileone, M, Saturno, E, Mazzone, P, et al.  
24 Origin of facilitation of motor-evoked potentials after paired magnetic

1 stimulation: direct recording of epidural activity in conscious humans. Journal  
2 of neurophysiology 2006;96:1765-1771.

3 Di Lazzaro, V, Restuccia, D, Oliviero, A, Profice, P, Ferrara, L, Insola, A, et al.  
4 Effects of voluntary contraction on descending volleys evoked by transcranial  
5 stimulation in conscious humans. The Journal of Physiology 1998;508:625-  
6 633.

7 Do, M, Clark, G, Fuelscher, I, Kirkovski, M, Cerins, A, Corp, DT, et al.  
8 Magstim 2002 and Bistim Mode maximum stimulus output values not  
9 equivalent: Configuration selection is critical. Brain Stimulation: Basic,  
10 Translational, and Clinical Research in Neuromodulation 2019.

11 Do, M, Kirkovski, M, Davies, CB, Bekkali, S, Byrne, LK and Enticott, PG. Intra-  
12 and Inter-Regional Priming of Ipsilateral Human Primary Motor Cortex With  
13 Continuous Theta Burst Stimulation Does Not Induce Consistent Neuroplastic  
14 Effects. Frontiers in human neuroscience 2018;12:123.

15 Field, A. Discovering statistics using SPSS, Sage publications; 2009.

16 Fried, PJ, Jannati, A, Davila-Pérez, P and Pascual-Leone, A. Reproducibility  
17 of single-pulse, paired-pulse, and intermittent theta-burst TMS measures in  
18 healthy aging, type-2 diabetes, and Alzheimer's disease. Frontiers in aging  
19 neuroscience 2017a;9:263.

20 Fried, PJ, Schilberg, L, Brem, A-K, Saxena, S, Wong, B, Cypess, AM, et al.  
21 Humans with type-2 diabetes show abnormal long-term potentiation-like  
22 cortical plasticity associated with verbal learning deficits. Journal of  
23 Alzheimer's Disease 2017b;55:89-100.

- 1 Garry, M and Thomson, RH. The effect of test TMS intensity on short-interval  
2 intracortical inhibition in different excitability states. *Experimental brain*  
3 *research* 2009;193:267-274.
- 4 Gilbert, DL, Sallee, FR, Zhang, J, Lipps, TD and Wassermann, EM.  
5 Transcranial magnetic stimulation-evoked cortical inhibition: a consistent  
6 marker of attention-deficit/hyperactivity disorder scores in tourette syndrome.  
7 *Biological psychiatry* 2005;57:1597-1600.
- 8 Goldsworthy, M, Hordacre, B and Ridding, M. Minimum number of trials  
9 required for within-and between-session reliability of TMS measures of  
10 corticospinal excitability. *Neuroscience* 2016a;320:205-209.
- 11 Goldsworthy, MR, Vallence, AM, Hodyl, NA, Semmler, JG, Pitcher, JB and  
12 Ridding, MC. Probing changes in corticospinal excitability following theta burst  
13 stimulation of the human primary motor cortex. *Clin Neurophysiol*  
14 2016b;127:740-747.
- 15 Graubard, BI and Korn, EL. Modelling the sampling design in the analysis of  
16 health surveys. *Statistical methods in medical research* 1996;5:263-281.
- 17 Hallett, M. Transcranial magnetic stimulation and the human brain. *Nature*  
18 2000;406:147-150.
- 19 Hattemer, K, Knake, S, Reis, J, Rochon, J, Oertel, WH, Rosenow, F, et al.  
20 Excitability of the motor cortex during ovulatory and anovulatory cycles: a  
21 transcranial magnetic stimulation study. *Clinical endocrinology* 2007;66:387-  
22 393.
- 23 Higgins, JP and Green, S. *Cochrane Handbook for Systematic Reviews of*  
24 *Interventions*. 5.1.0. 2011, from [www.cochrane-handbook.org](http://www.cochrane-handbook.org).

- 1 Houdayer, E, Degardin, A, Cassim, F, Bocquillon, P, Derambure, P and  
2 Devanne, H. The effects of low-and high-frequency repetitive TMS on the  
3 input/output properties of the human corticospinal pathway. *Experimental*  
4 *Brain Research* 2008;187:207-217.
- 5 Ibáñez, J, Spampinato, DA, Paraneetharan, V and Rothwell, JC. SICI during  
6 changing brain states: Differences in methodology can lead to different  
7 conclusions. *Brain Stimulation* 2020;13:353-356.
- 8 Ilic, TV, Jung, P and Ziemann, U. Subtle hemispheric asymmetry of motor  
9 cortical inhibitory tone. *Clinical Neurophysiology* 2004;115:330-340.
- 10 Ilić, TV, Meintzschel, F, Cleff, U, Ruge, D, Kessler, KR and Ziemann, U.  
11 Short-interval paired-pulse inhibition and facilitation of human motor cortex:  
12 the dimension of stimulus intensity. *The Journal of Physiology* 2002;545:153-  
13 167.
- 14 Iscan, Z, Nazarova, M, Fedele, T, Blagovechtchenski, E and Nikulin, VV. Pre-  
15 stimulus alpha oscillations and inter-subject variability of motor evoked  
16 potentials in single-and paired-pulse TMS paradigms. *Frontiers in human*  
17 *neuroscience* 2016;10:504.
- 18 Kammer, T, Beck, S, Thielscher, A, Laubis-Herrmann, U and Topka, H. Motor  
19 thresholds in humans: a transcranial magnetic stimulation study comparing  
20 different pulse waveforms, current directions and stimulator types. *Clinical*  
21 *neurophysiology* 2001;112:250-258.
- 22 Kiers, L, Cros, D, Chiappa, K and Fang, J. Variability of motor potentials  
23 evoked by transcranial magnetic stimulation. *Electroencephalography and*  
24 *Clinical Neurophysiology/Evoked Potentials Section* 1993;89:415-423.
- 25 Kline, P. *The handbook of psychological testing*, Psychology Press; 2000.

1 Koponen, LM, Goetz, SM, Tucci, DL and Peterchev, AV. Sound comparison  
2 of seven TMS coils at matched stimulation strength. *Brain Stimulation* 2020.  
3 Kuppuswamy, A, Clark, EV, Turner, IF, Rothwell, JC and Ward, NS. Post-  
4 stroke fatigue: a deficit in corticomotor excitability? *Brain* 2015;138:136-148.  
5 Lackmy, A and Marchand-Pauvert, V. The estimation of short intra-cortical  
6 inhibition depends on the proportion of spinal motoneurons activated by  
7 corticospinal inputs. *Clinical neurophysiology* 2010;121:612-621.  
8 Levene, H. Robust tests for equality of variances. *Contributions to probability*  
9 *and statistics. Essays in honor of Harold Hotelling* 1961:279-292.  
10 Maeda, F, Gangitano, M, Thall, M and Pascual-Leone, A. Inter-and intra-  
11 individual variability of paired-pulse curves with transcranial magnetic  
12 stimulation (TMS). *Clinical neurophysiology* 2002;113:376-382.  
13 Malcolm, MP, Vaughn, HN and Greene, DP. Inhibitory and excitatory motor  
14 cortex dysfunction persists in the chronic poststroke recovery phase. *J Clin*  
15 *Neurophysiol* 2015;32:251-256.  
16 McAllister, S, Rothwell, J and Ridding, MJCN. Selective modulation of  
17 intracortical inhibition by low-intensity Theta Burst Stimulation. 2009;120:820-  
18 826.  
19 Munneke, MA, Rongen, JJ, Overeem, S, Schelhaas, HJ, Zwartz, MJ and  
20 Stegeman, DF. Cumulative effect of 5 daily sessions of theta burst stimulation  
21 on corticospinal excitability in amyotrophic lateral sclerosis. *Muscle Nerve*  
22 2013;48:733-738.  
23 Murdoch, K, Buckley, JD and McDonnell, MN. The effect of aerobic exercise  
24 on neuroplasticity within the motor cortex following stroke. *PloS one*  
25 2016;11:e0152377.

- 1 Orth, M, Snijders, A and Rothwell, J. The variability of intracortical inhibition  
2 and facilitation. *Clinical Neurophysiology* 2003;114:2362-2369.
- 3 Peinemann, A, Lehner, C, Conrad, B and Siebner, HR. Age-related decrease  
4 in paired-pulse intracortical inhibition in the human primary motor cortex.  
5 *Neuroscience letters* 2001;313:33-36.
- 6 Peterchev, AV, Goetz, SM, Westin, GG, Luber, B and Lisanby, SH. Pulse  
7 width dependence of motor threshold and input–output curve characterized  
8 with controllable pulse parameter transcranial magnetic stimulation. *Clinical*  
9 *Neurophysiology* 2013;124:1364-1372.
- 10 Pitcher, JB, Doeltgen, SH, Goldsworthy, MR, Schneider, LA, Vallence, A-M,  
11 Smith, AE, et al. A comparison of two methods for estimating 50% of the  
12 maximal motor evoked potential. *Clinical Neurophysiology* 2015;126:2337-  
13 2341.
- 14 Portney, LG and Watkins, MP. *Foundations of clinical research: applications*  
15 *to practice*, Pearson/Prentice Hall; 2009.
- 16 Puri, R, Hinder, MR, Canty, AJ and Summers, JJ. Facilitatory non-invasive  
17 brain stimulation in older adults: the effect of stimulation type and duration on  
18 the induction of motor cortex plasticity. *Experimental brain research*  
19 2016;234:3411-3423.
- 20 Riley, RD, Lambert, PC and Abo-Zaid, G. Meta-analysis of individual  
21 participant data: rationale, conduct, and reporting. *Bmj* 2010;340:c221.
- 22 Schmidt, S, Cichy, RM, Kraft, A, Brocke, J, Irlbacher, K and Brandt, SA. An  
23 initial transient-state and reliable measures of corticospinal excitability in TMS  
24 studies. *Clinical Neurophysiology* 2009;120:987-993.

- 1 Shibuya, K, Park, SB, Geevasinga, N, Huynh, W, Simon, NG, Menon, P, et al.  
2 Threshold tracking transcranial magnetic stimulation: Effects of age and  
3 gender on motor cortical function. *Clinical Neurophysiology* 2016;127:2355-  
4 2361.
- 5 Silbert, L, Nelson, C, Holman, S, Eaton, R, Oken, B, Lou, J, et al. Cortical  
6 excitability and age-related volumetric MRI changes. *Clinical neurophysiology*  
7 2006;117:1029-1036.
- 8 Singh, AM, Duncan, RE and Staines, WR. Aerobic exercise abolishes cTBS-  
9 induced suppression of motor cortical excitability. *Neurosci Lett*  
10 2016;633:215-219.
- 11 Stigler, SM. Regression towards the mean, historically considered. *Statistical*  
12 *methods in medical research* 1997;6:103-114.
- 13 Strube, W, Bunse, T, Malchow, B and Hasan, A. Efficacy and interindividual  
14 variability in motor-cortex plasticity following anodal tDCS and paired-  
15 associative stimulation. *Neural plasticity* 2015;2015.
- 16 Tukey, JW. The future of data analysis. *The annals of mathematical statistics*  
17 1962;33:1-67.
- 18 Williams, R. Using the margins command to estimate and interpret adjusted  
19 predictions and marginal effects. *The Stata Journal* 2012;12:308-331.  
20  
21



### **Collaboration members:**

Daniel T. Corp, Hannah G. K. Bereznicki, Gillian M. Clark, George J. Youssef, Peter J. Fried, Ali Jannati, Charlotte B. Davies, Joyce Gomes-Osman, Julie Stamm, Sung Wook Chung, Steven J. Bowe, Nigel C. Rogasch, Paul B. Fitzgerald, Giacomo Koch, Vincenzo Di Lazzaro, Alvaro Pascual-Leone, Peter G. Enticott, Pamela Barhoun, Natalia Albein-Urios, Melissa Kirkovski, Lysianne Beynel, Hannah J. Block, Filippo Brighina, Pierpaolo Busan, Fioravante Capone, Benjamin W. X. Chong, Guiseppe Cosentino, Paul E. Croarkin, Zafiris J. Daskalakis, Daina S. E. Dickins, Michele Dileone, Michael Do, Luciano Fadiga, Anna Fuhl, Mitchell R. Goldsworthy, Christian Grefkes, Fabian Helm, Najmeh Hoseini, Annapoorna Kuppuswamy, Cheng-Ta Li, Wei-Chen Lin, Caroline Lucke, Christian Marendaz, Alessandro Martorana, Michelle N. McDonnell, Moniek A. M. Munneke, Kate Murdoch, Charlotte Nettekoven, George M. Opie, Paolo Profice, Rohan Puri, Federico Ranieri, Michael C. Ridding, Stephan Riek, John G. Semmler, Amaya M Singh, W Richard Staines, Dick F. Stegeman, Cathy M. Stinear, Jeffery J. Summers, Pietro A. Tonali, François Tremblay, Liam J. Wallace, Nick S. Ward, Ann-Maree Vallence, Marine Vernet, Woo-Kyoung Yoo, Marielle Young-Bernier, Juho Joutsa, Andris Cerins, Ulf Ziemann, Alison Canty, Mark R. Hinder, Timothy P. Morris, Christian Hyde, Wolnei Caumo

## Supplementary file 2. Search syntax.

Search ((intermittent theta-burst stimulation OR intermittent theta burst stimulation OR iTBS)) AND (Transcranial magnetic stimulation OR TMS) Filters: Publication date from 2013/01/01 to 2016/12/31. Results = 126

((continuous theta-burst stimulation OR continuous theta burst stimulation OR cTBS)) AND (Transcranial magnetic stimulation OR TMS) Filters: Publication date from 2012/01/01 to 2016/12/31 Results = 239

((short-interval intracortical inhibition OR short interval intracortical inhibition OR SICI)) AND (Transcranial magnetic stimulation OR TMS) Filters: Publication date from 2014/01/01 to 2016/12/31. Results = 218

((intracortical facilitation OR ICF)) AND (Transcranial magnetic stimulation OR TMS) Filters: Publication date from 2014/01/01 to 2016/12/31. Results = 152

((input-output curve\* OR stimulus-response curve\* OR I-O curve\* OR IO curve\* OR S-R curve\* OR SR curve\*)) AND (Transcranial magnetic stimulation OR TMS) Filters: Publication date from 2013/01/01 to 2016/12/31. Results = 69

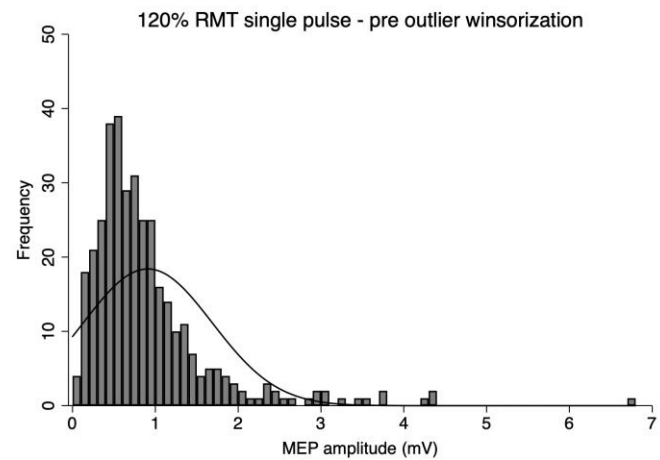

**Supplementary file 3. Distribution plots.** Histograms show distribution of MEP data for single pulse, SICI and ICF protocols, prior to outlier winsorization.

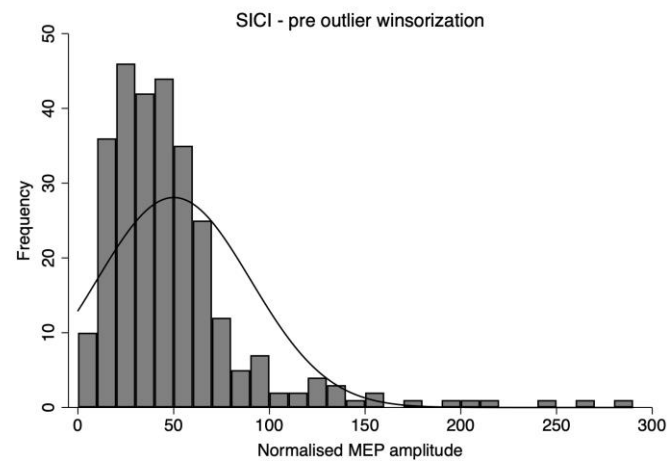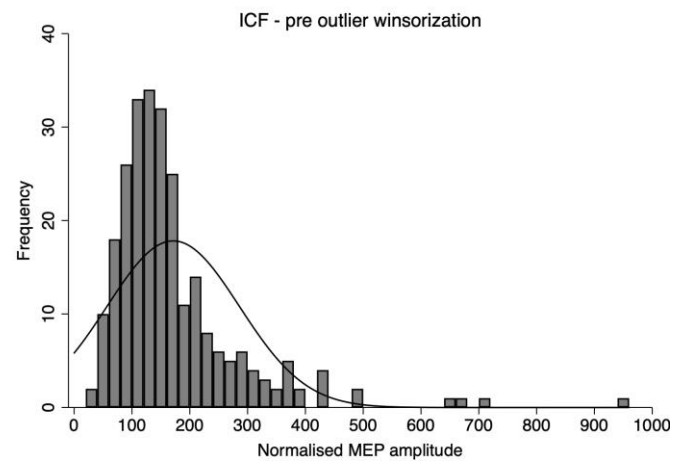

## **Supplementary file 4: Reproducibility data from Beynel et al. (2014)**

### **Methods**

Test-retest data were taken from 35 healthy participants (19 females; mean age: 44.67 ± 20.12) at a month interval. Single pulse MEP data were assessed at 120% of RMT, while SICl and ICF were assessed at 80% and 120% of RMT, for conditioning and test stimuli, respectively, with interstimulus intervals of 2 ms (SICl) and 15 ms (ICF). Ten MEPs were collected per condition, per session. Please see the published study (Beynel et al., 2014) for further methodological details. As in the main manuscript (Corp et al.), for SICl and ICF, each individual's mean conditioned MEP amplitude was normalised to their mean baseline MEP amplitude.

### **Results**

The intraclass correlation coefficients (McGraw et al., 1996) for each TMS protocol were as follows: biphasic RMT = 0.845; single pulse MEP amplitude = 0.375; ICF = 0.376; and SICl = 0.367.

### **References**

- Beynel L, Chauvin A, Guyader N, Harquel S, Marendaz C. Age-related changes in intracortical inhibition are mental-cognitive state-dependent. *Biol Psychol* 2014; 101: 9-12.
- McGraw KO, Wong S. Forming inferences about some intraclass correlation coefficients. *Psychological methods* 1996; 1: 30.

**Supplementary file 5.** The use of z-scores grouped by study to run correlation analyses. Table shows an example of this method, using the correlations between monophasic RMT and biphasic RMT.

| <b>Study</b>                                                                              | <b>R-value</b>    |
|-------------------------------------------------------------------------------------------|-------------------|
| Dickins et al. (2015)                                                                     | 0.913             |
| Do et al. (2018)                                                                          | 0.880             |
| Fried et al. (2016)                                                                       | 0.902             |
| Goldsworthy et al. (2016)                                                                 | 0.904             |
| Gomes-Osman (unpublished)                                                                 | 0.826             |
| Nettekoven et al. (2014)                                                                  | 0.607             |
| Vallence et al. (2015)                                                                    | 0.838             |
| Average R-value across studies                                                            | <hr/> 0.839 <hr/> |
| R-value of correlated z-scores across sample, first grouped by study (used in manuscript) | 0.856             |
| *R-value of correlated MTs across sample (without obtaining z-scores grouped by study)    | 0.127             |

\*We include this analysis to demonstrates the importance of using z-scores to calculate these correlations. If not, variance is caused by the different methods used for obtaining MTs between studies.

\*Step 1 regressions for 120% RMT single pulse MEP amplitude. Examining the variance in MEP amplitudes explained by each IV separately, while controlling for the age and gender of participants.

Abbreviations:

MEP change = Normalised MEP (DV)  
 Age  
 Gender  
 BaseMEP\_wins = 120% RMT single pulse MEP amplitude  
 Machine\_spulse = TMS machine  
 Muscle = Target muscle  
 Hemisphere = M1 hemisphere  
 ppCSint = paired pulse conditioning stimulus intensity  
 ppTSint = paired pulse test stimulus intensity  
 PulseType/PulseType2 = Pulse waveform  
 ISI = interstimulus interval  
 MonoRMT = Monophasic RMT  
 MonoAMT = Monophasic AMT  
 BiRMT = Biphasic RMT  
 BiAMT = Biphasic AMT  
 TSint\_comparison = denotes the analysis of 120% RMT data  
 Studyno = Study ID  
 newPartID = Participant ID

\*IVs omitted because of insufficient data (did not include at least three studies within each IV level):

Machine Muscle PulseType2 MonoRMT MonoAMT BiRMT BiAMT

```
.
. for var Hemisphere Muscle Machine_spulse PulseType2 Neuronavigation
MonoRMT BiRM
> T MonoAMT BiAMT : mixed BaseMEP_wins Age Gender c.X if
TSint_comparison ==0 ///
> || Studyno: || newPartID:,robust norettable

-> mixed BaseMEP_wins Age Gender c.Hemisphere if TSint_comparison ==0 ||
Studyno: |
> | newPartID:,robust norettable
```

Performing EM optimization:

Performing gradient-based optimization:

```
Iteration 0: log pseudolikelihood = -429.45103
Iteration 1: log pseudolikelihood = -429.43954
Iteration 2: log pseudolikelihood = -429.43954
```

Computing standard errors:

```
Mixed-effects regression          Number of obs    =
462
```

```
-----
Group Variable |      No. of      Observations per Group
                |      Groups      Minimum   Average   Maximum
-----+-----
      Studyno  |          17          10      27.2      70
    newPartID |         347           1       1.3       2
-----
```

```
Wald chi2(3) =
1.78
Log pseudolikelihood = -429.43954    Prob > chi2 =
0.6190
```

(Std. Err. adjusted for 17 clusters in Studyno)

```
-----
BaseMEP_wins |      Coef.      Robust      z      P>|z|      [95% Conf.
Interval]
-----+-----
Age |  -.0027805   .0033584   -0.83   0.408   -.0093628
.0038019
Gender | -.0087345   .0740265   -0.12   0.906   -.1538238
.1363548
Hemisphere | .0273188   .0333839    0.82   0.413   -.0381124
.09275
_cons |  .9897414   .1289038    7.68   0.000   .7370946
1.242388
-----
```

```
-> mixed BaseMEP_wins Age Gender c.Muscle if TSint_comparison ==0 ||
Studyno: || ne
> wPartID:,robust norettable
```

Performing EM optimization:

Performing gradient-based optimization:

```
Iteration 0: log pseudolikelihood = -434.6118
Iteration 1: log pseudolikelihood = -434.59578
Iteration 2: log pseudolikelihood = -434.59578
```





| Group Variable | No. of Groups | Observations per Group |         |         |
|----------------|---------------|------------------------|---------|---------|
|                |               | Minimum                | Average | Maximum |
| Studyno        | 17            | 10                     | 26.8    | 70      |
| newPartID      | 341           | 1                      | 1.3     | 2       |

Wald chi2(3) = 38.91  
 Log pseudolikelihood = -414.93492 Prob > chi2 = 0.0000

(Std. Err. adjusted for 17 clusters in Studyno)

|                | Coef.     | Robust Std. Err. | z     | P> z  | [95% Conf. Interval]  |
|----------------|-----------|------------------|-------|-------|-----------------------|
| Age            | -.0038426 | .0028052         | -1.37 | 0.171 | -.0093407<br>.0016555 |
| Gender         | -.0293734 | .0699193         | -0.42 | 0.674 | -.1664127<br>.1076658 |
| Machine_spulse | .2408224  | .0420787         | 5.72  | 0.000 | .1583496<br>.3232951  |
| _cons          | .9272276  | .1144897         | 8.10  | 0.000 | .702832<br>1.151623   |

```
-> mixed BaseMEP_wins Age Gender c.PulseType2 if TSint_comparison ==0 || Studyno: |
> | newPartID:,robust noretale
```

Performing EM optimization:

Performing gradient-based optimization:

Iteration 0: log pseudolikelihood = -424.34173  
 Iteration 1: log pseudolikelihood = -424.33683  
 Iteration 2: log pseudolikelihood = -424.33683

Computing standard errors:

Mixed-effects regression Number of obs = 474

| Group Variable | No. of Groups | Observations per Group |         |         |
|----------------|---------------|------------------------|---------|---------|
|                |               | Minimum                | Average | Maximum |

| Studyno   | 18  | 10 | 26.3 | 70 |
|-----------|-----|----|------|----|
| newPartID | 359 | 1  | 1.3  | 2  |

Wald chi2(3) = 177.91  
 Log pseudolikelihood = -424.33683 Prob > chi2 = 0.0000

(Std. Err. adjusted for 18 clusters in Studyno)

|            | Coef.     | Robust Std. Err. | z     | P> z  | [95% Conf. Interval] |
|------------|-----------|------------------|-------|-------|----------------------|
| Age        | -.0031481 | .0029437         | -1.07 | 0.285 | -.0089176 .0026214   |
| Gender     | .0034524  | .0689223         | 0.05  | 0.960 | -.1316327 .1385376   |
| PulseType2 | .3376344  | .0334713         | 10.09 | 0.000 | .2720318 .403237     |
| _cons      | .926825   | .1191044         | 7.78  | 0.000 | .6933845 1.160265    |

```
-> mixed BaseMEP_wins Age Gender c.Neuronavigation if TSint_comparison ==0 || Study > no: || newPartID:,robust noretale
```

Performing EM optimization:

Performing gradient-based optimization:

Iteration 0: log pseudolikelihood = -434.25844  
 Iteration 1: log pseudolikelihood = -434.24201  
 Iteration 2: log pseudolikelihood = -434.24201

Computing standard errors:

Mixed-effects regression Number of obs = 474

| Group Variable | No. of Groups | Observations per Group |         |         |
|----------------|---------------|------------------------|---------|---------|
|                |               | Minimum                | Average | Maximum |
| Studyno        | 18            | 10                     | 26.3    | 70      |
| newPartID      | 359           | 1                      | 1.3     | 2       |

13.74 Wald chi2(3) =  
 Log pseudolikelihood = -434.24201 Prob > chi2 =  
 0.0033

(Std. Err. adjusted for 18 clusters in Studyno)

```
-----
```

| BaseMEP_wins    | Coef.     | Robust Std. Err. | z     | P> z  | [95% Conf. Interval] |
|-----------------|-----------|------------------|-------|-------|----------------------|
| Age             | -.0028702 | .0028519         | -1.01 | 0.314 | -.0084598            |
| Gender          | -.0052331 | .0692731         | -0.08 | 0.940 | -.141006             |
| Neuronavigation | -.29488   | .0954175         | -3.09 | 0.002 | -.4818949            |
| _cons           | 1.180095  | .112362          | 10.50 | 0.000 | .959869              |

```
-----
```

```
-> mixed BaseMEP_wins Age Gender c.MonoRMT if TSint_comparison ==0 ||
Studyno: || n
> ewPartID:,robust noretale
```

Performing EM optimization:

Performing gradient-based optimization:

```
Iteration 0: log pseudolikelihood = -278.81131
Iteration 1: log pseudolikelihood = -278.80319
Iteration 2: log pseudolikelihood = -278.80319
```

Computing standard errors:

Mixed-effects regression Number of obs =  
 363

```
-----
```

| Group Variable | No. of Groups | Observations per Group |         |         |
|----------------|---------------|------------------------|---------|---------|
|                |               | Minimum                | Average | Maximum |
| Studyno        | 13            | 11                     | 27.9    | 70      |
| newPartID      | 248           | 1                      | 1.5     | 2       |

```
-----
```

44.03 Wald chi2(3) =

Log pseudolikelihood = -278.80319                      Prob > chi2                      =  
 0.0000

(Std. Err. adjusted for 13 clusters in Studyno)

```
-----
-----
BaseMEP_wins |          Coef.      Robust          z    P>|z|    [95% Conf.
Interval]     Std. Err.
-----+-----
Age |      .0030643    .0029831    1.03   0.304   -.0027824
.008911
Gender |    -.0092131    .0532958   -0.17   0.863   -.113671
.0952448
MonoRMT |   -.0146129    .0028081   -5.20   0.000   -.0201167  -
.0091092
_cons |    1.490094    .1688795    8.82   0.000    1.159097
1.821092
-----
-----
```

```
-> mixed BaseMEP_wins Age Gender c.BiRMT if TSint_comparison ==0 ||
Studyno: || new
> PartID:,robust noretale
```

Performing EM optimization:

Performing gradient-based optimization:

```
Iteration 0:  log pseudolikelihood = -235.75133
Iteration 1:  log pseudolikelihood = -235.56781
Iteration 2:  log pseudolikelihood = -235.56733
Iteration 3:  log pseudolikelihood = -235.56733
```

Computing standard errors:

Mixed-effects regression                                      Number of obs                      =  
 214

```
-----
-----
Group Variable |          No. of          Observations per Group
                Groups      Minimum   Average   Maximum
-----+-----
Studyno |              8              10      26.8      51
newPartID |             174              1       1.2       2
-----
-----
```

14.59                                                              Wald chi2(3)                      =  
 Log pseudolikelihood = -235.56733                              Prob > chi2                      =  
 0.0022

(Std. Err. adjusted for 8 clusters in Studyno)

```
-----
-----
BaseMEP_wins |          Coef.      Robust          z    P>|z|    [95% Conf.
Interval]-----
-----
      Age |  -.0014456   .0035162   -0.41   0.681   -.0083372
.005446
      Gender |   .0284975   .1527012    0.19   0.852   -.2707914
.3277864
      BiRMT |  -.0193975   .0052949   -3.66   0.000   -.0297753  -
.0090197
      _cons |   2.029973   .2791479    7.27   0.000    1.482853
2.577093
-----
-----
```

```
-> mixed BaseMEP_wins Age Gender c.MonoAMT if TSint_comparison ==0 ||
Studyno: || n
> ewPartID:,robust noretale
```

Performing EM optimization:

Performing gradient-based optimization:

```
Iteration 0:  log pseudolikelihood = -67.441544
Iteration 1:  log pseudolikelihood = -67.389585
Iteration 2:  log pseudolikelihood = -67.371305
Iteration 3:  log pseudolikelihood = -67.37035
Iteration 4:  log pseudolikelihood = -67.37035
```

Computing standard errors:

```
Mixed-effects regression                               Number of obs    =
124
```

```
-----
-----
Group Variable |          No. of      Observations per Group
                Groups      Minimum   Average   Maximum
-----+-----
      Studyno |           3           20      41.3     70
      newPartID |          62            2       2.0      2
-----
-----
```

```
Wald chi2(2) =
.
Log pseudolikelihood = -67.37035      Prob > chi2 =
.
```

(Std. Err. adjusted for 3 clusters in Studyno)

```

-----
-----
BaseMEP_wins |          Coef.      Robust          z    P>|z|    [95% Conf.
Interval]
-----+-----
Age |    -.0032472    .0024551    -1.32    0.186    -.0080591
.0015647
Gender |    .0360827    .0363064     0.99    0.320    -.0350766
.107242
MonoAMT |   -.0079267    .0029001    -2.73    0.006    -.0136109  -
.0022425
_cons |    1.295731    .2591768     5.00    0.000     .7877538
1.803708
-----
-----

```

```

-> mixed BaseMEP_wins Age Gender c.BiAMT if TSint_comparison ==0 ||
Studyno: || new
> PartID:,robust norettable

```

Performing EM optimization:

Performing gradient-based optimization:

```

Iteration 0:  log pseudolikelihood = -204.47578
Iteration 1:  log pseudolikelihood = -204.45425
Iteration 2:  log pseudolikelihood = -204.45425

```

Computing standard errors:

```

Mixed-effects regression          Number of obs    =
214

```

```

-----
Group Variable |      No. of      Observations per Group
                |      Groups      Minimum   Average   Maximum
-----+-----
Studyno |           9           10      23.8      51
newPartID |          174           1       1.2       2
-----

```

```

Wald chi2(3) =
34.74
Log pseudolikelihood = -204.45425    Prob > chi2 =
0.0000

```

(Std. Err. adjusted for 9 clusters in Studyno)

```

-----
-----
|          Robust

```

| BaseMEP_wins | Coef.     | Std. Err. | z     | P> z  | [95% Conf. Interval] |
|--------------|-----------|-----------|-------|-------|----------------------|
| Age          | .002146   | .0024305  | 0.88  | 0.377 | -.0026177            |
| Gender       | -.0775646 | .08062    | -0.96 | 0.336 | -.2355768            |
| BiAMT        | -.0154547 | .0026378  | -5.86 | 0.000 | -.0206247            |
| _cons        | 1.515444  | .2121489  | 7.14  | 0.000 | 1.099639             |

\*Step 2 regressions for single pulse.

\*This is the starting step 2 model for single pulse - all variables that obtained a p-value < 0.10 in stage 1 regressions.

```
. mixed BaseMEP_wins i.Muscle i.Machine_spulse i.PulseType2
i.Neuronavigation if TSint_comparison ==0 || ///
    Studyno: || newPartID:,robust cformat(%5.4f)
```

Performing EM optimization:

Performing gradient-based optimization:

```
Iteration 0: log pseudolikelihood = -404.44997
Iteration 1: log pseudolikelihood = -404.31675
Iteration 2: log pseudolikelihood = -404.31339
Iteration 3: log pseudolikelihood = -404.3133
Iteration 4: log pseudolikelihood = -404.3133
```

Computing standard errors:

Mixed-effects regression Number of obs = 456

| Group Variable | No. of Groups | Observations per Group |         |         |
|----------------|---------------|------------------------|---------|---------|
|                |               | Minimum                | Average | Maximum |
| Studyno        | 17            | 10                     | 26.8    | 70      |

```

newPartID |          341          1          1.3          2
-----
Wald chi2(5)          =
864.57
Log pseudolikelihood = -404.3133      Prob > chi2          =
0.0000

```

(Std. Err. adjusted for 17 clusters in Studyno)

```

-----
BaseMEP_wins |          Coef.      Robust      z      P>|z|      [95% Conf.
Interval]
-----+-----
Muscle
  APB |      -0.2685      0.1112     -2.41     0.016     -0.4865
-0.0504
Machine_spulse
  MagPro |      -0.2358      0.1340     -1.76     0.078     -0.4984
0.0269
  Nexstim |       0.0045      0.1347      0.03     0.973     -0.2594
0.2684
PulseType2
  Biphasic |       0.2955      0.0488      6.05     0.000      0.1998
0.3912
Neuronavigation
  No |      -0.1146      0.0448     -2.56     0.011     -0.2025
-0.0267
  _cons |       1.0168      0.1112      9.14     0.000      0.7987
1.2348
-----

```

```

-----
Random-effects Parameters |          Estimate      Robust      [95% Conf.
Interval]
-----+-----
Studyno: Identity
  var(_cons) |          0.0004      0.0121      0.0000
5.1e
newPartID: Identity
  var(_cons) |          0.3334      0.0853      0.2020
0.5505

```



```

-----+-----
-----
                                var(Residual) |      0.0992      0.0105      0.0805
0.1221
-----
-----

```

```

.
. *Iterating

```

```

. mixed BaseMEP_wins i.Muscle i.Machine_spulse i.PulseType2
i.Neuronavigation Age i
> f TSint_comparison ==0 || Studyno: || newPartID:,robust
cformat(%5.4f)

```

Performing EM optimization:

Performing gradient-based optimization:

```

Iteration 0:  log pseudolikelihood = -403.41713
Iteration 1:  log pseudolikelihood = -403.16827
Iteration 2:  log pseudolikelihood = -403.16497
Iteration 3:  log pseudolikelihood = -403.16497

```

Computing standard errors:

```

Mixed-effects regression                                Number of obs      =
456

```

```

-----+-----
Group Variable |      No. of      Observations per Group
                |      Groups      Minimum      Average      Maximum
-----+-----
      Studyno |           17           10           26.8           70
newPartID |           341            1            1.3            2
-----+-----

```

```

                                                                Wald chi2(6)      =
4381.19
Log pseudolikelihood = -403.16497                                Prob > chi2      =
0.0000

```

(Std. Err. adjusted for 17 clusters in Studyno)

```

-----+-----
BaseMEP_wins |      Coef.      Robust      z      P>|z|      [95% Conf.
Interval]
-----+-----

```

|        |                       |         |        |       |       |         |
|--------|-----------------------|---------|--------|-------|-------|---------|
| 0.0080 | Muscle APB            | -0.2258 | 0.1193 | -1.89 | 0.058 | -0.4596 |
| 0.1045 | Machine_spulse MagPro | -0.1602 | 0.1351 | -1.19 | 0.236 | -0.4250 |
| 0.4305 | Nexstim               | 0.1092  | 0.1639 | 0.67  | 0.505 | -0.2120 |
| 0.3845 | PulseType2 Biphasic   | 0.2980  | 0.0441 | 6.75  | 0.000 | 0.2115  |
| 0.0645 | Neuronavigation No    | -0.0672 | 0.0672 | -1.00 | 0.317 | -0.1990 |
| 0.0028 | Age                   | -0.0032 | 0.0031 | -1.04 | 0.299 | -0.0092 |
| 1.2887 | _cons                 | 1.0603  | 0.1165 | 9.10  | 0.000 | 0.8319  |

-----  
-----

-----  
-----

| Random-effects Parameters | Estimate | Robust Std. Err. | [95% Conf. Interval] |
|---------------------------|----------|------------------|----------------------|
| Studyno: Identity         |          |                  |                      |
| var(_cons)                | 0.0000   | .                | .                    |
| newPartID: Identity       |          |                  |                      |
| var(_cons)                | 0.3307   | 0.0800           | 0.2059               |
| var(Residual)             | 0.0993   | 0.0105           | 0.0807               |

-----  
-----

```

. mixed BaseMEP_wins i.Muscle i.Machine_spulse i.PulseType2
i.Neuronavigation i. Gen
> der if TSint_comparison ==0 || ///
> Studyno: || newPartID:,robust cformat(%5.4f)

```

Performing EM optimization:



```

      Female |    -0.0074    0.0713   -0.10   0.917   -0.1472
0.1323
      _cons |     1.0205    0.1234    8.27   0.000    0.7786
1.2624
-----
-----
-----

```

```

-----
-----
-----
Random-effects Parameters |      Estimate   Robust
Std. Err.   [95% Conf.
Interval]
-----+-----

```

```

-----
Studyno: Identity |
      var(_cons) |      0.0004    0.0120    0.0000
5.1e
-----+-----

```

```

-----
newPartID: Identity |
      var(_cons) |      0.3335    0.0853    0.2019
0.5507
-----+-----

```

```

-----
      var(Residual) |      0.0992    0.0105    0.0805
0.1221
-----+-----
-----

```

```

.
. mixed BaseMEP_wins i.Muscle i.Machine_spulse i.PulseType2
i.Neuronavigation i. Hem
> isphere if TSint_comparison ==0 || ///
> Studyno: || newPartID:,robust cformat(%5.4f)

```

Performing EM optimization:

Performing gradient-based optimization:

```

Iteration 0: log pseudolikelihood = -396.44941
Iteration 1: log pseudolikelihood = -396.35985
Iteration 2: log pseudolikelihood = -396.35867
Iteration 3: log pseudolikelihood = -396.35867

```

Computing standard errors:

```

Mixed-effects regression                               Number of obs   =
444

```

```

-----
Group Variable |      No. of      Observations per Group
Groups         Minimum   Average   Maximum
-----+-----
      Studyno |          16          10      27.8      70

```

| newPartID                                       | 329                               | 1         | 1.3          | 2          |
|-------------------------------------------------|-----------------------------------|-----------|--------------|------------|
| -----                                           |                                   |           |              |            |
|                                                 |                                   |           | Wald chi2(6) | =          |
| 998.22                                          | Log pseudolikelihood = -396.35867 |           | Prob > chi2  | =          |
| 0.0000                                          |                                   |           |              |            |
| (Std. Err. adjusted for 16 clusters in Studyno) |                                   |           |              |            |
| -----                                           |                                   |           |              |            |
|                                                 |                                   | Robust    |              |            |
| BaseMEP_wins                                    | Coef.                             | Std. Err. | z            | P> z       |
| Interval]                                       |                                   |           |              | [95% Conf. |
| -----                                           |                                   |           |              |            |
| Muscle                                          |                                   |           |              |            |
| APB                                             | -0.2591                           | 0.1245    | -2.08        | 0.037      |
| -0.0151                                         |                                   |           |              | -0.5030    |
| Machine_spulse                                  |                                   |           |              |            |
| MagPro                                          | -0.2296                           | 0.1467    | -1.57        | 0.117      |
| 0.0579                                          |                                   |           |              | -0.5171    |
| Nexstim                                         | 0.0141                            | 0.1458    | 0.10         | 0.923      |
| 0.2999                                          |                                   |           |              | -0.2717    |
| PulseType2                                      |                                   |           |              |            |
| Biphasic                                        | 0.2966                            | 0.0485    | 6.12         | 0.000      |
| 0.3916                                          |                                   |           |              | 0.2017     |
| Neuronavigation                                 |                                   |           |              |            |
| No                                              | -0.1213                           | 0.0419    | -2.89        | 0.004      |
| -0.0392                                         |                                   |           |              | -0.2034    |
| Hemisphere                                      |                                   |           |              |            |
| R                                               | 0.0210                            | 0.0329    | 0.64         | 0.524      |
| 0.0854                                          |                                   |           |              | -0.0435    |
| _cons                                           | 1.0074                            | 0.1245    | 8.09         | 0.000      |
| 1.2513                                          |                                   |           |              | 0.7634     |
| -----                                           |                                   |           |              |            |
| -----                                           |                                   |           |              |            |

. \*Final model

```
. mixed BaseMEP_wins i.Muscle i.Machine_spulse i.PulseType2
i.Neuronavigation if TSint_comparison ==0 || ///
```



|         |       |  |         |        |       |       |         |
|---------|-------|--|---------|--------|-------|-------|---------|
| -0.0267 | No    |  | -0.1146 | 0.0448 | -2.56 | 0.011 | -0.2025 |
| 1.2348  | _cons |  | 1.0168  | 0.1112 | 9.14  | 0.000 | 0.7987  |

-----  
-----

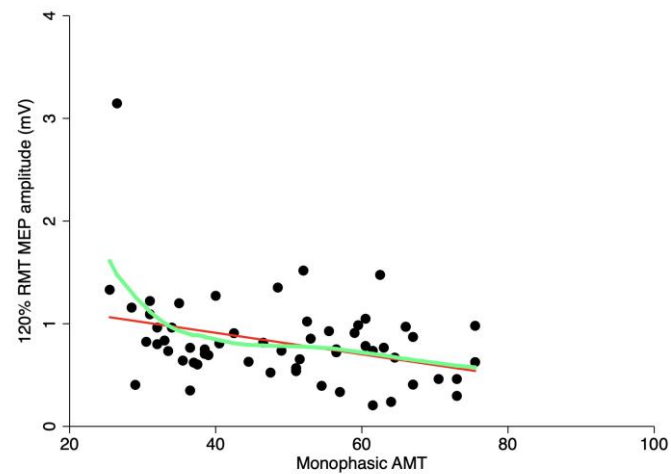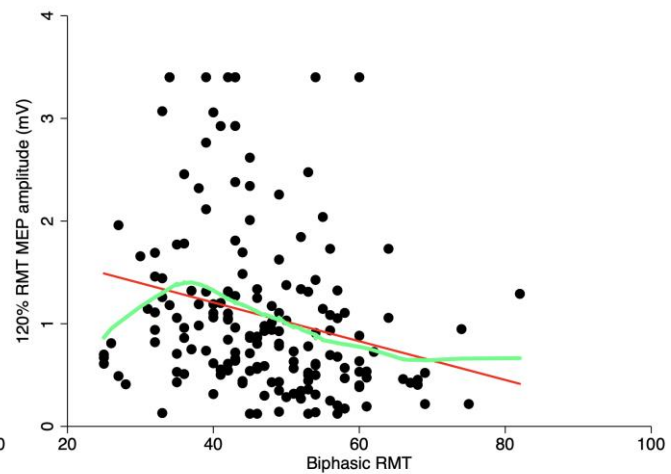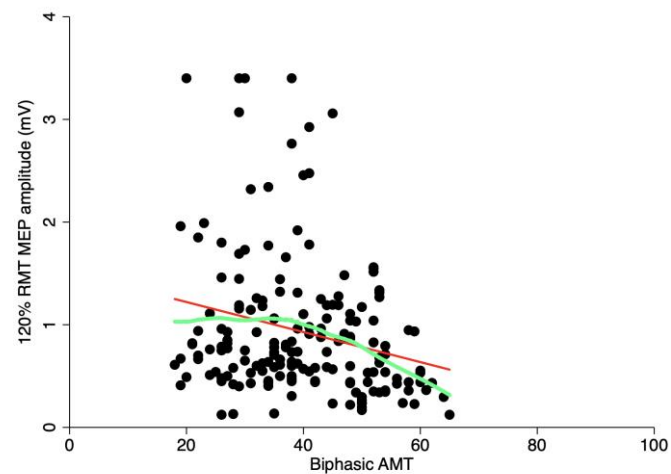

**Supplementary file 7. Non-linear relationships for 120% RMT single pulse MEP amplitude.** Post-hoc analyses demonstrated significant non-linear relationships between single pulse MEP amplitude and monophasic AMT, biphasic RMT, and biphasic AMT.



\*Step 1 regressions for SICI. Examining the variance in SICI explained by each IV separately, while controlling for the age and gender of participants.

Abbreviations:

MEP change = Normalised MEP (DV)  
 Age  
 Gender  
 BaseMEP = Baseline MEP amplitude  
 Machine\_ppulse = TMS machine  
 Muscle = Target muscle  
 Hemisphere = M1 hemisphere  
 ppCSint = paired pulse conditioning stimulus intensity  
 ppTSint = paired pulse test stimulus intensity  
 PulseType/PulseType2/ppPulseType = Pulse waveform  
 ISI = interstimulus interval  
 MonoRMT = Monophasic RMT  
 MonoAMT = Monophasic AMT  
 BiRMT = Biphasic RMT  
 BiAMT = Biphasic AMT  
 Mono\_cmb = Monophasic MT combined  
 Bi\_cmb = Biphasic MT combined  
 RMTcmb = RMT combined  
 AMTcmb = AMT combined  
 MTcmb = MT combined  
 TSint\_comparison = denotes the analysis of 120% RMT data  
 Studyno = Study ID  
 newPartID = Participant ID

\*IVs omitted because of insufficient data (did not include at least three studies within each IV level):  
 Machine ppCSint PulseType ISI

```
. for var      BaseMEP Muscle Hemisphere ppTSint Neuronavigation
MonoRMT BiRMT MonoAMT BiAMT: mixed
>             MEPchange c.X Age Gender if Protocol == 0 &
Dx==0 || Studyno: || newPartID:,robust
```

```
-> mixed MEPchange c.BaseMEP Age Gender if Protocol == 0 & Dx==0 ||
Studyno: || new
> PartID:,robust
```

Performing EM optimization:



```

                                var(_cons) |    211.1977    79.42076    101.0638
441.3499
-----+-----
----
newPartID: Identity           |
                                var(_cons) |    449.2635    100.4846    289.8124
696.4426
-----+-----
----
                                var(Residual) |    679.1771    155.2948    433.865
1063.191
-----+-----
-----

```

```

-> mixed MEPchange c.Muscle Age Gender if Protocol == 0 & Dx==0 ||
Studyno: || newP
> artID:,robust

```

Performing EM optimization:

Performing gradient-based optimization:

```

Iteration 0:  log pseudolikelihood = -2268.3673
Iteration 1:  log pseudolikelihood = -2268.3479
Iteration 2:  log pseudolikelihood = -2268.3479

```

Computing standard errors:

```

Mixed-effects regression                                Number of obs    =
456

```

```

-----+-----
Group Variable |      No. of      Observations per Group
                |      Groups      Minimum   Average   Maximum
-----+-----
      Studyno  |           15           10      30.4      70
    newPartID |          283            1       1.6       4
-----+-----

```

```

                                                                Wald chi2(3)    =
4.10
Log pseudolikelihood = -2268.3479                            Prob > chi2     =
0.2505

```

(Std. Err. adjusted for 15 clusters in Studyno)

```

-----+-----
MEPchange      |      Robust
                |      Coef.   Std. Err.      z    P>|z|    [95% Conf.
Interval]
-----+-----

```



|           |     |    |      |    |
|-----------|-----|----|------|----|
| Studyno   | 15  | 10 | 30.4 | 70 |
| newPartID | 283 | 1  | 1.6  | 4  |

-----

Wald chi2(3) = 16.12  
 Prob > chi2 = 0.0011  
 Log pseudolikelihood = -2267.3419

(Std. Err. adjusted for 15 clusters in Studyno)

| MEPchange Interval] | Coef.     | Robust Std. Err. | z     | P> z  | [95% Conf. Interval] |
|---------------------|-----------|------------------|-------|-------|----------------------|
| Hemisphere          | -5.273922 | 1.748358         | -3.02 | 0.003 | -8.700641 - 1.847202 |
| Age                 | .220899   | .1200631         | 1.84  | 0.066 | -.0144204 .4562183   |
| Gender              | 3.494108  | 3.30978          | 1.06  | 0.291 | -2.992941 9.981156   |
| _cons               | 40.70547  | 7.366821         | 5.53  | 0.000 | 26.26676 55.14417    |

| Random-effects Parameters | Estimate | Robust Std. Err. | [95% Conf. Interval] |
|---------------------------|----------|------------------|----------------------|
| Studyno: Identity         |          |                  |                      |
| var(_cons)                | 139.5504 | 69.44456         | 52.61957 370.0966    |
| newPartID: Identity       |          |                  |                      |
| var(_cons)                | 532.0593 | 147.2917         | 309.2568 915.3788    |
| var(Residual)             | 742.8034 | 195.1739         | 443.8315 1243.168    |

```
-> mixed MEPchange c.pptSint Age Gender if Protocol == 0 & Dx==0 ||
Studyno: || new
> PartID:,robust
```



```

Studyno: Identity |
                var(_cons) | 123.4359 45.64036 59.80123
254.7844
-----+-----
----
newPartID: Identity |
                var(_cons) | 554.4496 152.2201 323.721
949.6276
-----+-----
----
                var(Residual) | 757.9096 202.9583 448.4115
1281.026
-----+-----
-----

```

```

-> mixed MEPchange c.Neuronavigation Age Gender if Protocol == 0 & Dx==0
|| Studyno
> : || newPartID:,robust

```

Performing EM optimization:

Performing gradient-based optimization:

```

Iteration 0: log pseudolikelihood = -2268.3452
Iteration 1: log pseudolikelihood = -2268.3259
Iteration 2: log pseudolikelihood = -2268.3259

```

Computing standard errors:

```

Mixed-effects regression          Number of obs   =
456

```

```

-----+-----
Group Variable | No. of      Observations per Group
                | Groups      Minimum   Average   Maximum
-----+-----
Studyno       | 15          10        30.4      70
newPartID     | 283         1         1.6       4
-----+-----

```

```

3.78
Log pseudolikelihood = -2268.3259      Wald chi2(3)      =
0.2866                                Prob > chi2      =

```

(Std. Err. adjusted for 15 clusters in Studyno)

```

-----+-----
MEPchange     | Coef.      Robust      z    P>|z|    [95% Conf.
Interval]    | Std. Err.
-----+-----

```

```

Neuronavigation | -2.980393  7.835779  -0.38  0.704  -18.33824
12.37745
      Age | .2272705  .1231058  1.85  0.065  -.0140124
.4685535
      Gender | 3.33641  3.282533  1.02  0.309  -3.097236
9.770055
      _cons | 41.2268  9.153757  4.50  0.000  23.28577
59.16783

```

-----

-----

```

Random-effects Parameters | Estimate      Robust      [95% Conf.
Interval]          Std. Err.
-----+-----

```

```

Study: Identity          |
      var(_cons) | 150.0159    66.1064    63.24769
355.8197
-----+-----

```

```

newPartID: Identity     |
      var(_cons) | 529.4786   146.6327   307.6936
911.126
-----+-----

```

```

      var(Residual) | 747.3772   197.8844   444.8009
1255.781
-----+-----

```

-----

```

-> mixed MEPchange c.MonoRMT Age Gender if Protocol == 0 & Dx==0 ||
Study: || new
> PartID:,robust

```

Performing EM optimization:

Performing gradient-based optimization:

```

Iteration 0:  log pseudolikelihood = -2027.8725
Iteration 1:  log pseudolikelihood = -2027.8662
Iteration 2:  log pseudolikelihood = -2027.8662

```

Computing standard errors:

```

Mixed-effects regression          Number of obs      =
407

```

```

-----+-----
Group Variable | No. of      Observations per Group
Groups         Minimum     Average     Maximum
-----+-----

```



|           |  |     |    |      |    |
|-----------|--|-----|----|------|----|
| Studyno   |  | 13  | 10 | 31.3 | 70 |
| newPartID |  | 234 | 1  | 1.7  | 4  |

-----

Wald chi2(3) = 1.17

Log pseudolikelihood = -2027.8662 Prob > chi2 = 0.7608

(Std. Err. adjusted for 13 clusters in Studyno)

-----

| MEPchange Interval] | Coef.    | Robust Std. Err. | z    | P> z  | [95% Conf. Interval] |
|---------------------|----------|------------------|------|-------|----------------------|
| MonoRMT             | .1084704 | .236866          | 0.46 | 0.647 | -.3557785            |
| Age                 | .1210917 | .1127784         | 1.07 | 0.283 | -.0999499            |
| Gender              | 2.468356 | 3.36346          | 0.73 | 0.463 | -4.123904            |
| _cons               | 38.00508 | 16.24395         | 2.34 | 0.019 | 6.167529             |

-----

-----

| Random-effects Parameters | Estimate | Robust Std. Err. | [95% Conf. Interval] |
|---------------------------|----------|------------------|----------------------|
| Studyno: Identity         |          |                  |                      |
| var(_cons)                | 157.0305 | 65.08373         | 69.6932              |
| newPartID: Identity       |          |                  |                      |
| var(_cons)                | 558.6721 | 178.3212         | 298.8574             |
| var(Residual)             | 758.9709 | 212.5291         | 438.3987             |

-----

```
-> mixed MEPchange c.BiRMT Age Gender if Protocol == 0 & Dx==0 ||
Studyno: || newPa
> rtID:,robust
```



```

      var(_cons) |    100.9924    111.1754    11.67511
873.608
-----+-----
----
newPartID: Identity |
      var(_cons) |    1467.58    426.827    829.9287
2595.153
-----+-----
----
      var(Residual) |    206.6208    79.56925    97.13552
439.5113
-----+-----
-----

```

```

-> mixed MEPchange c.MonoAMT Age Gender if Protocol == 0 & Dx==0 ||
Studyno: || new
> PartID:,robust

```

Performing EM optimization:

Performing gradient-based optimization:

```

Iteration 0: log pseudolikelihood = -1294.0376
Iteration 1: log pseudolikelihood = -1294.0375

```

Computing standard errors:

```

Mixed-effects regression                               Number of obs   =
263

```

```

-----+-----
Group Variable |      No. of      Observations per Group
                |      Groups      Minimum   Average   Maximum
-----+-----
      Studyno |           6           20     43.8     70
newPartID |          123           1     2.1     4
-----+-----

```

```

2.46
Log pseudolikelihood = -1294.0375           Wald chi2(3)   =
0.4820                                       Prob > chi2   =

```

(Std. Err. adjusted for 6 clusters in Studyno)

```

-----+-----
MEPchange |      Robust
Interval |      Coef.   Std. Err.   z   P>|z|   [95% Conf.
-----+-----
MonoAMT |  -.490092   .4207196   -1.16  0.244   -1.314687
.3345032

```

```

      Age |   .1233373   .0812742   1.52   0.129   -.0359572
.2826318
      Gender |   3.201804   4.477844   0.72   0.475   -5.574608
11.97822
      _cons |   63.16403   18.60141   3.40   0.001   26.70593
99.62213

```

```

-----
-----
Random-effects Parameters |      Estimate      Robust
Interval]               Std. Err.      [95% Conf.
-----+-----
Studyno: Identity       |
      var(_cons) |      178.3565      101.5413      58.43668
544.3675
-----+-----
newPartID: Identity     |
      var(_cons) |      436.5358      265.2162      132.7011
1436.036
-----+-----
      var(Residual) |      729.7473      306.515      320.3637
1662.271
-----
-----

```

```

-> mixed MEPchange c.BiAMT Age Gender if Protocol == 0 & Dx==0 ||
Studyno: || newPa
> rtID:,robust

```

Performing EM optimization:

Performing gradient-based optimization:

```

Iteration 0:  log pseudolikelihood = -542.54893
Iteration 1:  log pseudolikelihood = -541.89134
Iteration 2:  log pseudolikelihood = -541.85954
Iteration 3:  log pseudolikelihood = -541.85928
Iteration 4:  log pseudolikelihood = -541.85928

```

Computing standard errors:

```

Mixed-effects regression              Number of obs      =
107

```

```

-----
Group Variable |      No. of      Observations per Group
               |      Groups      Minimum      Average      Maximum
-----+-----

```

|           |    |    |      |    |
|-----------|----|----|------|----|
| Studyno   | 6  | 10 | 17.8 | 33 |
| newPartID | 85 | 1  | 1.3  | 3  |

-----

5.17 Wald chi2(3) =

Log pseudolikelihood = -541.85928 Prob > chi2 =

0.1599

(Std. Err. adjusted for 6 clusters in Studyno)

-----

| MEPchange Interval] | Coef.     | Robust Std. Err. | z     | P> z  | [95% Conf. Interval] |
|---------------------|-----------|------------------|-------|-------|----------------------|
| BiAMT               | -.6226971 | .3247755         | -1.92 | 0.055 | -1.259245            |
| .0138512            |           |                  |       |       |                      |
| Age                 | .4843482  | .2664709         | 1.82  | 0.069 | -.0379252            |
| 1.006622            |           |                  |       |       |                      |
| Gender              | 9.836636  | 7.351436         | 1.34  | 0.181 | -4.571914            |
| 24.24519            |           |                  |       |       |                      |
| _cons               | 55.12375  | 12.62634         | 4.37  | 0.000 | 30.37658             |
| 79.87092            |           |                  |       |       |                      |

-----

-----

| Random-effects Parameters Interval] | Estimate | Robust Std. Err. | [95% Conf. Interval] |
|-------------------------------------|----------|------------------|----------------------|
| Studyno: Identity                   |          |                  |                      |
| var(_cons)                          | 1.52e-18 | 6.41e-15         | 0                    |
| .                                   |          |                  |                      |
| newPartID: Identity                 |          |                  |                      |
| var(_cons)                          | 269.623  | 10006.22         | 6.94e-30             |
| 1.05e                               |          |                  |                      |
| var(Residual)                       | 1210.3   | 50865.76         | 2.04e-33             |
| 7.19e                               |          |                  |                      |

-----

\*Step 2 regressions for SICI.

\*This is the starting step 2 model for SICI - all variables that obtained a p-value < 0.10 in stage 1 regressions.

```
. mixed MEPchange Age Gender BaseMEP Hemisphere if  
(Protocol == 0)  
> & Dx==0 || Studyno: || newPartID:,robust
```

Performing EM optimization:

Performing gradient-based optimization:

```
Iteration 0: log pseudolikelihood = -2243.7127  
Iteration 1: log pseudolikelihood = -2243.6731  
Iteration 2: log pseudolikelihood = -2243.6731
```

Computing standard errors:

```
Mixed-effects regression Number of obs =  
456
```

| Group Variable | No. of Groups | Observations per Group Minimum | Average | Maximum |
|----------------|---------------|--------------------------------|---------|---------|
| Studyno        | 15            | 10                             | 30.4    | 70      |
| newPartID      | 283           | 1                              | 1.6     | 4       |

```
Wald chi2(4) =  
20.22  
Log pseudolikelihood = -2243.6731 Prob > chi2 =  
0.0005
```

(Std. Err. adjusted for 15 clusters in Studyno)

| MEPchange | Coef.     | Robust Std. Err. | z     | P> z  | [95% Conf. Interval]  |
|-----------|-----------|------------------|-------|-------|-----------------------|
| Age       | .1107418  | .1146213         | 0.97  | 0.334 | -.1139117<br>.3353954 |
| Gender    | 5.665736  | 3.632083         | 1.56  | 0.119 | -1.453015<br>12.78449 |
| BaseMEP   | -23.28733 | 8.223553         | -2.83 | 0.005 | -39.4052<br>7.169461  |

```

Hemisphere | -4.013009  1.732368  -2.32  0.021  -7.408388  -
.6176303
_cons | 65.08157  13.67916  4.76  0.000  38.27091
91.89222

```

```

-----
-----
Random-effects Parameters | Estimate Robust Std. Err. [95% Conf. Interval]
-----+-----
Studyno: Identity
var(_cons) | 195.8329 85.9892 82.81851
463.0669
-----+-----
newPartID: Identity
var(_cons) | 452.7606 101.2762 292.0564
701.8924
-----+-----
var(Residual) | 676.0384 154.0466 432.5247
1056.652
-----
-----

```

\*Iterating

```

for var Muscle ppTSint MonoRMT BiRMT MonoAMT BiAMT: mixed
MEPchange
> c.X Age Gender BaseMEP Hemisphere if Protocol == 0 ///
> & Dx==0 || Studyno: || newPartID:,robust

```

```

-> mixed MEPchange c.Muscle Age Gender BaseMEP Hemisphere if Protocol ==
0 & Dx==0
> || Studyno: || newPartID:,robust

```

Performing EM optimization:

Performing gradient-based optimization:

```

Iteration 0: log pseudolikelihood = -2243.6699
Iteration 1: log pseudolikelihood = -2243.6302
Iteration 2: log pseudolikelihood = -2243.6301

```

Computing standard errors:





```

              var(_cons) |    452.8735    101.1909    292.269
701.7317
-----+-----

```

```

              var(Residual) |    676.0504    153.9417    432.6674
1056.341
-----+-----

```

```

-> mixed MEPchange c.ppTSint Age Gender BaseMEP Hemisphere if Protocol
== 0 & Dx==0
> || Studyno: || newPartID:,robust

```

Performing EM optimization:

Performing gradient-based optimization:

```

Iteration 0:    log pseudolikelihood = -2176.7583
Iteration 1:    log pseudolikelihood = -2176.7255
Iteration 2:    log pseudolikelihood = -2176.7254

```

Computing standard errors:

```

Mixed-effects regression              Number of obs    =
442

```

```

-----+-----
Group Variable |    No. of      Observations per Group
              |    Groups      Minimum   Average   Maximum
-----+-----
      Studyno |         14         10      31.6      70
    newPartID |        269         1       1.6       4
-----+-----

```

```

              Wald chi2(5)    =
17.30
Log pseudolikelihood = -2176.7254    Prob > chi2    =
0.0040

```

(Std. Err. adjusted for 14 clusters in Studyno)

```

-----+-----
MEPchange |          Robust
Interval] |          Coef.  Std. Err.      z    P>|z|    [95% Conf.
-----+-----
      ppTSint | -8.031322    8.808018   -0.91  0.362   -25.29472
9.232076
      Age |  .0921402   .1233165    0.75  0.455   -.1495558
.3338361
      Gender |  5.559368    3.72985    1.49  0.136   -1.751004
12.86974

```

```

      BaseMEP | -25.74774   9.044947   -2.85   0.004   -43.47551   -
8.019972
      Hemisphere | -4.110605   1.684179   -2.44   0.015   -7.411535   -
.8096746
      _cons |    71.8413   15.80493    4.55   0.000    40.8642
102.8184

```

```

-----
-----
-----
Random-effects Parameters |      Estimate      Robust      [95% Conf.
Interval]
-----+-----
Studyno: Identity |
      var(_cons) |    204.9906    72.52314    102.4682
410.0894
-----+-----
newPartID: Identity |
      var(_cons) |    466.0944    103.4138    301.7277
720.0003
-----+-----
      var(Residual) |    678.809    153.7985    435.4015
1058.291
-----
-----

```

```

-> mixed MEPchange c.MonoRMT Age Gender BaseMEP Hemisphere if Protocol
== 0 & Dx==0
> || Studyno: || newPartID:,robust

```

Performing EM optimization:

Performing gradient-based optimization:

```

Iteration 0:   log pseudolikelihood = -2000.6636
Iteration 1:   log pseudolikelihood = -2000.6426
Iteration 2:   log pseudolikelihood = -2000.6426

```

Computing standard errors:

```

Mixed-effects regression                               Number of obs   =
407

```

```

-----
Group Variable |      No. of      Observations per Group
               |      Groups      Minimum      Average      Maximum
-----+-----
      Studyno |           13           10           31.3           70
newPartID |          234            1            1.7            4

```

-----

28.84 Wald chi2(5) =

Log pseudolikelihood = -2000.6426 Prob > chi2 =

0.0000

(Std. Err. adjusted for 13 clusters in Studyno)

-----

| MEPchange Interval] | Coef.     | Robust Std. Err. | z     | P> z  | [95% Conf. Interval] |
|---------------------|-----------|------------------|-------|-------|----------------------|
| MonoRMT             | -.349762  | .3247811         | -1.08 | 0.282 | -.9863212            |
| .2867972            |           |                  |       |       |                      |
| Age                 | .1424259  | .1185159         | 1.20  | 0.229 | -.089861             |
| .3747128            |           |                  |       |       |                      |
| Gender              | 4.353436  | 4.096342         | 1.06  | 0.288 | -3.675246            |
| 12.38212            |           |                  |       |       |                      |
| BaseMEP             | -29.64184 | 10.55421         | -2.81 | 0.005 | -50.32772            |
| 8.955958            |           |                  |       |       |                      |
| Hemisphere          | -5.605659 | 1.897601         | -2.95 | 0.003 | -9.324888            |
| 1.88643             |           |                  |       |       |                      |
| _cons               | 89.87277  | 28.39005         | 3.17  | 0.002 | 34.2293              |
| 145.5162            |           |                  |       |       |                      |

-----

| Random-effects Parameters Interval] | Estimate | Robust Std. Err. | [95% Conf. Interval] |
|-------------------------------------|----------|------------------|----------------------|
| Studyno: Identity                   |          |                  |                      |
| var(_cons)                          | 282.1264 | 104.4826         | 136.5243             |
| 583.0117                            |          |                  |                      |
| newPartID: Identity                 |          |                  |                      |
| var(_cons)                          | 443.2318 | 111.2133         | 271.0516             |
| 724.786                             |          |                  |                      |
| var(Residual)                       | 673.8053 | 156.6797         | 427.1741             |
| 1062.83                             |          |                  |                      |

-----

```
-> mixed MEPchange c.BiRMT Age Gender BaseMEP Hemisphere if Protocol ==
0 & Dx==0 |
> | Studyno: || newPartID:,robust
```

Performing EM optimization:

Performing gradient-based optimization:

```
Iteration 0: log pseudolikelihood = -397.78284
Iteration 1: log pseudolikelihood = -397.78282 (not concave)
Iteration 2: log pseudolikelihood = -397.78282 (backed up)
```

Computing standard errors:

```
Mixed-effects regression                               Number of obs   =
78
```

```
-----
Group Variable |      No. of      Observations per Group
                |      Groups      Minimum      Average      Maximum
-----+-----
      Studyno |           3          15          26.0          39
    newPartID |          78           1           1.0           1
-----
```

```
Wald chi2(2) =
Log pseudolikelihood = -397.78282      Prob > chi2 =
.
```

(Std. Err. adjusted for 3 clusters in Studyno)

```
-----
MEPchange |      Robust
Interval] |      Coef.   Std. Err.      z    P>|z|    [95% Conf.
-----+-----
      BiRMT |   .2470882   .3100845     0.80   0.426   -.3606662
.8548427
      Age |   .1444077   .1741899     0.83   0.407   -.1969982
.4858136
      Gender |  15.61687   4.818079     3.24   0.001    6.173611
25.06013
      BaseMEP | -18.17106   9.119013    -1.99   0.046   -36.044 -
.2981202
      Hemisphere | -2.415782   2.125187    -1.14   0.256   -6.581073
1.749508
      _cons |   47.3614   36.95123     1.28   0.200   -25.06168
119.7845
-----
```

```

-----
-----
Random-effects Parameters | Estimate      Robust      [95% Conf.
Interval]           Std. Err.
-----+-----
Studyno: Identity      |
var(_cons) | 91.40858    148.2462    3.806362
2195.148
-----+-----
newPartID: Identity   |
var(_cons) | 1315.182    315.9672    821.274
2106.122
-----+-----
var(Residual) | 204.8791    117.1965    66.77083
628.6495
-----
-----

```

```

-> mixed MEPchange c.MonoAMT Age Gender BaseMEP Hemisphere if Protocol
== 0 & Dx==0
> || Studyno: || newPartID:,robust

```

Performing EM optimization:  
Performing gradient-based optimization:

```

Iteration 0: log pseudolikelihood = -1270.5645
Iteration 1: log pseudolikelihood = -1270.5636
Iteration 2: log pseudolikelihood = -1270.5636

```

Computing standard errors:

```

Mixed-effects regression           Number of obs   =
263

```

```

-----
Group Variable | No. of      Observations per Group
Groups         Minimum     Average     Maximum
-----+-----
Studyno | 6          20         43.8       70
newPartID | 123        1          2.1        4
-----

```

```

Wald chi2(5) =
429.73
Log pseudolikelihood = -1270.5636   Prob > chi2 =
0.0000

```

(Std. Err. adjusted for 6 clusters in Studyno)

```

-----
-----
MEPchange |           Coef.      Robust
Interval] |           Std. Err.      z    P>|z|      [95% Conf.
-----+-----
MonoAMT |  -.9197529   .7011269   -1.31   0.190   -2.293936
.4544306
Age |    .192005   .1362812    1.41   0.159   -.0751012
.4591112
Gender |    7.086305   7.54868    0.94   0.348   -7.708835
21.88145
BaseMEP |  -37.90118  18.88504   -2.01   0.045  -74.91517  -
.8871883
Hemisphere |  -5.014506   1.640793   -3.06   0.002  -8.230402  -
1.79861
_cons |   113.7038   45.2527    2.51   0.012   25.01012
202.3975
-----
-----

```

```

-----
-----
Random-effects Parameters |           Estimate      Robust
Interval] |           Std. Err.      [95% Conf.
-----+-----
Studyno: Identity
var(_cons) |   294.2187   150.6621   107.8428
802.6928
-----+-----
newPartID: Identity
var(_cons) |   333.4856   126.739   158.3374
702.3777
-----+-----
var(Residual) |   617.1795   188.3234   339.3748
1122.389
-----
-----

```

```

-> mixed MEPchange c.BiAMT Age Gender BaseMEP Hemisphere if Protocol ==
0 & Dx==0 |
> | Studyno: || newPartID:,robust

```

Performing EM optimization:

Performing gradient-based optimization:

```

Iteration 0:   log pseudolikelihood = -537.39432
Iteration 1:   log pseudolikelihood = -536.72862

```



```

                var(_cons) |    108.7552    283.307    .6592848
17940.2
-----+-----
----
newPartID: Identity |
                var(_cons) |    144.245    103.915    35.14713
591.9862
-----+-----
----
                var(Residual) |    1129.344    163.3617    850.5473
1499.527
-----
-----

```

. \*This is the final model

```

. mixed MEPchange Age i.Gender BaseMEP i.Hemisphere if (Protocol == 0) &
Dx==0 || Studyno: || newPartID:,robust

```

Performing EM optimization:

Performing gradient-based optimization:

```

Iteration 0:   log pseudolikelihood = -2243.7127
Iteration 1:   log pseudolikelihood = -2243.6731
Iteration 2:   log pseudolikelihood = -2243.6731

```

Computing standard errors:

```

Mixed-effects regression                               Number of obs   =
456

```

```

-----+-----
Group Variable |      No. of      Observations per Group
                |      Groups      Minimum   Average   Maximum
-----+-----
      Studyno |           15           10    30.4     70
    newPartID |           283            1     1.6      4
-----+-----

```

```

                Wald chi2(4)   =
20.22
Log pseudolikelihood = -2243.6731   Prob > chi2   =
0.0005

```

(Std. Err. adjusted for 15 clusters in Studyno)



```

-----
-----
MEPchange |           Coef.      Robust
Interval] |           Std. Err.      z      P>|z|      [95% Conf.
-----+-----
Age |      .1107418      .1146213      0.97      0.334      -.1139117
.3353954
Gender |
Female |      5.665736      3.632083      1.56      0.119      -1.453015
12.78449
BaseMEP |     -23.28733      8.223553      -2.83      0.005      -39.4052  -
7.169461
Hemisphere |
R |     -4.013009      1.732368      -2.32      0.021      -7.408388  -
.6176303
_cons |      65.08157      13.67916      4.76      0.000      38.27091
91.89222
-----
-----

```

\*Step 1 regressions for ICF. Examining the variance in ICF explained by each IV separately, while controlling for the age and gender of participants.

\*IVs omitted because not enough studies: Machine\_ppulse ppCSint ppPulseType ISI

```

.
.
. for var      BaseMEP Muscle Hemisphere  ppTSint Neuronavigation
MonoRMT MonoAMT : mixed MEPchange      ///
>      c.X Age Gender if      Protocol ==      1 &      Dx==0
|| Studyno: || newPartID:,robust noretale

```

```
-> mixed MEPchange c.BaseMEP Age Gender if Protocol == 1 & Dx==0 ||
Studyno: || new
> PartID:,robust norettable
```

Performing EM optimization:

Performing gradient-based optimization:

```
Iteration 0: log pseudolikelihood = -2294.6159
Iteration 1: log pseudolikelihood = -2294.5463
Iteration 2: log pseudolikelihood = -2294.5463
```

Computing standard errors:

```
Mixed-effects regression          Number of obs    =
393
```

| Group Variable | No. of Groups | Observations per Group |         |         |
|----------------|---------------|------------------------|---------|---------|
|                |               | Minimum                | Average | Maximum |
| Studyno        | 14            | 10                     | 28.1    | 70      |
| newPartID      | 256           | 1                      | 1.5     | 3       |

```
Wald chi2(3) =
6.41
Log pseudolikelihood = -2294.5463    Prob > chi2 =
0.0931
```

(Std. Err. adjusted for 14 clusters in

Studyno)

| MEPchange | Coef.     | Robust Std. Err. | z     | P> z  | [95% Conf. Interval] |
|-----------|-----------|------------------|-------|-------|----------------------|
| BaseMEP   | -71.83875 | 28.90853         | -2.49 | 0.013 | -128.4984 - 15.17908 |
| Age       | -.0014924 | .4610102         | -0.00 | 0.997 | -.9050559 .9020711   |
| Gender    | -4.805832 | 8.276008         | -0.58 | 0.561 | -21.02651 11.41485   |
| _cons     | 227.2174  | 38.17283         | 5.95  | 0.000 | 152.4 302.0347       |

```
-> mixed MEPchange c.Muscle Age Gender if Protocol == 1 & Dx==0 ||
Studyno: || newP
```

> artID:,robust noretale

Performing EM optimization:

Performing gradient-based optimization:

Iteration 0: log pseudolikelihood = -2327.4999  
Iteration 1: log pseudolikelihood = -2327.4307  
Iteration 2: log pseudolikelihood = -2327.4307

Computing standard errors:

Mixed-effects regression Number of obs =  
393

| Group Variable | No. of Groups | Observations per Group |         |         |
|----------------|---------------|------------------------|---------|---------|
|                |               | Minimum                | Average | Maximum |
| Studyno        | 14            | 10                     | 28.1    | 70      |
| newPartID      | 256           | 1                      | 1.5     | 3       |

10.30 Wald chi2(3) =  
Log pseudolikelihood = -2327.4307 Prob > chi2 =  
0.0162

(Std. Err. adjusted for 14 clusters in

Studyno)

|        | MEPchange | Coef.    | Robust Std. Err. | z     | P> z      | [95% Conf. Interval] |
|--------|-----------|----------|------------------|-------|-----------|----------------------|
| Muscle | 1.376667  | 28.52563 | 0.05             | 0.962 | -54.53254 | 57.28588             |
| Age    | .5851793  | .3642238 | 1.61             | 0.108 | -.1286862 | 1.299045             |
| Gender | -12.14622 | 8.690536 | -1.40            | 0.162 | -29.17936 | 4.886914             |
| _cons  | 146.1589  | 17.15735 | 8.52             | 0.000 | 112.5312  | 179.7867             |

-> mixed MEPchange c.Hemisphere Age Gender if Protocol == 1 & Dx==0 ||  
Studyno: ||  
> newPartID:,robust noretale

Performing EM optimization:



Iteration 2: log pseudolikelihood = -2245.3709

Computing standard errors:

Mixed-effects regression Number of obs = 379

| Group Variable | No. of Groups | Observations per Group |         |         |
|----------------|---------------|------------------------|---------|---------|
|                |               | Minimum                | Average | Maximum |
| Studyno        | 13            | 10                     | 29.2    | 70      |
| newPartID      | 242           | 1                      | 1.6     | 3       |

Wald chi2(3) = 7.33  
 Log pseudolikelihood = -2245.3709 Prob > chi2 = 0.0621

(Std. Err. adjusted for 13 clusters in Studyno)

|         | Coef.     | Robust Std. Err. | z     | P> z  | [95% Conf. Interval] |
|---------|-----------|------------------|-------|-------|----------------------|
| ppTSint | -31.27347 | 20.60984         | -1.52 | 0.129 | -71.66801            |
| Age     | .4298185  | .34591           | 1.24  | 0.214 | -.2481526            |
| Gender  | -12.51507 | 8.949082         | -1.40 | 0.162 | -30.05495            |
| _cons   | 165.8492  | 17.05441         | 9.72  | 0.000 | 132.4231             |

```
-> mixed MEPchange c.Neuronavigation Age Gender if Protocol == 1 & Dx==0
|| Studyno
> : || newPartID:,robust noretale
```

Performing EM optimization:

Performing gradient-based optimization:

Iteration 0: log pseudolikelihood = -2326.7597  
 Iteration 1: log pseudolikelihood = -2326.6911  
 Iteration 2: log pseudolikelihood = -2326.6911

Computing standard errors:



| Group Variable | No. of Groups | Observations per Group |         |         |
|----------------|---------------|------------------------|---------|---------|
|                |               | Minimum                | Average | Maximum |
| Studyno        | 12            | 10                     | 28.7    | 70      |
| newPartID      | 207           | 1                      | 1.7     | 3       |

57.35  
 Log pseudolikelihood = -2014.7426  
 0.0000

Wald chi2(3) =  
 Prob > chi2 =

(Std. Err. adjusted for 12 clusters in Studyno)

| MEPchange Interval] | Coef.     | Robust Std. Err. | z     | P> z  | [95% Conf. Interval] |
|---------------------|-----------|------------------|-------|-------|----------------------|
| MonoRMT             | 2.963653  | .6799572         | 4.36  | 0.000 | 1.630962             |
| Age                 | .5288319  | .5960899         | 0.89  | 0.375 | -.6394829            |
| Gender              | -16.31275 | 7.716366         | -2.11 | 0.035 | -31.43655            |
| _cons               | -1.168291 | 22.69199         | -0.05 | 0.959 | -45.64378            |

```
-> mixed MEPchange c.MonoAMT Age Gender if Protocol == 1 & Dx==0 ||
Studyno: || new
> PartID:,robust noretale
```

Performing EM optimization:

Performing gradient-based optimization:

```
Iteration 0: log pseudolikelihood = -1008.8916
Iteration 1: log pseudolikelihood = -1008.7753
Iteration 2: log pseudolikelihood = -1008.7717
Iteration 3: log pseudolikelihood = -1008.7717
```

Computing standard errors:

Mixed-effects regression  
 168

Number of obs =

| Group Variable | No. of Groups | Observations per Group |         |         |
|----------------|---------------|------------------------|---------|---------|
|                |               | Minimum                | Average | Maximum |

|           |  |    |    |      |    |
|-----------|--|----|----|------|----|
| Studyno   |  | 4  | 20 | 42.0 | 70 |
| newPartID |  | 84 | 2  | 2.0  | 2  |

-----

Wald chi2(3) = 241480.47

Log pseudolikelihood = -1008.7717 Prob > chi2 = 0.0000

(Std. Err. adjusted for 4 clusters in Studyno)

-----

| MEPchange Interval] | Coef.     | Robust Std. Err. | z     | P> z  | [95% Conf. Interval] |
|---------------------|-----------|------------------|-------|-------|----------------------|
| MonoAMT             | 2.951797  | .5354576         | 5.51  | 0.000 | 1.90232              |
| Age                 | .6873275  | .61033           | 1.13  | 0.260 | -.5088973            |
| Gender              | -26.80652 | 6.322692         | -4.24 | 0.000 | -39.19877 -          |
| _cons               | 42.1005   | 11.17352         | 3.77  | 0.000 | 20.20081             |

-----

```

. .
. * Doing this separately here bc have to take out the newPartID
. mixed MEPchange c.BiAMT c.Age i.Gender if (Protocol ==
1) & Dx==0
> || Studyno: ,robust

```

Performing EM optimization:

Performing gradient-based optimization:

Iteration 0: log pseudolikelihood = -442.40142  
Iteration 1: log pseudolikelihood = -442.3021  
Iteration 2: log pseudolikelihood = -442.3021

Computing standard errors:

Mixed-effects regression Number of obs = 75  
Group variable: Studyno Number of groups = 5  
Obs per group: min = 10



```

15.0
25
8.07
Log pseudolikelihood = -442.3021
0.0446
                                Wald chi2(3) =
                                Prob > chi2 =
                                avg =
                                max =

```

(Std. Err. adjusted for 5 clusters in Studyno)

```

-----
-----
      MEPchange |           Coef.   Robust
      Interval] |           Std. Err.   z   P>|z|   [95% Conf.
-----+-----
-----
      BiAMT |    3.663754   2.684226   1.36   0.172   -1.597232
8.92474
      Age |   -.0134243   1.033459   -0.01   0.990   -2.038967
2.012118
      Gender |
      Female |  -18.24444   35.65254   -0.51   0.609   -88.12214
51.63325
      _cons |    44.28037   74.17977    0.60   0.551   -101.1093
189.67
-----
-----

```

```

-----
-----
      Random-effects Parameters |           Estimate   Robust
      Interval] |           Std. Err.   Std. Err.   [95% Conf.
-----+-----
-----
Studyno: Identity |
      var(_cons) |    8.70e-15   2.29e-12   3.6e-239
2.1e□
-----+-----
-----
      var(Residual) |    7760.838   2052.043   4622.133
13030.91
-----
-----

```

```

. mixed MEPchange c.BiRMT c.Age i.Gender if (Protocol ==
1) & Dx==0
> || Studyno: ,robust

```

Performing EM optimization:





(Std. Err. adjusted for 14 clusters in

Studyno)

```

-----
-----
      MEPchange |           Robust
      Interval] |      Coef.   Std. Err.      z    P>|z|    [95% Conf.
-----+-----
      BaseMEP |   -71.8332   28.93723   -2.48  0.013   -128.5491  -
15.11728
      Gender |
      Female |   -4.802347   8.188739   -0.59  0.558   -20.85198
11.24729
      _cons |    227.1622   34.26389    6.63  0.000    160.0062
294.3182
-----
-----

```

```

-----
-----
      Random-effects Parameters |           Robust
      Interval] |      Estimate   Std. Err.    [95% Conf.
-----+-----
Studyno: Identity |
      var(_cons) |    859.9823   387.4785    355.6045
2079.753
-----+-----
newPartID: Identity |
      var(_cons) |   3415.069   947.5544    1982.544
5882.693
-----+-----
      var(Residual) |    3837.627  1319.951    1955.655
7530.665
-----
-----

```

\*Iterating

```

.
. for var      Age  ppTSint Muscle Hemisphere: mixed MEPchange ///
>             c.X BaseMEP Gender if Protocol ==    1 &    Dx==0
|| Studyno: || newPartID:,robust norettable

```

```
-> mixed MEPchange c.Age BaseMEP Gender if Protocol == 1 & Dx==0 ||
Studyno: || new
> PartID:,robust norettable
```

Performing EM optimization:

Performing gradient-based optimization:

```
Iteration 0: log pseudolikelihood = -2294.6159
Iteration 1: log pseudolikelihood = -2294.5463
Iteration 2: log pseudolikelihood = -2294.5463
```

Computing standard errors:

```
Mixed-effects regression          Number of obs    =
393
```

```
-----
```

| Group Variable | No. of Groups | Observations per Group |         |         |
|----------------|---------------|------------------------|---------|---------|
|                |               | Minimum                | Average | Maximum |
| Studyno        | 14            | 10                     | 28.1    | 70      |
| newPartID      | 256           | 1                      | 1.5     | 3       |

```
-----
```

```
6.41                                Wald chi2(3)      =
Log pseudolikelihood = -2294.5463    Prob > chi2      =
0.0931
```

(Std. Err. adjusted for 14 clusters in

Studyno)

```
-----
```

|  | MEPchange | Coef.     | Robust Std. Err. | z     | P> z  | [95% Conf. Interval] |
|--|-----------|-----------|------------------|-------|-------|----------------------|
|  | Age       | -.0014924 | .4610102         | -0.00 | 0.997 | -.9050559            |
|  | BaseMEP   | -71.83875 | 28.90852         | -2.49 | 0.013 | -128.4984            |
|  | Gender    | -4.805832 | 8.276008         | -0.58 | 0.561 | -21.02651            |
|  | _cons     | 227.2174  | 38.17283         | 5.95  | 0.000 | 152.4                |

```
-----
```

```
-> mixed MEPchange c.ppTSint BaseMEP Gender if Protocol == 1 & Dx==0 ||
Studyno: ||
> newPartID:,robust norettable
```



```

Iteration 0: log pseudolikelihood = -2294.5445
Iteration 1: log pseudolikelihood = -2294.4752
Iteration 2: log pseudolikelihood = -2294.4752

```

Computing standard errors:

```

Mixed-effects regression          Number of obs    =
393

```

```

-----
Group Variable |      No. of      Observations per Group
                |      Groups      Minimum      Average      Maximum
-----+-----
      Studyno |           14          10          28.1          70
    newPartID |          256           1           1.5           3
-----

```

```

                                Wald chi2(3)    =
11.74
Log pseudolikelihood = -2294.4752          Prob > chi2    =
0.0083

```

(Std. Err. adjusted for 14 clusters in Studyno)

```

-----
MEPchange |      Coef.      Robust      z      P>|z|      [95% Conf.
Interval]
-----+-----
Muscle | -7.852723      23.7672      -0.33      0.741      -54.43558
38.73013
BaseMEP | -71.99152      28.69792      -2.51      0.012      -128.2384 -
15.74464
Gender | -5.000234      8.025518      -0.62      0.533      -20.72996
10.72949
      _cons |      229.7268      30.53341      7.52      0.000      169.8824
289.5712
-----

```

```

-> mixed MEPchange c.Hemisphere BaseMEP Gender if Protocol == 1 & Dx==0
|| Studyno:
> || newPartID:,robust norettable

```

Performing EM optimization:

Performing gradient-based optimization:

```

Iteration 0: log pseudolikelihood = -2294.5567
Iteration 1: log pseudolikelihood = -2294.4875
Iteration 2: log pseudolikelihood = -2294.4875

```





```
> : || newPartID:,robust noretale
```

```
Performing EM optimization:
```

```
Performing gradient-based optimization:
```

```
Iteration 0: log pseudolikelihood = -2209.5674  
Iteration 1: log pseudolikelihood = -2209.5174  
Iteration 2: log pseudolikelihood = -2209.5174
```

```
Computing standard errors:
```

```
Mixed-effects regression Number of obs =  
379
```

```
-----  
Group Variable | No. of Observations per Group  
                | Groups Minimum Average Maximum  
-----+-----  
    Studyno |      13      10      29.2      70  
    newPartID |     242       1       1.6       3  
-----
```

```
Wald chi2(4) =  
8.01  
Log pseudolikelihood = -2209.5174 Prob > chi2 =  
0.0914
```

```
(Std. Err. adjusted for 13 clusters in  
Studyno)
```

```
-----  
MEPchange | Robust  
Interval] | Coef. Std. Err. z P>|z| [95% Conf.  
-----+-----  
Age | -.1797049 .4539419 -0.40 0.692 -1.069415  
.7100049  
BaseMEP | -81.56248 32.36383 -2.52 0.012 -144.9944 -  
18.13054  
Gender | -4.877201 8.339107 -0.58 0.559 -21.22155  
11.46715  
ppTSint | -34.70664 16.96814 -2.05 0.041 -67.96358 -  
1.44971  
_cons | 252.5945 41.95015 6.02 0.000 170.3737  
334.8153  
-----
```

```
-> mixed MEPchange c.Muscle BaseMEP Gender ppTSint if Protocol == 1 &  
Dx==0 || Stud  
> yno: || newPartID:,robust noretale
```





```
. mixed MEPchange c.BaseMEP i.ppTSint i.Gender if
(Protocol == 1) &
> Dx==0 || Studyno: || newPartID:,robust
```

Performing EM optimization:

Performing gradient-based optimization:

```
Iteration 0: log pseudolikelihood = -2209.6579
Iteration 1: log pseudolikelihood = -2209.607
Iteration 2: log pseudolikelihood = -2209.607
```

Computing standard errors:

```
Mixed-effects regression Number of obs =
379
```

```
-----
```

| Group Variable | No. of Groups | Observations per Group |         |         |
|----------------|---------------|------------------------|---------|---------|
|                |               | Minimum                | Average | Maximum |
| Studyno        | 13            | 10                     | 29.2    | 70      |
| newPartID      | 242           | 1                      | 1.6     | 3       |

```
-----
```

```
7.46 Wald chi2(3) =
Log pseudolikelihood = -2209.607 Prob > chi2 =
0.0586
```

(Std. Err. adjusted for 13 clusters in Studyno)

```
-----
```

|           | MEPchange | Coef.    | Robust Std. Err. | z     | P> z        | [95% Conf. Interval] |
|-----------|-----------|----------|------------------|-------|-------------|----------------------|
| BaseMEP   | -80.82001 | 32.65889 | -2.47            | 0.013 | -144.8303 - |                      |
| ppTSint   |           |          |                  |       |             |                      |
| 0.5-1.5MV | -33.31513 | 16.43076 | -2.03            | 0.043 | -65.51884 - |                      |
| Gender    |           |          |                  |       |             |                      |
| Female    | -4.461701 | 8.240202 | -0.54            | 0.588 | -20.6122    |                      |
| _cons     | 245.4519  | 38.38918 | 6.39             | 0.000 | 170.2105    |                      |

```
-----
```

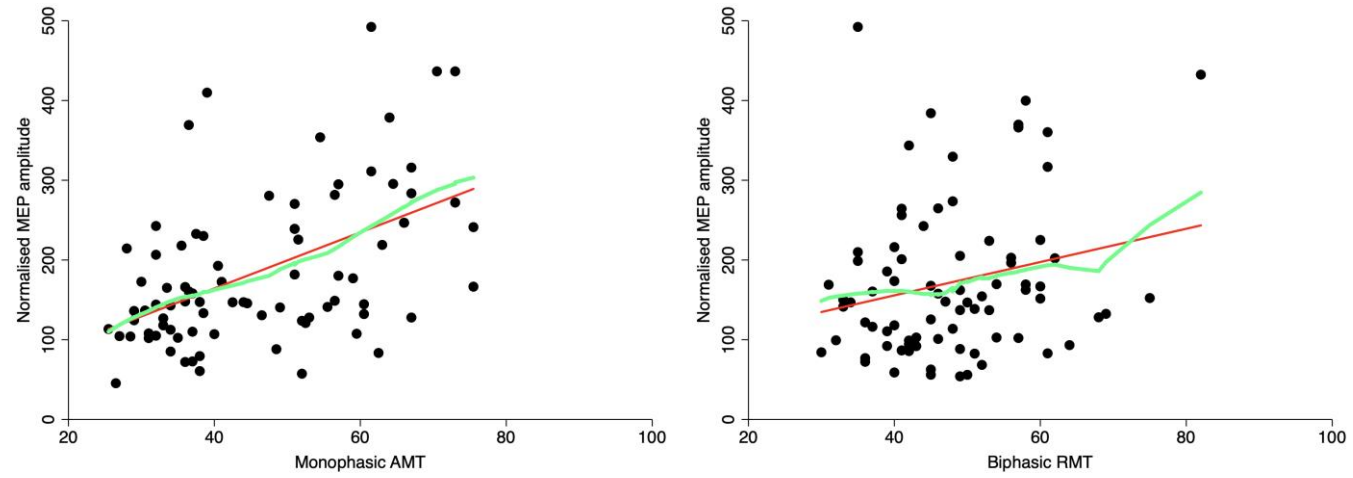

**Supplementary file 9. Non-linear relationships for ICF.** Post-hoc analyses demonstrated significant non-linear relationships between ICF normalised MEP and monophasic AMT and biphase RMT.

\*Step 1 regressions for Monophasic RMT. Examining the variance in Monophasic RMT explained by each IV separately, while controlling for the age and gender of participants.

Abbreviations:

MEP change = Normalised MEP (DV)  
 Age  
 Gender  
 BaseMEP = Baseline MEP amplitude  
 Machine\_MonoRMT = TMS machine  
 Muscle = Target muscle  
 Hemisphere = M1 hemisphere  
 ppCSint = paired pulse conditioning stimulus intensity  
 ppTSint = paired pulse test stimulus intensity  
 PulseType/PulseType2 = Pulse waveform  
 ISI = interstimulus interval  
 MonoRMT = Monophasic RMT  
 MonoAMT = Monophasic AMT  
 BiRMT = Biphasic RMT  
 BiAMT = Biphasic AMT  
 Mono\_cmb = Monophasic MT combined  
 Bi\_cmb = Biphasic MT combined  
 RMTcmb = RMT combined  
 AMTcmb = AMT combined  
 MTcmb = MT combined  
 TSint\_comparison = denotes the analysis of 120% RMT data  
 Studyno = Study ID  
 newPartID = Participant ID

\*IVs omitted because of insufficient data (did not include at least three studies within each IV level):

Machine\_MonoRMT

```
. for var Muscle Hemisphere Neuronavigation: mixed MonoRMT c.X Age
Gender || Stud
> yno: || newPartID:,robust noretale
```

```
-> mixed MonoRMT c.Muscle Age Gender || Studyno: || newPartID:,robust
noretale
```

Performing EM optimization:

Performing gradient-based optimization:

```
Iteration 0: log pseudolikelihood = -2158.0198
Iteration 1: log pseudolikelihood = -2157.8946
Iteration 2: log pseudolikelihood = -2157.8946
```



| Group Variable | No. of Groups | Observations per Group |         |         |
|----------------|---------------|------------------------|---------|---------|
|                |               | Minimum                | Average | Maximum |
| Studyno        | 26            | 9                      | 23.2    | 70      |
| newPartID      | 516           | 1                      | 1.2     | 2       |

15.87  
 Log pseudolikelihood = -2152.824  
 0.0012

Wald chi2(3) =  
 Prob > chi2 =

(Std. Err. adjusted for 26 clusters in Studyno)

|            | Coef.     | Robust Std. Err. | z     | P> z  | [95% Conf. Interval] |
|------------|-----------|------------------|-------|-------|----------------------|
| Hemisphere | -2.167551 | .8941427         | -2.42 | 0.015 | -3.920038 - .4150636 |
| Age        | .0877955  | .0250402         | 3.51  | 0.000 | .0387177 .1368733    |
| Gender     | .8295988  | .8551474         | 0.97  | 0.332 | -.8464594 2.505657   |
| _cons      | 43.8205   | 2.032247         | 21.56 | 0.000 | 39.83737 47.80363    |

```
-> mixed MonoRMT c.Neuronavigation Age Gender || Studyno: ||
newPartID:,robust nore
> table
```

Performing EM optimization:

Performing gradient-based optimization:

```
Iteration 0: log pseudolikelihood = -2157.1211
Iteration 1: log pseudolikelihood = -2156.9948
Iteration 2: log pseudolikelihood = -2156.9948
```

Computing standard errors:

Mixed-effects regression  
 603

Number of obs =

| Group Variable | No. of Groups | Observations per Group |         |         |
|----------------|---------------|------------------------|---------|---------|
|                |               | Minimum                | Average | Maximum |



|           |  |     |   |      |    |
|-----------|--|-----|---|------|----|
| Studyno   |  | 26  | 9 | 23.2 | 70 |
| newPartID |  | 516 | 1 | 1.2  | 2  |

-----

Wald chi2(3) = 13.06  
 Prob > chi2 = 0.0045

(Std. Err. adjusted for 26 clusters in Studyno)

|                 | Coef.     | Robust Std. Err. | z     | P> z  | [95% Conf. Interval]  |
|-----------------|-----------|------------------|-------|-------|-----------------------|
| Neuronavigation | -5.554583 | 5.132827         | -1.08 | 0.279 | -15.61474<br>4.505573 |
| Age             | .0876297  | .0243342         | 3.60  | 0.000 | .0399355<br>.1353238  |
| Gender          | .8071669  | .851408          | 0.95  | 0.343 | -.8615621<br>2.475896 |
| _cons           | 47.73867  | 4.603463         | 10.37 | 0.000 | 38.71605<br>56.7613   |

\*Step 2 regressions for Monophasic RMT.

\*This is the starting step 2 model for Monophasic RMT - all variables that obtained a p-value < 0.10 in stage 1 regressions.

```
. for var Gender Neuronavigation Muscle : mixed MonoRMT c.X Age
Hemisphere || Stu
> dyno: || newPartID:,robust
```

```
-> mixed MonoRMT c.Gender Age Hemisphere || Studyno: ||
newPartID:,robust
```

Performing EM optimization:

Performing gradient-based optimization:

```
Iteration 0: log pseudolikelihood = -2152.894
Iteration 1: log pseudolikelihood = -2152.824
Iteration 2: log pseudolikelihood = -2152.824
```



```
-----+-----
-----
var(Residual) | 19.07504 7.344056 8.969026
40.56817
-----
```

```
-> mixed MonoRMT c.Neuronavigation Age Hemisphere || Studyno: ||
newPartID:,robust
```

Performing EM optimization:

Performing gradient-based optimization:

```
Iteration 0: log pseudolikelihood = -2175.4234
Iteration 1: log pseudolikelihood = -2175.3661
Iteration 2: log pseudolikelihood = -2175.3661
```

Computing standard errors:

```
Mixed-effects regression          Number of obs    =
605
```

```
-----+-----
Group Variable | No. of      Observations per Group
                | Groups      Minimum   Average   Maximum
-----+-----
Studyno | 26          9        23.3     70
newPartID | 518         1        1.2      2
-----
```

```
13.89                                Wald chi2(3)    =
Log pseudolikelihood = -2175.3661    Prob > chi2    =
0.0031
```

(Std. Err. adjusted for 26 clusters in Studyno)

```
-----+-----
MonoRMT | Robust
Interval] Coef. Std. Err. z P>|z| [95% Conf.
-----+-----
Neuronavigation | -4.980313 5.229877 -0.95 0.341 -15.23068
5.270059
Age | .082273 .023767 3.46 0.001 .0356905
.1288556
Hemisphere | -2.141702 .9041601 -2.37 0.018 -3.913823 -
.3695807
_cons | 48.37788 4.655561 10.39 0.000 39.25315
57.50261
```



(Std. Err. adjusted for 26 clusters in Studyno)

```
-----
-----
      MonoRMT |           Coef.      Robust
Interval]    |           Std. Err.      z    P>|z|    [95% Conf.
-----+-----
-----
      Muscle |  -.3326077    4.704501    -0.07    0.944    -9.553259
8.888044
      Age |    .083011    .0246176     3.37    0.001     .0347614
.1312606
      Hemisphere | -2.172428    .8909239    -2.44    0.015    -3.918607  -
.4262489
      _cons |   44.61384    2.055979    21.70    0.000     40.5842
48.64349
-----
-----
```

```
-----
-----
      Random-effects Parameters |           Estimate      Robust
Interval]    |           Std. Err.      [95% Conf.
-----+-----
-----
Studyno: Identity |
      var(_cons) |   80.05252    17.88173    51.66993
124.0258
-----+-----
-----
newPartID: Identity |
      var(_cons) |   57.87658    14.14898    35.84357
93.45327
-----+-----
-----
      var(Residual) |   19.22974     7.514983     8.93972
41.36405
-----
-----
```

```
.
. *Final model
. mixed MonoRMT Age i.Hemisphere || Studyno: || newPartID:,robust
```

```
Performing EM optimization:
Performing gradient-based optimization:
```



```

newPartID: Identity |
                var(_cons) | 57.87702 14.14931 35.84357
93.4547
-----+-----
-----
                var(Residual) | 19.22993 7.515469 8.93943
41.36619
-----
-----

```

\*Step 1 regressions for Monophasic AMT. Examining the variance in Monophasic AMT explained by each IV separately, while controlling for the age and gender of participants.

\*IVs omitted because of insufficient data (did not include at least three studies within each IV level):

Machine\_MonoAMT Neuronavigation Muscle

```

. for var Hemisphere: mixed MonoAMT c.X Age Gender || Studyno: ||
newPartID:,robus
> t

```

```

-> mixed MonoAMT c.Hemisphere Age Gender || Studyno: ||
newPartID:,robust

```

Performing EM optimization:

Performing gradient-based optimization:

```

Iteration 0: log pseudolikelihood = -643.86716
Iteration 1: log pseudolikelihood = -643.86501
Iteration 2: log pseudolikelihood = -643.86501

```

Computing standard errors:

```

Mixed-effects regression                               Number of obs   =
185

```

```

-----+-----
Group Variable |      No. of      Observations per Group
              |      Groups      Minimum      Average      Maximum
-----+-----
      Studyno |           6           11           30.8           70
newPartID |          123           1            1.5            2
-----

```

16.56  
 Log pseudolikelihood = -643.86501  
 0.0009

Wald chi2(3) =  
 Prob > chi2 =

(Std. Err. adjusted for 6 clusters in Studyno)

```
-----
```

|  |            | Robust    |           |       |            |           |
|--|------------|-----------|-----------|-------|------------|-----------|
|  | MonoAMT    | Coef.     | Std. Err. | z     | P> z       |           |
|  | Interval]  |           |           |       | [95% Conf. |           |
|  | Hemisphere | -2.044264 | 1.406067  | -1.45 | 0.146      | -4.800104 |
|  | .7115761   |           |           |       |            |           |
|  | Age        | .0881807  | .0461307  | 1.91  | 0.056      | -.0022337 |
|  | .1785952   |           |           |       |            |           |
|  | Gender     | .1843289  | 1.909437  | 0.10  | 0.923      | -3.558099 |
|  | 3.926756   |           |           |       |            |           |
|  | _cons      | 40.02314  | 4.788737  | 8.36  | 0.000      | 30.63739  |
|  | 49.40889   |           |           |       |            |           |

```
-----
```

\*Step 2 regressions for Monophasic AMT.

```
. for var Hemisphere Gender: mixed MonoAMT c.X Age || Studyno: ||
newPartID:,robust
```

```
-> mixed MonoAMT c.Hemisphere Age || Studyno: || newPartID:,robust
```

Performing EM optimization:

Performing gradient-based optimization:

```
Iteration 0: log pseudolikelihood = -643.87551
Iteration 1: log pseudolikelihood = -643.87335
Iteration 2: log pseudolikelihood = -643.87335
```

Computing standard errors:

Mixed-effects regression  
 185

Number of obs =

```
-----
```

| Group Variable | No. of Groups | Observations per Group |         |         |
|----------------|---------------|------------------------|---------|---------|
|                |               | Minimum                | Average | Maximum |
|                |               |                        |         |         |

```
-----
```



|           |     |    |      |    |
|-----------|-----|----|------|----|
| Studyno   | 6   | 11 | 30.8 | 70 |
| newPartID | 123 | 1  | 1.5  | 2  |

-----

Wald chi2(2) = 3.75

Log pseudolikelihood = -643.87335 Prob > chi2 = 0.1536

(Std. Err. adjusted for 6 clusters in Studyno)

-----

|            | Coef.     | Robust Std. Err. | z     | P> z  | [95% Conf. Interval]  |
|------------|-----------|------------------|-------|-------|-----------------------|
| Hemisphere | -2.043988 | 1.408105         | -1.45 | 0.147 | -4.803822<br>.7158467 |
| Age        | .0876773  | .0500413         | 1.75  | 0.080 | -.0104019<br>.1857565 |
| _cons      | 40.12775  | 4.312104         | 9.31  | 0.000 | 31.67618<br>48.57931  |

-----

-----

| Random-effects Parameters | Estimate | Robust Std. Err. | [95% Conf. Interval] |
|---------------------------|----------|------------------|----------------------|
| Studyno: Identity         |          |                  |                      |
| var(_cons)                | 76.12289 | 49.24335         | 21.42294<br>270.4901 |
| newPartID: Identity       |          |                  |                      |
| var(_cons)                | 38.35551 | 4.93975          | 29.79908<br>49.36883 |
| var(Residual)             | 26.01736 | 11.17431         | 11.21185<br>60.37393 |

-----

-> mixed MonoAMT c.Gender Age || Studyno: || newPartID:,robust

Performing EM optimization:

Performing gradient-based optimization:



```

                    var(_cons) |   36.97731   6.037561   26.85056
50.9234
-----+-----
                    var(Residual) |   28.04595   13.90795   10.6111
74.12759
-----

```

. \*None became p<0.10

. \*Final model

. mixed MonoAMT Age || Studyno: || newPartID:,robust

Performing EM optimization:

Performing gradient-based optimization:

```

Iteration 0:   log pseudolikelihood = -646.29055
Iteration 1:   log pseudolikelihood = -646.28708
Iteration 2:   log pseudolikelihood = -646.28708

```

Computing standard errors:

```

Mixed-effects regression                               Number of obs   =
185

```

```

-----
Group Variable |      No. of      Observations per Group
                |      Groups      Minimum   Average   Maximum
-----+-----
      Studyno |           6           11     30.8     70
newPartID |          123           1      1.5      2
-----

```

```

Wald chi2(1) =
3.08
Log pseudolikelihood = -646.28708      Prob > chi2 =
0.0792

```

(Std. Err. adjusted for 6 clusters in Studyno)

```

-----
MonoAMT |      Coef.      Robust      z      P>|z|      [95% Conf.
Interval] |      Std. Err.
-----+-----

```





```

          var(_cons) | 12.53973 6.461749 4.567327
34.42818
-----+-----
----
newPartID: Identity |
          var(_cons) | 33.78715 4.451385 26.09802
43.74169
-----+-----
----
          var(Residual) | 40.24614 1.19274 37.97501
42.65309
-----
-----

```

. contrast Machine

Contrasts of marginal linear predictions

Margins : asbalanced

```

-----
|          df          chi2      P>chi2
-----+-----
BiRMT |
Machine_BiRMT |          2          26.97      0.0000
-----

```

. mixed BiRMT c.Age i.Gender i.Neuronavigation || Studyno: ||
newPartID:,robust

Performing EM optimization:

Performing gradient-based optimization:

```

Iteration 0: log pseudolikelihood = -972.37348
Iteration 1: log pseudolikelihood = -971.11579
Iteration 2: log pseudolikelihood = -971.10897
Iteration 3: log pseudolikelihood = -971.10895

```

Computing standard errors:

Mixed-effects regression Number of obs = 269

```

-----
|          No. of          Observations per Group
Group Variable |          Groups          Minimum          Average          Maximum
-----+-----
          Studyno |          12          10          22.4          40
          newPartID |          258          1          1.0          2
-----

```

8.58 Wald chi2(3) =

Log pseudolikelihood = -971.10895                      Prob > chi2                      =  
 0.0355

(Std. Err. adjusted for 12 clusters in

Studyno)

```
-----
-----
      BiRMT |           Coef.      Robust
      Interval] |           Std. Err.      z    P>|z|      [95% Conf.
-----+-----
      Age |      .1398177      .0658581      2.12   0.034      .0107382
.2688973
      Gender |
      Female |      2.668809      1.40876      1.89   0.058      -.0923103
5.429929
      Neuronavigation |
      No |      6.090487      2.782046      2.19   0.029      .6377772
11.5432
      _cons |      40.70272      3.260771      12.48   0.000      34.31172
47.09371
-----
-----
```

```
-----
-----
      Random-effects Parameters |           Estimate      Robust
      Interval] |           Std. Err.      [95% Conf.
-----+-----
      Studyno: Identity |
      var(_cons) |           21.995      8.800499      10.0403
48.18383
-----+-----
      newPartID: Identity |
      var(_cons) |           33.69647      4.428642      26.04432
43.5969
-----+-----
      var(Residual) |           40.35693      1.177169      38.11444
42.73137
-----
-----
```

\*Machine age gender Neuronav are p<0.10, so are all in the final model and no need for Step 2.

```
*Final model
mixed BiRMT c.Age i.Gender i.Neuronavigation i.Machine_BiRMT ||
Studyno: || newPartID:,robust
```

Performing EM optimization:

Performing gradient-based optimization:

```
Iteration 0: log pseudolikelihood = -969.32567
Iteration 1: log pseudolikelihood = -968.0294
Iteration 2: log pseudolikelihood = -968.02312
Iteration 3: log pseudolikelihood = -968.02311
```

Computing standard errors:

```
Mixed-effects regression          Number of obs    =
269
```

```
-----
Group Variable |      No. of      Observations per Group
                |      Groups      Minimum   Average   Maximum
-----+-----
          Studyno |           12          10      22.4      40
          newPartID |          258           1       1.0       2
-----
```

```
Wald chi2(5)          =
49.48
Log pseudolikelihood = -968.02311      Prob > chi2      =
0.0000
```

(Std. Err. adjusted for 12 clusters in Studyno)

```
-----
Robust
          BiRMT |      Coef.   Std. Err.      z    P>|z|    [95% Conf.
Interval]
-----+-----
          Age |   .1436453   .0645893     2.22   0.026   .0170525
          .2702381
          Gender
          Female |   2.619628   1.494448     1.75   0.080   -.3094365
          5.548692
          Neuronavigation
          No |   2.266546   2.162414     1.05   0.295   -1.971707
          6.5048
          Machine_BiRMT |
-----
```





Log pseudolikelihood = -964.26939                      Prob > chi2                      =  
 0.0000

(Std. Err. adjusted for 14 clusters in

Studyno)

```
-----
-----
      BiAMT |           Coef.      Robust
      Interval] |           Std. Err.      z    P>|z|      [95% Conf.
-----+-----
Machine_BiAMT |
MagstimRapid | 11.47653  2.860075  4.01  0.000  5.870888
17.08218
      Age | .0102896  .0291013  0.35  0.724  -.0467479
.067327
      Gender |
      Female | 1.212589  .8673283  1.40  0.162  -.4873428
2.912522
      _cons | 36.43792  2.406274  15.14  0.000  31.7217
41.15413
-----
-----
```

```
-----
-----
      Random-effects Parameters |           Estimate      Robust
      Interval] |           Std. Err.      [95% Conf.
-----+-----
Studyno: Identity |
      var(_cons) | 25.89262  9.841236  12.29284
54.53806
-----+-----
      var(Residual) | 55.19693  7.153314  42.81564
71.15861
-----
-----
```

. mixed BiAMT i.Neuronavigation c.Age i.Gender || Studyno:, robust

Performing EM optimization:

Performing gradient-based optimization:

Iteration 0: log pseudolikelihood = -967.26622  
 Iteration 1: log pseudolikelihood = -967.26622

Computing standard errors:

Mixed-effects regression  
 277  
 Group variable: Studyno  
 14

Number of obs =

Number of groups =

Obs per group:

min =

10

avg =

19.8

max =

38

Wald chi2(3) =

11.74

Prob > chi2 =

Log pseudolikelihood = -967.26622  
 0.0083

(Std. Err. adjusted for 14 clusters in

Studyno)

```
-----+-----
```

|                 | BiAMT  | Coef.    | Robust Std. Err. | z     | P> z  | [95% Conf. Interval] |
|-----------------|--------|----------|------------------|-------|-------|----------------------|
| -----+-----     |        |          |                  |       |       |                      |
| Neuronavigation | No     | 8.215334 | 3.889127         | 2.11  | 0.035 | .592785              |
| 15.83788        |        |          |                  |       |       |                      |
|                 | Age    | .0058006 | .0295783         | 0.20  | 0.845 | -.0521718            |
| .063773         |        |          |                  |       |       |                      |
|                 | Gender |          |                  |       |       |                      |
|                 | Female | 1.207429 | .8690058         | 1.39  | 0.165 | -.4957914            |
| 2.910649        |        |          |                  |       |       |                      |
|                 | _cons  | 36.88192 | 3.047584         | 12.10 | 0.000 | 30.90877             |
| 42.85508        |        |          |                  |       |       |                      |

```
-----+-----
```

```
-----+-----
```

| Random-effects Parameters | Estimate | Robust Std. Err. | [95% Conf. Interval] |
|---------------------------|----------|------------------|----------------------|
| -----+-----               |          |                  |                      |
| Studyno: Identity         |          |                  |                      |
| var(_cons)                | 41.76348 | 11.79172         | 24.01397             |
| 72.63222                  |          |                  |                      |

```
-----+-----
```

```

var(Residual) | 55.18199 7.155373 42.79797
71.14944
-----
-----

```

\*Step 2 regressions for Biphasic AMT.

\*This is the starting step 2 model for Biphasic AMT - all variables that obtained a p-value < 0.10 in stage 1 regressions.

```

. *iterating
. mixed BiAMT i.Machine_BiAMT i.Neuronavigation c.Age || Studyno:, robust

```

Performing EM optimization:

Performing gradient-based optimization:

```

Iteration 0: log pseudolikelihood = -964.48931
Iteration 1: log pseudolikelihood = -964.48931

```

Computing standard errors:

```

Mixed-effects regression                               Number of obs      =
277                                                    Number of groups   =
Group variable: Studyno                               Number of groups   =
14                                                    Obs per group:
                                                    min =
10                                                    avg =
19.8                                                  max =
38                                                    Wald chi2(3)       =
20.17                                                  Prob > chi2        =
Log pseudolikelihood = -964.48931                    0.0002

```

(Std. Err. adjusted for 14 clusters in Studyno)

```

-----
-----

```

|  | BiAMT | Coef. | Robust Std. Err. | z | P> z | [95% Conf. Interval] |
|--|-------|-------|------------------|---|------|----------------------|
|--|-------|-------|------------------|---|------|----------------------|

```

-----
-----

```

Machine\_BiAMT |

```

MagstimRapid | 9.884012 2.375768 4.16 0.000 5.227592
14.54043
Neuronavigation |
No | 3.56965 3.31251 1.08 0.281 -2.922751
10.06205
Age | .004566 .0277584 0.16 0.869 -.0498394
.0589714
_cons | 35.91625 3.373647 10.65 0.000 29.30402
42.52848

```

-----

-----

```

Random-effects Parameters | Estimate Robust Std. Err. [95% Conf.
Interval]
-----+-----

```

```

Studyno: Identity |
var(_cons) | 24.44731 9.193287 11.69879
51.08826
-----+-----

```

```

var(Residual) | 55.43709 7.315971 42.80242
71.80134
-----

```

-----

```

. mixed BiAMT i.Machine_BiAMT i.Neuronavigation i.Gender ||
Studyno:, robust

```

Performing EM optimization:

Performing gradient-based optimization:

```

Iteration 0: log pseudolikelihood = -963.7224
Iteration 1: log pseudolikelihood = -963.7224

```

Computing standard errors:

```

Mixed-effects regression          Number of obs      =
277
Group variable: Studyno           Number of groups   =
14
                                     Obs per group:
                                     min =
10
                                     avg =
19.8
                                     max =
38

```

30.30 Wald chi2(3) =  
 Log pseudolikelihood = -963.7224 Prob > chi2 =  
 0.0000

(Std. Err. adjusted for 14 clusters in

Studyno)

```
-----
```

|                 | BiAMT | Coef.    | Robust Std. Err. | z     | P> z  | [95% Conf. Interval] |
|-----------------|-------|----------|------------------|-------|-------|----------------------|
| Machine_BiAMT   |       |          |                  |       |       |                      |
| MagstimRapid    |       | 9.841807 | 2.475184         | 3.98  | 0.000 | 4.990535             |
| 14.69308        |       |          |                  |       |       |                      |
| Neuronavigation |       |          |                  |       |       |                      |
| No              |       | 3.597779 | 3.33627          | 1.08  | 0.281 | -2.941191            |
| 10.13675        |       |          |                  |       |       |                      |
| Gender          |       |          |                  |       |       |                      |
| Female          |       | 1.189822 | .8518392         | 1.40  | 0.162 | -.4797519            |
| 2.859396        |       |          |                  |       |       |                      |
| _cons           |       | 35.51965 | 3.12057          | 11.38 | 0.000 | 29.40344             |
| 41.63585        |       |          |                  |       |       |                      |

```
-----
```

```
-----
```

| Random-effects Parameters | Estimate | Robust Std. Err. | [95% Conf. Interval] |
|---------------------------|----------|------------------|----------------------|
| Studyno: Identity         |          |                  |                      |
| var(_cons)                | 24.31386 | 8.664651         | 12.09244             |
| 48.88705                  |          |                  |                      |
| var(Residual)             | 55.13081 | 7.159201         | 42.74238             |
| 71.1099                   |          |                  |                      |

```
-----
```

\*Final model
